# Supplementary material
Source: PubMed Central journal article supplement (PMC4848113)
Supplement: NIHMS762030-supplement-1.pdf [file NIHMS762030-supplement-1.pdf]

## Supplementary Materials for

**Analysis of five chronic inflammatory diseases identifies  
27 new associations and highlights disease-specific  
patterns at shared loci**

|                                                                                               |           |
|-----------------------------------------------------------------------------------------------|-----------|
| <b>Supplementary Tables .....</b>                                                             | <b>3</b>  |
| <b>Supplementary Figures .....</b>                                                            | <b>28</b> |
| <b>Supplementary Note .....</b>                                                               | <b>52</b> |
| eQTL analysis in peripheral blood.....                                                        | 52        |
| Gene prioritization, pathway analysis and tissue/cell type enrichment analysis .....          | 52        |
| Enrichment analysis using GoShifter.....                                                      | 53        |
| Annotation of association boundaries .....                                                    | 54        |
| Variance explained and heritability of single SNPs. ....                                      | 54        |
| ImmunoChip-wide co-heritability analysis .....                                                | 54        |
| Identification of drugs targeting genes within the core network .....                         | 55        |
| Conjunctional False Discovery Rate analysis.....                                              | 55        |
| Members of the International Inflammatory Bowel Disease Genetics Consortium (IIBDGC)<br>..... | 58        |
| Members of the International Genetics of Ankylosing Spondylitis Consortium (IGAS).....        | 61        |
| Members of International PSC Study Group (IPSCSG).....                                        | 63        |
| Genetic Analysis of Psoriasis Consortium (GAPC) .....                                         | 65        |
| Psoriasis Association Genetics Extension (PAGE) .....                                         | 66        |
| <b>References .....</b>                                                                       | <b>68</b> |

## Supplementary Tables

**Supplementary Table 1. Case/control panels used in the analysis before/after quality control.** ‘Consortium’ refers to the scientific group that provided DNA samples. All study subjects are of European ancestry.

| Phenotype                      | Consortium                                                                                                                                                                              | #Cases<br>preQC | #Controls<br>preQC | #Cases<br>QCed | #Controls<br>QCed | Platform          |
|--------------------------------|-----------------------------------------------------------------------------------------------------------------------------------------------------------------------------------------|-----------------|--------------------|----------------|-------------------|-------------------|
| Ankylosing spondylitis         | International Genetics of Ankylosing Spondylitis Consortium (IGAS)                                                                                                                      | 10,417          | 12,338             | 8,726          | -                 | ImmunoChip        |
| Crohn's disease                | International Inflammatory Bowel Disease Genetics Consortium (IIBDGC)                                                                                                                   | 19,761          | 28,999             | 19,085         | -                 | ImmunoChip        |
| Psoriasis                      | Collaborative Association Study of Psoriasis (CASP)<br>Genetic Analysis of Psoriasis Consortium<br>Psoriasis Association Genetics Extension<br>Wellcome Trust Case Control Consortium 2 | 6,577           | 15,085             | 6,530          | -                 | ImmunoChip        |
| Primary sclerosing cholangitis | The International PSC Study Group<br>The UK-PSC Consortium<br>International IBD Genetics Consortium                                                                                     | 3,789           | 25,079             | 3,408          | -                 | ImmunoChip        |
| Ulcerative colitis             | International Inflammatory Bowel Disease Genetics Consortium (IIBDGC)                                                                                                                   | 14,833          | -                  | 14,513         | -                 | ImmunoChip        |
| Unique controls                | Across all consortia                                                                                                                                                                    | -               | -                  | -              | 34,213            | ImmunoChip        |
| <b>Total</b>                   |                                                                                                                                                                                         | <b>55,377</b>   | <b>81,051</b>      | <b>52,262</b>  | <b>34,213</b>     | <b>ImmunoChip</b> |

**Supplementary Table 2. 27 newly identified single disease associations with genome-wide significance ( $P_{\text{SBM}} < 5 \times 10^{-7}$  and  $P_{\text{disease}} < 5 \times 10^{-8}$ ).** All variants were annotated used the variant effect predictor (VEP, release-77) from Ensembl (see **Methods**).

**SEE EXCEL file.**

**Pheno new gws locus:** phenotype with new genome-wide significant association signal ( $P_{\text{disease}} < 5 \times 10^{-8}$ ); **Chr:** chromosome; **BP\_B37:** base pair position from dbSNP build v142 (genome build hg19); **SNP:** rs ID; **IchipSNP:** original SNP chip ID; **A1:** minor allele in controls; **A2:** major allele in controls; **SNP\_pos\_l/SNP\_pos\_r:** left/right association boundaries for each index SNP (see **Methods** section). Genomic positions were retrieved from NCBI's dbSNP build v142 (genome build hg19); **P\_adj\_SBM:** adjusted (disease-combined) *P*-value ( $P_{\text{SBM}}$ ) from subset-based meta-analysis (SBM) (see **Methods**); **P/OR/CI95\_L/CI95\_R:** single disease *P*-value ( $P_{\text{disease}}$ ) and corresponding odds ratio and 95% confidence interval with respect to minor allele. **MAF:** disease-specific/control minor allele frequency.

**Consequence:** consequence type of this variation due to the VEP annotation tool; **Transcript\_id:** Ensembl RNA transcript ID; **Tssdistance:** distance to transcription start site; **sift\_prediction:** the SIFT prediction if available; **polyphen\_prediction:** the PolyPhen prediction if available; **gene\_symbol:** Ensembl stable ID of affected gene; **Immunobase codes 0:**no match **other than 0:**lead SNP (incl. SNPs in  $r^2 > 0.8$  with lead SNP) has a match in Immunobase for ankylosing spondylitis (AS), autoimmune thyroid disease (ATD), celiac disease (CEL), Crohn's disease (CRO) CRO, juvenile idiopathic arthritis (JIA), multiple sclerosis (MS), primary biliary cirrhosis (PBS), psoriasis (PSO), rheumatoid arthritis (RA), systemic lupus erythematosus (SLE), type 1 diabetes (T1D), ulcerative colitis (UC), other disease (OS). The numbers are internal scores assigned to tag each feature to a particular phenotype, see <http://www.immunobase.org/page/CriteriaDossierHome>.

**Supplementary Table 3. (a) Summary table of 169 non-MHC genome-wide significant susceptibility loci including 244 independent association signals with  $P_{\text{SBM}} < 5 \times 10^{-8}$  or ( $P_{\text{SBM}} < 5 \times 10^{-7}$  and  $P_{\text{disease}} < 5 \times 10^{-8}$ ) identified through the (conditional) subset-based meta-analysis of ankylosing spondylitis (AS), Crohn's disease (CD), psoriasis (PS), primary sclerosing cholangitis (PSC) and ulcerative colitis (UC). (b) Summary table of results from Bayesian multinomial regression to calculate the posterior probability ( $\text{Prob}_{\text{model}}$ ) for each possible disease model using a uniform prior across all models. (c) Summary table of results from Bayesian multinomial regression to calculate the mean posterior probability ( $\text{MeanProb}_{\text{model}}$ ) for each possible disease model using six different priors across all models.**

**SEE EXCEL file.**

**Locus:** number of locus defined by annotation of association boundaries (see **Methods**); **Num\_independent\_signal:** number of independent signal within a certain locus; **Chr:** chromosome; **Locus\_pos\_l/Locus\_pos\_r:** left/right association boundaries for locus (see **Methods** section). Genomic positions were retrieved from NCBI's dbSNP build v142 (genome build hg19); **Pheno\_SBM\_risk:** risk ( $\text{OR} > 1$ ) disease subset based from subset-based meta-analysis; **Pheno\_SBM\_protective:** protective ( $\text{OR} < 1$ ) disease subset from subset-based meta-analysis; **SNP:** rs ID; **IchipSNP:** original SNP chip ID; **Gene:** gene nearest to the index SNP as long as a gene was with 10kb of the SNP; **Strand:** strand information for A1/A2; **A1:** minor allele in controls; **A2:** major allele in controls; **BP\_B37:** base pair position from dbSNP build v142 (genome build hg19); **SNP\_pos\_l/SNP\_pos\_r:** left/right association boundaries for each index SNP (see **Methods** section). Genomic positions were retrieved from NCBI's dbSNP build v142 (genome build hg19); **P\_adj\_SBM:** adjusted (disease-combined)  $P$ -value ( $P_{\text{SBM}}$ ) from subset-based meta-analysis (SBM) (see **Methods**); **P/OR/CI95\_L/CI95\_R:** single disease  $P$ -value ( $P_{\text{disease}}$ ) and corresponding odds ratio and 95% confidence interval with respect to minor allele. **MAF:** disease-specific/control minor allele frequency. We tested for significantly different allele frequencies of variants across the batches from a particular disease or the control group (with at most one batch being removed) with a false discovery rate (FDR) threshold of 0.01 (**Supplementary Fig. 11**); **Known:** Best association signal from previous Immunochip/GWAS studies<sup>1-4</sup>. **Country allele freqs:** Allele frequencies by country information

**SNP:** rs ID; **BestModel:** disease model with highest probability ( $\text{Prob}_{\text{model}}$ ); **BestModelP:** Probability ( $\text{Prob}_{\text{model}}$ ) of disease model with highest probability; **BestModelPhenos:** Number of diseases involved in disease model with highest probability ( $\text{Prob}_{\text{model}}$ ); **ConfSetSize:** Number of disease models with  $\text{Prob}_{\text{model}} > 0.01$ ; **ConfSet:** Posterior probability ( $\text{Prob}_{\text{model}}$ ) for each of these disease models with  $\text{Prob} > 0.01$ , conditional on the genotype and phenotype data we have seen.

**VoteWinner:** Best disease model with highest posterior probability under six different priors; **VoteCount:** we counted how many priors voted for that model, and calculated the mean posterior from six different priors; **MeanP:** Mean posterior probability ( $\text{MeanProb}_{\text{model}}$ ) for the proposed model and risk variant of six different priors; **MinP:** Minimum posterior probability when using six different priors; **MaxP:** Maximum posterior probability when using six different priors;

**Supplementary Table 4. Summary table of different functional *in-silico* annotations for 244 risk SNPs from Supplementary table 3a.**

| <b>Functional Consequence</b> | <b>No.</b> |
|-------------------------------|------------|
| intron_variant                | 118        |
| upstream_gene_variant         | 42         |
| intergenic_variant            | 34         |
| downstream_gene_variant       | 19         |
| missense_variant              | 14         |
| regulatory_region_variant     | 5          |
| 3_prime_UTR_variant           | 4          |
| 5_prime_UTR_variant           | 1          |
| synonymous_variant            | 2          |
| splice_donor_variant          | 1          |
| splice_region_variant         | 1          |
| frameshift_variant            | 1          |
| <b>Total</b>                  | <b>244</b> |

**Supplementary Table 5. Functional *in-silico* annotations of Supplementary table 3a risk SNPs.**

**SEE EXCEL file.**

**Consequence:** consequence type of this variation due to the VEP annotation tool; **Transcript\_id:** Ensembl RNA transcript ID; **Tssdistance:** distance to transcription start site; **sift\_prediction:** the SIFT prediction if available; **polyphen\_prediction:** the PolyPhen prediction if available; **gene\_symbol:** Ensembl stable ID of affected gene; **Immunobase codes** **0:**no match **1:**lead SNP (incl. SNPs in  $r^2 > 0.8$  with lead SNP) has a match in Immunobase for ankylosing spondylitis (AS), autoimmune thyroid disease (ATD), celiac disease (CEL), Crohn's disease (CRO) CRO, juvenile idiopathic arthritis (JIA), multiple sclerosis (MS), primary biliary cirrhosis (PBS), psoriasis (PSO), rheumatoid arthritis (RA), systemic lupus erythematosus (SLE), type 1 diabetes (T1D), ulcerative colitis (UC), other disease (OS). The DNA Hypersensitivity sites (DHS) and Promoter annotations were taken from 1KGP annotations<sup>5</sup>.

**Supplementary Table 6. Analysis of *cis*-eQTL data from whole peripheral samples of 2,360 unrelated individuals<sup>6,7</sup>.**

**SEE EXCEL file.**

Shown are all significant (at FDR<5%) expression probes within 1Mb from our trait associated SNPs. For each trait SNP–probe pair we provide the following: 1) the best eQTL SNP; 2) LD between trait SNP and best eQTL SNP; 3) association statistics for trait SNP (P-value, z-score, FDR); 4) association statistics for best eQTL SNP (P-value, z-score, FDR); 5) trait SNP association statistics after conditioning on best eQTL SNP-effects (P-value, z-score, FDR); and 6) best eQTL SNP association statistics after conditioning on trait SNP-effects (P-value, z-score, FDR). Cis-effects in green mark the overlap of 5 gSNPs (from **Supplementary table 3a**) with the best eQTL SNP from this independent control cohort; cis-effects in yellow mark the overlap of another 5 gSNPs (from **Supplementary table 3a**) with the best secondary eQTL SNP from this independent control cohort; cis-effects marked in bold are conditionally independent from best eSNP.



**Supplementary Table 7. Cell/tissue types, enhancer types and number of facets that were tested in Fantom5 data<sup>8</sup>.** Cell/tissue id begins 'CL' these are cell types, those beginning 'UBERON' are tissues.

| <b>Cells or Tissues</b> | <b>Enhancer Type</b>     | <b>Number of facets tested</b> |
|-------------------------|--------------------------|--------------------------------|
| Cells (CL:xx)           | Differentially Expressed | 69                             |
|                         | Expressed                | 71                             |
| Tissues (UBERON:xx)     | Differentially Expressed | 41                             |
|                         | Expressed                | 41                             |

**Supplementary Table 8.** Number of annotation cell types, modification type and suggested function in Roadmap annotations<sup>9</sup>. We used the peak regions for the histone modifications H3K27ac, H3K4me3, H3K4me1, H3K9me3, and H3K9ac. These marks are enriched at active promoters and enhancers or transcriptionally silent or repressed regions.

| <b>Histone Modification</b> | <b>Number of cell types with annotation data</b> | <b>Modification Type</b> | <b>Function</b>                                  |
|-----------------------------|--------------------------------------------------|--------------------------|--------------------------------------------------|
| H3K27ac                     | 86                                               | Acetylation              | Transcriptional Activation                       |
| H3K4me3                     | 120                                              | Tri-methylation          | Actively transcribed promoters/TSS               |
| H3K4me1                     | 108                                              | Mono-methylation         | Actively transcribed enhancers                   |
| H3K9me3                     | 35                                               | Tri-methylation          | Transcriptionally silent heterochromatin regions |
| H3K9ac                      | 49                                               | Acetylation              | Actively Transcribed Promoters                   |

**Supplementary Table 9. Results from the association analysis (Supplementary table 3a) where separated into groups based on phenotype. Shared3+:** variants that were associated with 3 or more phenotypes; **IBD:** variants associated with IBD, UC or CD; **All variants:** all variants identified in the study regardless of phenotype. SNPs that were not present in the 1000 genomes dataset were removed from this analysis.

| <b>Group</b> | <b>No of variants for analysis</b> | <b>No. of variants excluded (not in 1KGP)</b> |
|--------------|------------------------------------|-----------------------------------------------|
| All variants | 234                                | 10                                            |
| Shared 3+    | 110                                | 4                                             |
| IBD          | 209                                | 9                                             |
| PS           | 66                                 | 0                                             |
| AS           | 106                                | 7                                             |
| CD           | 177                                | 8                                             |
| UC           | 159                                | 5                                             |
| PSC          | 60                                 | 1                                             |

**Supplementary Table 10. Enrichment analysis between SNPs in associated loci and various types of genomic annotations using GoShifter.** The table below shows the annotations that were enriched (with  $P < 10^{-3}$ ) for each tested group of SNPs. The analysis was performed using Goshifter and genomic annotations from Roadmap<sup>9</sup> and Fantom5<sup>8</sup>. GoShifter was run with 10,000 permutations; the  $P$  values labelled with a ‘\*’ were calculated from 1 million permutations. For the Roadmap annotations, the peak regions were used to define the annotation region. ‘Facet expressed’ annotations are robustly expressed enhancers that were significantly expressed in each contained sample within a facet. ‘Facet differentially expressed’ annotations are expressed enhancers that significantly deviate in expression between facets (Bonferroni corrected  $P < 0.05$ ). For information on grouping (Shared3+; IBD; All variants), see **Supplementary Table 9**.

| Phenotype    | Dataset | Tested Annotation              | Cell Type                    | Pvalue                 |
|--------------|---------|--------------------------------|------------------------------|------------------------|
| CD           | Fantom5 | Facet Differentially Expressed | T_cell                       | 0.0003                 |
| CD           | Fantom5 | Facet Expressed                | T_cell                       | 0.0003                 |
| All variants | Fantom5 | Facet Differentially Expressed | T_cell                       | 0.0001                 |
| All variants | Fantom5 | Facet Expressed                | T_cell                       | 0.0001                 |
| All variants | Fantom5 | Facet Differentially Expressed | T_cell                       | 0.0001                 |
| All variants | Fantom5 | Facet Expressed                | T_cell                       | $1.2 \times 10^{-5}$ * |
| All variants | Fantom5 | Facet Expressed                | Natural killer cells         | 0.0004                 |
| PS           | Roadmap | H3K27ac                        | Adipose Tissue               | 0.0001                 |
| IBD          | Roadmap | H3K4me3                        | CD3 Primary Cells            | 0.0009                 |
| All variants | Roadmap | H3K4me3                        | HUES64 Cell Line             | 0.0001                 |
| All variants | Roadmap | H3K4me3                        | Mobilized CD34 Primary Cells | 0.0004                 |
| All variants | Roadmap | H3K4me3                        | CD56 Primary Cells           | 0.0004                 |

**Supplementary Table 11. Temporal comorbidity was determined for the five inflammatory diseases under study in an independent data set covering ICD10 diagnose codes from 6,631,920 diagnoses in the entire Danish population in the period from 1996 to 2014<sup>10</sup>.**

| ICD-10 disease A | ICD-10 disease B | Name disease A                       | Name disease B                       | #Patients | P-value   | RR    | Significance (P<1.21×10 <sup>-9</sup> ) |
|------------------|------------------|--------------------------------------|--------------------------------------|-----------|-----------|-------|-----------------------------------------|
| M45              | K50              | Ankylosing spondylitis               | Crohn's disease [regional enteritis] | 155       | 3.39E-243 | 5.31  | significant                             |
| M45              | L40              | Ankylosing spondylitis               | Psoriasis                            | 60        | 1.98E-149 | 4.75  | significant                             |
| M45              | K83              | Ankylosing spondylitis               | Other diseases of biliary tract      | 13        | 0.0380    | 1.23  | non-significant                         |
| M45              | K51              | Ankylosing spondylitis               | Ulcerative colitis                   | 140       | 4.72E-178 | 3.74  | significant                             |
| K50              | M45              | Crohn's disease [regional enteritis] | Ankylosing spondylitis               | 178       | 0         | 5.84  | significant                             |
| K50              | L40              | Crohn's disease [regional enteritis] | Psoriasis                            | 126       | 4.19E-119 | 2.28  | significant                             |
| K50              | K83              | Crohn's disease [regional enteritis] | Other diseases of biliary tract      | 145       | 2.58E-186 | 2.81  | significant                             |
| K50              | K51              | Crohn's disease [regional enteritis] | Ulcerative colitis                   | 2404      | 0         | 11.22 | significant                             |
| L40              | M45              | Psoriasis                            | Ankylosing spondylitis               | 73        | 3.14E-130 | 4.37  | significant                             |
| L40              | K50              | Psoriasis                            | Crohn's disease [regional enteritis] | 81        | 4.85E-09  | 1.32  | non-significant                         |
| L40              | K83              | Psoriasis                            | Other diseases of biliary tract      | 31        | 1         | 0.60  | non-significant                         |
| L40              | K51              | Psoriasis                            | Ulcerative colitis                   | 141       | 3.76E-05  | 1.18  | non-significant                         |
| K83              | M45              | Other diseases of biliary tract      | Ankylosing spondylitis               | 9         | 1.68E-06  | 1.79  | non-significant                         |
| K83              | K50              | Other diseases of biliary tract      | Crohn's disease [regional enteritis] | 79        | 5.18E-144 | 3.21  | significant                             |
| K83              | L40              | Other diseases of biliary tract      | Psoriasis                            | 4         | 1         | 0.68  | non-significant                         |
| K83              | K51              | Other diseases of biliary tract      | Ulcerative colitis                   | 158       | 0         | 6.43  | significant                             |
| K51              | M45              | Ulcerative colitis                   | Ankylosing spondylitis               | 194       | 1.05E-187 | 3.54  | significant                             |
| K51              | K50              | Ulcerative colitis                   | Crohn's disease [regional enteritis] | 3928      | 0         | 13.99 | significant                             |
| K51              | L40              | Ulcerative colitis                   | Psoriasis                            | 127       | 1.73E-13  | 1.31  | significant                             |
| K51              | K83              | Ulcerative colitis                   | Other diseases of biliary tract      | 373       | 0         | 4.72  | significant                             |

**#Patients:** Number of pairs of diagnoses with disease A followed by disease B within a 5-year time frame of disease A; **RR:** relative risk, i.e. strength of the correlation between a pair of diagnoses. K83 (Other diseases of biliary tract) includes primary sclerosing cholangitis (PSC).

Supplementary Table 12. Clinical information on comorbidity for individual patients.

| Phenotype | Num. Cases | *Found in Annotations (%) | AS               |              |                 | IBD             |                 |                 | PS               |              |                 | PSC              |              |                 |
|-----------|------------|---------------------------|------------------|--------------|-----------------|-----------------|-----------------|-----------------|------------------|--------------|-----------------|------------------|--------------|-----------------|
|           |            |                           | 0                | 1            | 2               | 0               | 1               | 2               | 0                | 1            | 2               | 0                | 1            | 2               |
| AS        | 8,726      | 8,547                     | -                | -            | -               | 4,900<br>(57.3) | 403<br>(4.7)    | 3,244<br>(38.0) | 4,910<br>(57.5)  | 508<br>(5.9) | 3,129<br>(36.6) | 8,547<br>(100)   | 0 (0)        | 0 (0)           |
| IBD       | 34,598     | 32,586                    | 25,485<br>(78.2) | 330<br>(1.0) | 6,771<br>(20.8) | -               | -               | -               | 26,133<br>(80.2) | 208<br>(0.6) | 6,245<br>(19.2) | 25,828<br>(79.3) | 154<br>(0.5) | 6,604<br>(20.3) |
| PS        | 6,530      | 3,227                     | 1,964<br>(60.9)  | 314<br>(9.7) | 923<br>(28.6)   | 1,135<br>(35.2) | 23<br>(0.7)     | 2,043<br>(63.3) | -                | -            | -               | 2,322<br>(72.0)  | 0 (0)        | 879<br>(28.0)   |
| PSC       | 3,408      | 3,388                     | 1,038<br>(30.6)  | 19<br>(0.6)  | 2,314<br>(68.3) | 443<br>(13.1)   | 2,114<br>(62.4) | 814<br>(24.0)   | 807<br>(23.8)    | 41<br>(1.2)  | 2,523<br>(74.5) | -                | -            | -               |

\*: Number of samples (from **Supplementary Table 1**) we could ask the corresponding principal investigator for comorbidity information; 0=Unknown, 1=comorbidity present, 2=comorbidity absent; ankylosing spondylitis (AS), Inflammatory bowel disease (IBD), psoriasis (PS) and primary sclerosing cholangitis (PSC).

**Supplementary Table 13. BUHMBOX<sup>11</sup> power analysis.** For each power simulation 1,000 iterations were performed, each with different proportions of sample heterogeneity (PI). For certain pairs (see N/A values) it is impossible to reach 80% power regardless of PI, given the cohort (disease A)-specific case sample size and the set of specific disease B risk loci (MAF and OR) in **Supplementary Table 14**. Here, the power is maximal at PI~50%. For 10 and 18 out of 20 pairs of diseases, we have >50% power to detect 10% and 20% sample heterogeneity, respectively, suggesting that the GRS association is likely due to pleiotropy for those pairs. To calculate power, we used the real effect sizes and allele frequencies of known loci, and simulated the same number of cases and controls as our sample size. The nominal significance threshold of 0.05 was used.

| <b>Cohort</b> | <b>Risk loci</b> | <b>PI (at 50%)</b> | <b>PI (at 80%)</b> |
|---------------|------------------|--------------------|--------------------|
| AS            | CD               | 0.07               | 0.10               |
| AS            | PS               | 0.09               | 0.14               |
| AS            | PSC              | 0.20               | 0.39               |
| AS            | UC               | 0.07               | 0.11               |
| CD            | AS               | 0.12               | 0.21               |
| CD            | PS               | 0.07               | 0.10               |
| CD            | PSC              | 0.14               | 0.25               |
| CD            | UC               | 0.05               | 0.08               |
| PS            | AS               | 0.21               | 0.46               |
| PS            | CD               | 0.05               | 0.08               |
| PS            | PSC              | 0.25               | N/A                |
| PS            | UC               | 0.08               | 0.12               |
| PSC           | AS               | 0.34               | N/A                |
| PSC           | CD               | 0.11               | 0.17               |
| PSC           | PS               | 0.15               | 0.24               |
| PSC           | UC               | 0.12               | 0.18               |
| UC            | AS               | 0.15               | 0.24               |
| UC            | CD               | 0.05               | 0.08               |
| UC            | PS               | 0.07               | 0.11               |
| UC            | PSC              | 0.16               | 0.28               |

PI: proportion of sample heterogeneity; N/A: Not Available.

**Supplementary Table 14. Distinguishing pleiotropy and heterogeneity (BUHMBOX<sup>11</sup> analysis).**

| Cohort | Cohort size | Risk loci | #Risk loci | #Ichip risk loci | GRS <i>P</i> -value | BUHMBOX <i>P</i> -value |
|--------|-------------|-----------|------------|------------------|---------------------|-------------------------|
| AS     | 8232        | CD        | 139        | 117              | 3.36e-117           | 0.74                    |
| AS     | 8575        | PS        | 35         | 30               | 8.46e-44            | 0.19                    |
| AS     | 8710        | PSC       | 15         | 10               | 6.19e-21            | 0.76                    |
| AS     | 8277        | UC        | 133        | 113              | 1.63e-91            | 0.80                    |
| CD     | 18601       | AS        | 30         | 21               | 3.70e-80            | 0.71                    |
| CD     | 18855       | PS        | 35         | 30               | 1.66e-24            | 0.70                    |
| CD     | 19025       | PSC       | 15         | 10               | 2.55e-40            | 0.89                    |
| CD     | 18341       | UC        | 133        | 113              | 0                   | 0.87                    |
| PS     | 6509        | AS        | 30         | 21               | 1.27e-19            | 0.75                    |
| PS     | 6451        | CD        | 139        | 117              | 7.15e-25            | 0.61                    |
| PS     | 6511        | PSC       | 15         | 10               | 0.0230              | 0.13                    |
| PS     | 6465        | UC        | 133        | 113              | 2.56e-20            | 0.32                    |
| PSC    | 3377        | AS        | 30         | 21               | 1.05e-05            | 0.13                    |
| PSC    | 3275        | CD        | 139        | 117              | 7.01e-36            | 0.19                    |
| PSC    | 3309        | PS        | 35         | 30               | 0.420               | 0.67                    |
| PSC    | 3283        | UC        | 133        | 113              | 2.63e-50            | 0.14                    |
| UC     | 14173       | AS        | 30         | 21               | 3.71e-57            | 0.77                    |
| UC     | 14020       | CD        | 139        | 117              | 0                   | 0.94                    |
| UC     | 14316       | PS        | 35         | 30               | 0.00212             | 0.20                    |
| UC     | 14475       | PSC       | 15         | 10               | 3.42e-92            | 0.48                    |

**Cohort:** disease cohort; **Cohort size:** number of case samples in disease cohort (see **Methods** section); **#Risk loci:** Number of known disease B associated risk alleles from previous GWAS/ImmunoChip studies; **#Ichip Risk loci:** Number of known disease B associated risk alleles (from



previous GWAS/ImmunoChip studies) typed on ImmunoChip; **#GRS *P*-value:** Genetic risk score *P*-value; **#BUHMBOX *P*-value:** If significant, it indicates excessive positive correlations than expected.

**Supplementary Table 15. ImmunoChip-wide coheritability analysis.** Each disease cohort has a disjoint control cohort. Controls were randomly split into two groups (see also **Supplementary Figure 11**).

**a)** Estimates excluding MHC SNPs from genetic relationship matrix

| Trait 1 | Trait 2 | SNP-h2 trait 1 | s.e.     | SNP-h2 trait 2 | s.e.     | C(G)_tr12 | s.e.     |
|---------|---------|----------------|----------|----------------|----------|-----------|----------|
| AS      | CD      | 0.313324       | 0.010587 | 0.387648       | 0.008315 | 0.038459  | 0.002039 |
| AS      | PS      | 0.311414       | 0.010869 | 0.196479       | 0.010073 | 0.013831  | 0.001788 |
| AS      | PSC     | 0.324823       | 0.010849 | 0.200807       | 0.011054 | 0.014571  | 0.001656 |
| AS      | UC      | 0.3136         | 0.010636 | 0.305861       | 0.009123 | 0.033602  | 0.002042 |
| CD      | PS      | 0.384341       | 0.008458 | 0.203334       | 0.010214 | 0.015666  | 0.00178  |
| CD      | PSC     | 0.376686       | 0.00841  | 0.214204       | 0.011266 | 0.018139  | 0.001637 |
| CD      | UC      | 0.384685       | 0.007959 | 0.293923       | 0.008419 | 0.063766  | 0.001964 |
| PS      | PSC     | 0.194907       | 0.010174 | 0.203223       | 0.011355 | 0.005831  | 0.001376 |
| PS      | UC      | 0.196578       | 0.010159 | 0.303892       | 0.009308 | 0.008229  | 0.001766 |
| PSC     | UC      | 0.211393       | 0.01079  | 0.305266       | 0.009091 | 0.030452  | 0.001629 |

| Trait 1 | Trait 2 | rG       | s.e.     | LIAB_h2 trait 1 | s.e.        | LIAB_h2 trait 2 | s.e.        | LIAB_COH    | s.e.        | CHI_SQR_STAT | PVAL      |
|---------|---------|----------|----------|-----------------|-------------|-----------------|-------------|-------------|-------------|--------------|-----------|
| AS      | CD      | 0.48524  | 0.022997 | 0.168731887     | 0.005701333 | 0.129351077     | 0.002774564 | 0.071686966 | 0.006659028 | 445.2160556  | 7.93E-99  |
| AS      | PS      | 0.280237 | 0.03505  | 0.167755904     | 0.005855032 | 0.139789697     | 0.007166677 | 0.042914293 | 0.010520117 | 63.92561364  | 1.29E-15  |
| AS      | PSC     | 0.32766  | 0.035322 | 0.174996268     | 0.005844828 | 0.081681343     | 0.004496385 | 0.039174121 | 0.008277081 | 86.05107129  | 1.75E-20  |
| AS      | UC      | 0.471562 | 0.025609 | 0.169072803     | 0.005734242 | 0.108325291     | 0.003231048 | 0.063817621 | 0.006792826 | 339.0723386  | 1.02E-75  |
| CD      | PS      | 0.265922 | 0.029312 | 0.128263691     | 0.002822635 | 0.144601538     | 0.007263714 | 0.036215342 | 0.007824198 | 82.30337278  | 1.17E-19  |
| CD      | PSC     | 0.348066 | 0.029639 | 0.125712327     | 0.00280669  | 0.087116877     | 0.004581888 | 0.036425178 | 0.006079386 | 137.910112   | 7.63E-32  |
| CD      | UC      | 0.780559 | 0.015294 | 0.12837389      | 0.002656012 | 0.104104079     | 0.002981911 | 0.09023561  | 0.003465368 | 2604.769509  | 0         |
| PS      | PSC     | 0.181576 | 0.042088 | 0.13867126      | 0.007238536 | 0.082547511     | 0.004612308 | 0.019426907 | 0.008825912 | 18.61231147  | 1.60E-05  |
| PS      | UC      | 0.157911 | 0.033565 | 0.13971538      | 0.007220383 | 0.107648616     | 0.003297202 | 0.019365946 | 0.008068059 | 22.1335698   | 2.54E-06  |
| PSC     | UC      | 0.642348 | 0.027303 | 0.085997858     | 0.004389535 | 0.108116585     | 0.003219775 | 0.061938453 | 0.00516008  | 553.5030449  | 2.18E-122 |

**SNP-h2:** SNP-based trait heritability (genetic variation) on the observed scale (estimate and standard error). **C(G)\_tr12:** (SNP-based coheritability (genetic covariance) between traits 1 and 2 (estimate and standard error). **rG:** Genetic correlation coefficient; **LIAB\_h2:** Proportion of genetic variance in liability (SNP-based heritability; estimate and standard error). **LIAB\_COH:** Proportion of genetic covariance in liability between diseases (SNP-based coheritability; estimate and standard error); **CHI\_SQR\_STAT:** Approximated  $\chi^2$  test statistic (estimate/s.e.)<sup>12</sup> was used to test whether estimates were significantly different from zero.

b) Estimates including MHC SNPs from genetic relationship matrix

| Trait 1 | Trait 2 | SNP-h2 trait 1 | s.e.     | SNP-h2 trait 2 | s.e.     | C(G)_tr12 | s.e.     |
|---------|---------|----------------|----------|----------------|----------|-----------|----------|
| AS      | CD      | 0.607864       | 0.008127 | 0.395896       | 0.008436 | 0.018641  | 0.002003 |
| AS      | PS      | 0.604359       | 0.00816  | 0.269043       | 0.010387 | 0.008369  | 0.001826 |
| AS      | PSC     | 0.606925       | 0.008143 | 0.243822       | 0.011304 | 0.00625   | 0.001664 |
| AS      | UC      | 0.606463       | 0.008144 | 0.330379       | 0.009255 | 0.017436  | 0.002034 |
| CD      | PS      | 0.39212        | 0.008479 | 0.27769        | 0.010443 | 0.01566   | 0.001836 |
| CD      | PSC     | 0.386301       | 0.008431 | 0.255168       | 0.011338 | 0.016333  | 0.001652 |
| CD      | UC      | 0.393416       | 0.007996 | 0.326327       | 0.008557 | 0.064567  | 0.00202  |
| PS      | PSC     | 0.178871       | 0.001948 | 0.135062       | 0.001553 | 0.00408   | 0.001428 |
| PS      | UC      | 0.273021       | 0.010409 | 0.332998       | 0.009274 | 0.006149  | 0.001839 |
| PSC     | UC      | 0.259351       | 0.010962 | 0.329989       | 0.009092 | 0.030851  | 0.001661 |

| Trait 1 | Trait 2 | rG       | s.e.     | LIAB_T1_h2  | LIAB_T1_h2_se | LIAB_T2_h2  | LIAB_T2_h2_se | LIAB_COH    | LIAB_COH_SE | CHI_SQR_STAT | PVAL        |
|---------|---------|----------|----------|-------------|---------------|-------------|---------------|-------------|-------------|--------------|-------------|
| AS      | CD      | 0.184047 | 0.019432 | 0.327348176 | 0.004376569   | 0.132103284 | 0.00281494    | 0.038272824 | 0.007920185 | 89.7062045   | 2.76E-21    |
| AS      | PS      | 0.116772 | 0.025335 | 0.325562726 | 0.004395718   | 0.191417096 | 0.00739008    | 0.029150527 | 0.012396089 | 21.24396709  | 4.04E-06    |
| AS      | PSC     | 0.104906 | 0.027794 | 0.326976876 | 0.004386988   | 0.099178358 | 0.004598076   | 0.018891537 | 0.009810115 | 14.24618401  | 0.000160386 |
| AS      | UC      | 0.186522 | 0.021448 | 0.326965558 | 0.004390717   | 0.117008711 | 0.003277798   | 0.036482968 | 0.008222483 | 75.62868083  | 3.42E-18    |
| CD      | PS      | 0.228812 | 0.026154 | 0.130859728 | 0.002829643   | 0.197480014 | 0.007426568   | 0.036782681 | 0.008240599 | 76.53874831  | 2.16E-18    |
| CD      | PSC     | 0.289314 | 0.027931 | 0.128921165 | 0.002813698   | 0.103776957 | 0.00461117    | 0.033464322 | 0.006332207 | 107.2916514  | 3.84E-25    |
| CD      | UC      | 0.740193 | 0.015473 | 0.131287527 | 0.002668359   | 0.115581196 | 0.003030789   | 0.091180149 | 0.00373582  | 2288.447198  | 0           |
| PS      | PSC     | 0.100619 | 0.034934 | 0.127262063 | 0.001385951   | 0.054861074 | 0.000630816   | 0.008407398 | 0.005721185 | 8.295897199  | 0.003973474 |
| PS      | UC      | 0.097363 | 0.028984 | 0.194046296 | 0.007398068   | 0.117958926 | 0.003285158   | 0.014730315 | 0.008594735 | 11.2842124   | 0.00078169  |
| PSC     | UC      | 0.576805 | 0.025402 | 0.105507895 | 0.004459507   | 0.116872772 | 0.003220129   | 0.064051332 | 0.005528701 | 515.611042   | 3.81E-114   |

**SNP-h2:** SNP-based trait heritability (genetic variation) on the observed scale (estimate and standard error). **C(G)\_tr12:** (SNP-based coheritability (genetic covariance) between traits 1 and 2 (estimate and standard error). **rG:** Genetic correlation coefficient; **LIAB\_h2:** Proportion of genetic variance in liability (SNP-based heritability; estimate and standard error). **LIAB\_COH:** Proportion of genetic covariance in liability between diseases (SNP-based coheritability; estimate and standard error); **CHI\_SQR\_STAT:** Approximated  $\chi^2$  test statistic (estimate/s.e.)<sup>12</sup> was used to test whether estimates were significantly different from zero.

**Supplementary Table 16. Tracy-Widom statistics<sup>13</sup> were computed to evaluate the statistical significance of each principal component identified by PCA. The top seven axes of variation are significant ( $P < 0.05$ ).**

| <b>Eigenvector</b> | <b>Eigenvalue</b> | <b>TW p-value</b> |
|--------------------|-------------------|-------------------|
| 1                  | 71.023013         | 0                 |
| 2                  | 34.287195         | 0                 |
| 3                  | 16.598979         | 0                 |
| 4                  | 12.681529         | 0                 |
| 5                  | 12.040553         | 0                 |
| 6                  | 9.319227          | 4.89e-153         |
| 7                  | 8.952494          | 3.75e-56          |
| 8                  | 8.135447          | 1                 |
| 9                  | 8.083592          | 1                 |
| 10                 | 7.858132          | 1                 |
| ...                | ...               | ...               |

**Supplementary Table 17. Results from Conjunctive False Discovery Rate analysis.**

The 111 pleiotropic loci for Crohn's diseases(CD) and ulcerative colitis (UC) identified by the conjunction FDR method, with conjFDR  $\leq$  0.05.

| Loci    | LeadingSNP   | Chr | Pos       | Genes                                 | Min             | P_CD     | Z_CD      | P_UC     | Z_UC      |
|---------|--------------|-----|-----------|---------------------------------------|-----------------|----------|-----------|----------|-----------|
| conjFDR |              |     |           |                                       |                 |          |           |          |           |
| 1       | rs11804831   | 1   | 1194804   | <i>UBE2J2</i>                         | 1.47E-02        | 7.66E-03 | 2.65E+00  | 1.28E-03 | 3.19E+00  |
| 2       | *rs3766606   | 1   | 8022197   | <i>PARK7</i>                          | 4.07E-03        | 1.83E-03 | -3.08E+00 | 4.70E-05 | -4.04E+00 |
| 3       | rs7523119    | 1   | 33766706  | <i>AL513327.1/ZNF362</i>              | 1.69E-02        | 9.55E-04 | 3.28E+00  | 1.05E-02 | 2.53E+00  |
| 4       | *rs10889669  | 1   | 67675728  | <i>IL23R/C1orf141</i>                 | 6.08E-09        | 3.20E-37 | 1.27E+01  | 4.64E-03 | 2.81E+00  |
| 5       | rs12734559   | 1   | 101563001 | <i>DPH5/S1PR1</i>                     | 2.19E-02        | 8.80E-03 | 2.57E+00  | 3.93E-11 | 6.59E+00  |
| 6       | *rs4845604   | 1   | 151801680 | <i>RORC</i>                           | <b>3.36E-02</b> | 1.87E-02 | -2.31E+00 | 9.59E-03 | 2.56E+00  |
| 7       | rs11264305   | 1   | 155033572 | <i>ADAM15/EFNA4/EFNA3</i>             | <b>4.20E-02</b> | 1.16E-04 | -3.83E+00 | 1.26E-21 | -9.53E+00 |
| 8       | *rs201651973 | 1   | 161472789 | <i>FCGR2A</i>                         | 6.07E-04        | 2.32E-04 | 3.67E+00  | 1.04E-05 | -4.37E+00 |
| 9       | rs12740041   | 1   | 197814607 | <i>C1orf53/DENND1B</i>                | 2.30E-03        | 7.97E-04 | 3.33E+00  | 4.92E-03 | 2.79E+00  |
| 10      | *rs55838263  | 1   | 200874728 | <i>C1orf106</i>                       | 8.20E-09        | 1.13E-09 | -6.08E+00 | 1.47E-02 | -2.39E+00 |
| 11      | rs823096     | 1   | 205679887 | <i>AC119673.1/NUCKS1</i>              | <b>3.55E-02</b> | 6.32E-03 | 2.70E+00  | 1.13E-02 | 2.45E+00  |
| 12      | *rs3024493   | 1   | 206943968 | <i>IL10</i>                           | 4.30E-07        | 9.37E-08 | 5.31E+00  | 1.66E-04 | -3.74E+00 |
| 13      | rs6752378    | 2   | 25150116  | <i>ADCY3/DNAJC27/DNMT3A</i>           | 5.66E-03        | 5.25E-07 | 4.98E+00  | 5.62E-14 | 7.50E+00  |
| 14      | *rs925255    | 2   | 28614794  | <i>FOSL2/AC104695.3/RP11-373D23.2</i> | <b>4.20E-02</b> | 3.63E-08 | -5.49E+00 | 4.35E-04 | 3.49E+00  |
| 15      | *rs72788875  | 2   | 43456430  | <i>THADA/AC010883.5/ZFP36L2</i>       | 1.17E-02        | 7.83E-04 | 3.34E+00  | 8.43E-04 | -3.30E+00 |
| 16      | *rs55776317  | 2   | 61191995  | <i>PUS10</i>                          | 3.48E-07        | 7.57E-08 | 5.36E+00  | 5.39E-11 | -6.54E+00 |
| 17      | *rs4671663   | 2   | 65661534  | <i>AC074391.1/SPRED2</i>              | 1.69E-02        | 9.34E-04 | 3.29E+00  | 7.93E-03 | 2.61E+00  |
| 18      | *rs11123902  | 2   | 102610642 | <i>IL1R2</i>                          | 4.07E-03        | 2.19E-03 | -2.40E+00 | 9.53E-03 | 2.55E+00  |
| 19      | rs728700     | 2   | 164577569 | <i>FIGN</i>                           | <b>4.36E-02</b> | 2.69E-02 | -2.18E+00 | 4.46E-14 | 7.52E+00  |
| 20      | rs74961493   | 2   | 185670496 | <i>ZNF804A</i>                        | <b>2.92E-02</b> | 1.11E-03 | 3.24E+00  | 4.26E-08 | -5.45E+00 |
| 21      | rs113646228  | 2   | 199564311 | <i>AC019330.1</i>                     | 2.19E-02        | 7.47E-03 | 2.64E+00  | 6.07E-03 | 2.70E+00  |
| 22      | rs13023604   | 2   | 207413402 | <i>ADAM23</i>                         | 1.33E-02        | 3.24E-03 | 2.90E+00  | 6.61E-03 | -2.67E+00 |
| 23      | *rs3749171   | 2   | 241569692 | <i>GPR35</i>                          | 1.14E-03        | 5.58E-04 | 3.43E+00  | 1.15E-03 | 3.21E+00  |
| 24      | rs265318     | 3   | 10180659  | <i>VHL/snoU13</i>                     | 1.11E-02        | 3.03E-03 | 2.93E+00  | 1.27E-03 | 3.18E+00  |
| 25      | rs182867     | 3   | 18613387  | <i>AC144521.1</i>                     | 1.41E-02        | 5.49E-07 | 4.98E+00  | 3.88E-03 | 2.84E+00  |

|    |              |   |           |                                    |                 |          |           |          |           |
|----|--------------|---|-----------|------------------------------------|-----------------|----------|-----------|----------|-----------|
| 26 | rs7646643    | 3 | 33046637  | <i>GLB1</i>                        | <b>4.99E-02</b> | 1.76E-02 | 2.35E+00  | 1.56E-02 | -2.36E+00 |
| 27 | rs9869542    | 3 | 45934588  | <i>LZTFL1/CCR9</i>                 | <b>3.26E-02</b> | 1.74E-02 | 2.34E+00  | 3.07E-03 | 2.94E+00  |
| 28 | *rs3197999   | 3 | 49721532  | <i>APEH/MST1/AC099668.5</i>        | 4.33E-08        | 7.45E-09 | 5.77E+00  | 4.70E-03 | 2.76E+00  |
| 29 | rs11729849   | 4 | 16583148  | <i>LDB2</i>                        | <b>4.94E-02</b> | 2.26E-02 | 2.26E+00  | 1.18E-02 | -2.47E+00 |
| 30 | rs2457996    | 4 | 74856535  | <i>PPBP/CXCL5</i>                  | 1.44E-02        | 7.16E-03 | -2.66E+00 | 1.40E-03 | 3.17E+00  |
| 31 | *rs7690997   | 4 | 102715549 | <i>BANK1</i>                       | 1.17E-02        | 4.47E-05 | 4.05E+00  | 8.44E-09 | 5.74E+00  |
| 32 | rs35914000   | 4 | 123355923 | <i>ADAD1</i>                       | 1.33E-03        | 1.34E-06 | 4.82E+00  | 1.39E-02 | 2.41E+00  |
| 33 | *rs395157    | 5 | 38867732  | <i>OSMR</i>                        | 6.79E-03        | 2.39E-04 | -3.64E+00 | 1.29E-03 | 3.14E+00  |
| 34 | rs7734434    | 5 | 40436698  | <i>DAB2/PTGER4</i>                 | 3.79E-05        | 7.35E-27 | 1.07E+01  | 5.60E-03 | 2.74E+00  |
| 35 | rs7445013    | 5 | 71697977  | <i>PTCD2/ZNF366</i>                | <b>3.61E-02</b> | 1.83E-02 | -2.33E+00 | 2.52E-05 | -4.19E+00 |
| 36 | rs304151     | 5 | 88125853  | <i>MEF2C</i>                       | 1.47E-02        | 7.81E-03 | -2.63E+00 | 4.01E-03 | 2.84E+00  |
| 37 | rs12517950   | 5 | 131731326 | <i>SLC22A5</i>                     | 2.75E-03        | 2.88E-17 | 8.44E+00  | 7.64E-03 | -2.62E+00 |
| 38 | *rs6863411   | 5 | 141513204 | <i>NDFIP1</i>                      | <b>2.92E-02</b> | 6.66E-05 | -3.97E+00 | 1.86E-03 | -3.08E+00 |
| 39 | *rs12656538  | 5 | 150251380 | <i>IRGM</i>                        | 6.23E-04        | 3.48E-16 | 8.15E+00  | 1.06E-02 | 2.52E+00  |
| 40 | rs56167332   | 5 | 158827769 | <i>EBF1/IL12B/LOC285627/RNF145</i> | 7.94E-07        | 1.12E-16 | 8.28E+00  | 1.62E-02 | -2.37E+00 |
| 41 | rs17119      | 6 | 14719496  | <i>CD83/JARID2</i>                 | <b>3.50E-02</b> | 3.62E-06 | -4.60E+00 | 4.86E-03 | 2.77E+00  |
| 42 | *rs4712520   | 6 | 20640871  | <i>CDKAL1</i>                      | 2.03E-02        | 5.88E-04 | -3.39E+00 | 5.74E-05 | -3.98E+00 |
| 43 | rs7752195    | 6 | 25419094  | <i>LRRC16A</i>                     | 2.50E-02        | 1.32E-02 | -2.44E+00 | 1.83E-06 | 4.74E+00  |
| 44 | rs12214723   | 6 | 41993688  | <i>RP11-533020.2/CCND3</i>         | <b>4.89E-02</b> | 5.44E-03 | 2.72E+00  | 2.65E-03 | 2.97E+00  |
| 45 | rs7767178    | 6 | 106439072 | <i>PRDM1/PREP</i>                  | 1.69E-02        | 2.34E-08 | 5.57E+00  | 4.37E-03 | 2.78E+00  |
| 46 | rs77086638   | 6 | 138000793 | <i>OLIG3/TNFAIP3</i>               | 1.55E-02        | 2.71E-03 | -2.96E+00 | 1.28E-02 | 2.46E+00  |
| 47 | *rs111305875 | 6 | 167511586 | <i>RP11-517H2.6</i>                | 1.41E-02        | 1.76E-05 | -4.27E+00 | 6.73E-06 | 4.48E+00  |
| 48 | *rs12700762  | 7 | 26793597  | <i>SKAP2</i>                       | 1.69E-02        | 5.67E-05 | 3.99E+00  | 6.24E-04 | -3.40E+00 |
| 49 | rs4917131    | 7 | 50324652  | <i>C7orf72/IKZF1</i>               | 3.94E-03        | 5.30E-04 | -3.44E+00 | 4.06E-12 | 6.92E+00  |
| 50 | rs2395022    | 7 | 98750379  | <i>KPNA7/SMURF1</i>                | 1.10E-03        | 2.47E-04 | 3.63E+00  | 5.65E-03 | 2.73E+00  |
| 51 | rs4730274    | 7 | 107479719 | <i>DLD/SLC26A3</i>                 | 1.44E-02        | 7.63E-03 | -2.61E+00 | 1.11E-03 | -3.22E+00 |
| 52 | rs73238193   | 7 | 128562446 | <i>IRF5/KCP</i>                    | 1.48E-02        | 5.63E-03 | -2.73E+00 | 3.08E-03 | 2.90E+00  |
| 53 | rs2538470    | 7 | 148220448 | <i>C7orf33/CNTNAP2</i>             | 9.78E-03        | 9.46E-04 | 3.26E+00  | 7.07E-04 | -3.35E+00 |
| 54 | rs12679874   | 8 | 27230819  | <i>PTK2B</i>                       | 1.88E-02        | 1.08E-02 | -2.53E+00 | 2.13E-04 | 3.68E+00  |
| 55 | rs200219048  | 8 | 79240357  | <i>NoGene</i>                      | <b>4.75E-02</b> | 4.27E-03 | 2.84E+00  | 1.53E-03 | 5.46E-01  |
| 56 | rs60298754   | 8 | 89373041  | <i>RP11-586K2.1</i>                | <b>2.72E-02</b> | 1.57E-02 | 2.39E+00  | 1.02E-03 | -3.25E+00 |
| 57 | rs661356     | 9 | 244457    | <i>DOCK8</i>                       | <b>2.53E-02</b> | 1.71E-03 | 3.11E+00  | 3.51E-06 | 4.60E+00  |



|    |             |    |           |                                        |                 |          |           |          |           |
|----|-------------|----|-----------|----------------------------------------|-----------------|----------|-----------|----------|-----------|
| 58 | *rs62541532 | 9  | 5017384   | JAK2                                   | 6.08E-09        | 3.09E-10 | 6.28E+00  | 1.27E-03 | -3.19E+00 |
| 59 | *rs11574914 | 9  | 34710338  | CCL21                                  | <b>2.79E-02</b> | 3.77E-03 | 2.88E+00  | 1.37E-02 | 2.41E+00  |
| 60 | rs7868736   | 9  | 116528183 | RGS3/ZNF618                            | <b>2.71E-02</b> | 3.28E-03 | 2.92E+00  | 4.74E-04 | 3.46E+00  |
| 61 | *rs4366152  | 9  | 117564875 | TNFSF15                                | 3.79E-05        | 5.99E-07 | -4.96E+00 | 1.09E-02 | -2.51E+00 |
| 62 | *rs10781499 | 9  | 139266405 | CARD9/SNAPC<br>4                       | 2.97E-07        | 1.99E-15 | 7.93E+00  | 1.68E-02 | 2.32E+00  |
| 63 | rs116874444 | 10 | 30711536  | LOC729668/MA<br>P3K8                   | <b>3.87E-02</b> | 2.98E-03 | -2.94E+00 | 1.39E-02 | 2.42E+00  |
| 64 | rs66887762  | 10 | 35330577  | CUL2                                   | 1.33E-03        | 2.57E-12 | 6.98E+00  | 8.74E-05 | 3.90E+00  |
| 65 | rs7072206   | 10 | 59925048  | IPMK/MIR3924                           | <b>4.53E-02</b> | 2.57E-03 | -2.98E+00 | 1.60E-03 | 3.13E+00  |
| 66 | rs10761659  | 10 | 64445564  | ADO/ZNF365                             | 7.33E-06        | 1.78E-15 | -7.94E+00 | 7.57E-04 | -3.34E+00 |
| 67 | rs2688607   | 10 | 75663736  | C10orf55/CAMK<br>2G                    | <b>4.20E-02</b> | 2.47E-04 | -3.64E+00 | 5.76E-03 | -2.72E+00 |
| 68 | *rs1892497  | 10 | 81043707  | ZMIZ1                                  | 2.43E-02        | 1.75E-10 | -6.37E+00 | 1.14E-02 | -2.49E+00 |
| 69 | *rs2497318  | 10 | 94432000  | EIF2S2P3                               | 1.33E-03        | 3.48E-04 | -3.53E+00 | 6.57E-03 | -2.65E+00 |
| 70 | *rs6584281  | 10 | 101286480 | RP11-<br>129J12.1/RP11-<br>129J12.2    | 6.08E-09        | 6.63E-13 | -7.17E+00 | 3.93E-03 | -2.83E+00 |
| 71 | rs907611    | 11 | 1874072   | LSP1                                   | 2.37E-02        | 1.39E-02 | 2.42E+00  | 1.54E-02 | 2.35E+00  |
| 72 | rs10750899  | 11 | 58284951  | LPXN/OR5B21                            | <b>4.15E-02</b> | 2.56E-02 | 2.19E+00  | 1.44E-02 | 2.41E+00  |
| 73 | *rs11230563 | 11 | 60776209  | CD6                                    | 1.69E-02        | 2.86E-05 | -4.16E+00 | 3.68E-03 | -2.85E+00 |
| 74 | rs559928    | 11 | 64150370  | PRDX5/RPS6K<br>A4/SLC22A11/T<br>RMT112 | 3.94E-03        | 2.23E-04 | -3.66E+00 | 3.98E-03 | -2.83E+00 |
| 75 | rs559298    | 11 | 65998757  | PACS1                                  | <b>4.43E-02</b> | 1.94E-02 | 2.30E+00  | 7.36E-03 | -2.61E+00 |
| 76 | rs7126418   | 11 | 76292573  | C11orf30/LRRC<br>32                    | 1.58E-04        | 1.76E-17 | 8.49E+00  | 1.47E-02 | 2.41E+00  |
| 77 | *rs56086356 | 11 | 128376476 | ETS1                                   | 1.70E-02        | 5.19E-03 | 2.77E+00  | 4.27E-03 | -2.81E+00 |
| 78 | rs7960062   | 12 | 40822012  | RP11-<br>115F18.1/MUC1<br>9            | <b>4.20E-02</b> | 1.72E-04 | 3.72E+00  | 5.03E-03 | 2.75E+00  |
| 79 | rs117084250 | 12 | 57921866  | DCTN2/MBD6                             | 2.22E-02        | 2.76E-03 | -2.98E+00 | 1.45E-04 | 3.75E+00  |
| 80 | *rs7969592  | 12 | 68579649  | IFNG-AS1                               | 4.07E-03        | 2.02E-03 | -3.05E+00 | 8.68E-08 | -5.30E+00 |
| 81 | rs12425244  | 12 | 129880928 | TMEM132D                               | 1.37E-02        | 3.87E-03 | -2.87E+00 | 3.22E-03 | -2.91E+00 |
| 82 | rs17084983  | 13 | 27528301  | GPR12/USP12                            | 1.41E-03        | 6.22E-04 | 3.40E+00  | 2.52E-03 | 2.96E+00  |
| 83 | rs9603611   | 13 | 40330105  | COG6                                   | 1.41E-02        | 9.36E-04 | -3.29E+00 | 1.83E-03 | -3.08E+00 |
| 84 | rs12865253  | 13 | 58373697  | DIAPH3/PCDH1<br>7                      | 7.78E-03        | 3.27E-03 | 2.90E+00  | 1.47E-02 | 2.41E+00  |
| 85 | *rs11624293 | 14 | 88488821  | LINC01146/RP1<br>1-300J18.1            | 5.66E-03        | 1.62E-05 | 4.29E+00  | 2.48E-04 | 3.64E+00  |
| 86 | rs4984246   | 15 | 63758428  | AC007950.1                             | 2.03E-02        | 6.67E-04 | -3.36E+00 | 8.89E-03 | 2.57E+00  |
| 87 | *rs367569   | 16 | 11365500  | TNP2/RM12/PR<br>M3/PRM2/SNO            | 5.66E-03        | 1.65E-06 | -4.76E+00 | 7.90E-03 | 2.63E+00  |

| RA48 |             |    |          |                                               |                 |          |           |          |           |
|------|-------------|----|----------|-----------------------------------------------|-----------------|----------|-----------|----------|-----------|
| 88   | *rs7404095  | 16 | 23864590 | <i>PRKCB</i>                                  | 5.66E-03        | 3.95E-04 | -3.51E+00 | 5.56E-11 | 6.54E+00  |
| 89   | rs62036620  | 16 | 28833097 | <i>ATXN2L/RP11-1348G14.5/RP11-1348G14.4</i>   | 5.66E-03        | 5.52E-08 | 5.41E+00  | 8.01E-03 | 2.62E+00  |
| 90   | rs1872691   | 16 | 50350210 | <i>BRD7/ADCY7</i>                             | 3.29E-03        | 3.87E-05 | -4.09E+00 | 8.87E-03 | 2.57E+00  |
| 91   | *rs11649485 | 16 | 86014455 | <i>RP11-542M13.2</i>                          | <b>4.20E-02</b> | 2.96E-08 | -5.53E+00 | 2.91E-08 | -5.52E+00 |
| 92   | rs11870164  | 17 | 32567679 | <i>ACCN1/CCL11/CCL2/CCL8</i>                  | 4.72E-03        | 1.36E-07 | -5.26E+00 | 1.38E-08 | 5.66E+00  |
| 93   | *rs9907088  | 17 | 38035116 | <i>ZBPB2</i>                                  | 2.65E-06        | 1.13E-08 | 5.69E+00  | 8.25E-03 | -2.58E+00 |
| 94   | *rs3816769  | 17 | 40498273 | <i>STAT3</i>                                  | 9.10E-04        | 4.39E-08 | -5.45E+00 | 1.71E-04 | 3.73E+00  |
| 95   | *rs35153695 | 18 | 12808467 | <i>PTPN2</i>                                  | 1.35E-05        | 7.44E-11 | 6.50E+00  | 1.24E-03 | -3.16E+00 |
| 96   | rs11881821  | 19 | 1111895  | <i>SBNO2</i>                                  | <b>2.92E-02</b> | 5.39E-05 | -4.02E+00 | 1.18E-02 | -2.48E+00 |
| 97   | *rs12720356 | 19 | 10469975 | <i>TYK2</i>                                   | 9.30E-03        | 3.28E-03 | 2.91E+00  | 1.90E-04 | 3.70E+00  |
| 98   | rs117755928 | 19 | 47225377 | <i>STRN4/PRKD2</i>                            | <b>3.08E-02</b> | 1.56E-02 | -2.39E+00 | 2.63E-03 | 2.96E+00  |
| 99   | rs59491394  | 19 | 55389375 | <i>FCAR</i>                                   | 2.28E-02        | 1.24E-02 | 2.47E+00  | 7.99E-03 | -2.57E+00 |
| 100  | rs6072275   | 20 | 39743905 | <i>TOP1/RP1-1J6.2</i>                         | <b>4.77E-02</b> | 1.27E-02 | 2.45E+00  | 2.10E-03 | -3.02E+00 |
| 101  | *rs6031644  | 20 | 43156272 | <i>PKIG</i>                                   | 1.41E-03        | 6.35E-04 | 3.39E+00  | 4.80E-07 | -5.01E+00 |
| 102  | *rs259964   | 20 | 57824309 | <i>ZNF831</i>                                 | 3.29E-03        | 7.24E-05 | 3.94E+00  | 1.53E-02 | -2.36E+00 |
| 103  | *rs6062496  | 20 | 62329099 | <i>RTEL1-TNFRSF6B/ARF1/RP1/RTEL1/TNFRSF6B</i> | 1.44E-06        | 3.11E-09 | -5.91E+00 | 1.49E-02 | -2.40E+00 |
| 104  | rs2823286   | 21 | 16817938 | <i>NRIP1/USP25</i>                            | 6.23E-04        | 3.95E-11 | -6.59E+00 | 7.91E-03 | -2.63E+00 |
| 105  | rs4817988   | 21 | 40468838 | <i>ETS2/PSMG1</i>                             | 1.71E-04        | 7.03E-05 | -3.95E+00 | 2.10E-04 | -3.66E+00 |
| 106  | rs1893592   | 21 | 43855067 | <i>UBASH3A</i>                                | 5.66E-03        | 7.54E-04 | -3.35E+00 | 8.06E-03 | 2.60E+00  |
| 107  | *rs4456788  | 21 | 45616324 | <i>AP001057.1</i>                             | 1.71E-04        | 5.99E-05 | 3.99E+00  | 8.09E-03 | 2.61E+00  |
| 108  | *rs12484550 | 22 | 21941915 | <i>UBE2L3</i>                                 | <b>2.92E-02</b> | 1.60E-04 | 3.73E+00  | 9.47E-13 | -7.12E+00 |
| 109  | rs1076137   | 22 | 30223991 | <i>ASCC2</i>                                  | 1.21E-02        | 5.74E-03 | 2.74E+00  | 2.70E-03 | 2.96E+00  |
| 110  | *rs2143178  | 22 | 39660829 | <i>AL031590.1</i>                             | 1.35E-05        | 1.23E-12 | -7.09E+00 | 7.92E-03 | 2.61E+00  |
| 111  | rs12172195  | 22 | 45813687 | <i>RIBC2/SMC1B</i>                            | 1.60E-02        | 7.87E-03 | -2.60E+00 | 2.81E-04 | 3.59E+00  |

The locus number (loci), leading SNP (LeadingSNP), chromosome number (Chr), genomic position (Pos), gene symbols (Genes), minimum conjFDR value (Min conjFDR), *P-values* for CD (P\_CD), Z scores for CD (Z\_CD), *P-values* for UC (P\_UC) and Z scores for UC (Z\_UC) were listed in columns from left to the right. SNPs in the extended MHC region were removed before the analysis. Loci identified by the subset-based meta-analysis method were

marked by stars to the leading SNPs. The minimum conjFDR value above the expected FDR (0.025) from Liley and Wallace model<sup>14</sup> are marked by bold font.

## Supplementary Figures

**Supplementary Figure 1. Manhattan plot of ImmunoChip subset-based meta-analysis (SBM) association statistics ( $P_{\text{SBM}}$ ) of 130,052 SNPs.** Red horizontal line indicates a genome-wide significance threshold of  $5 \times 10^{-8}$ . SNPs within 166 non-MHC risk loci achieve the genome-wide significance threshold for association in the combined analysis of ankylosing spondylitis (AS), Crohn's disease (CD) psoriasis (PS) and primary sclerosing cholangitis (PSC) and ulcerative colitis (UC) QCed ImmunoChip data (**Supplementary Table 1**). Association  $P_{\text{SBM}}$  values at chr1p31.3 (*IL23R*) and chromosome 6 region at 25–34 Mb, encompassing the HLA region, fall below  $P_{\text{SBM}}=1 \times 10^{-100}$ .

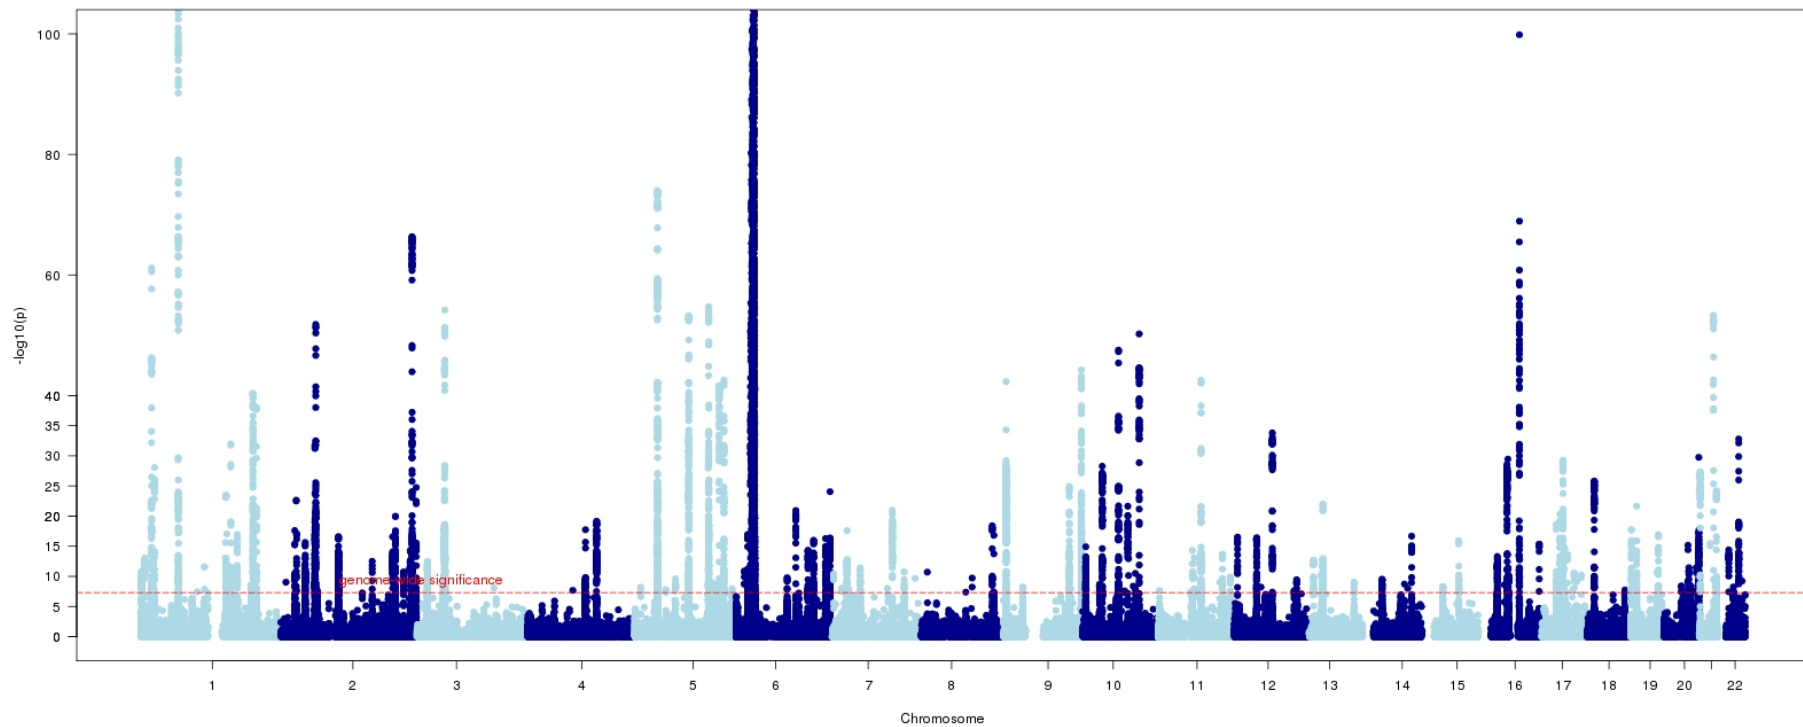

**Supplementary Figure 2. Ideogram summary plot of the 27 newly identified single disease association with genome-wide significance ( $P_{\text{disease}} < 5 \times 10^{-8}$ ).**

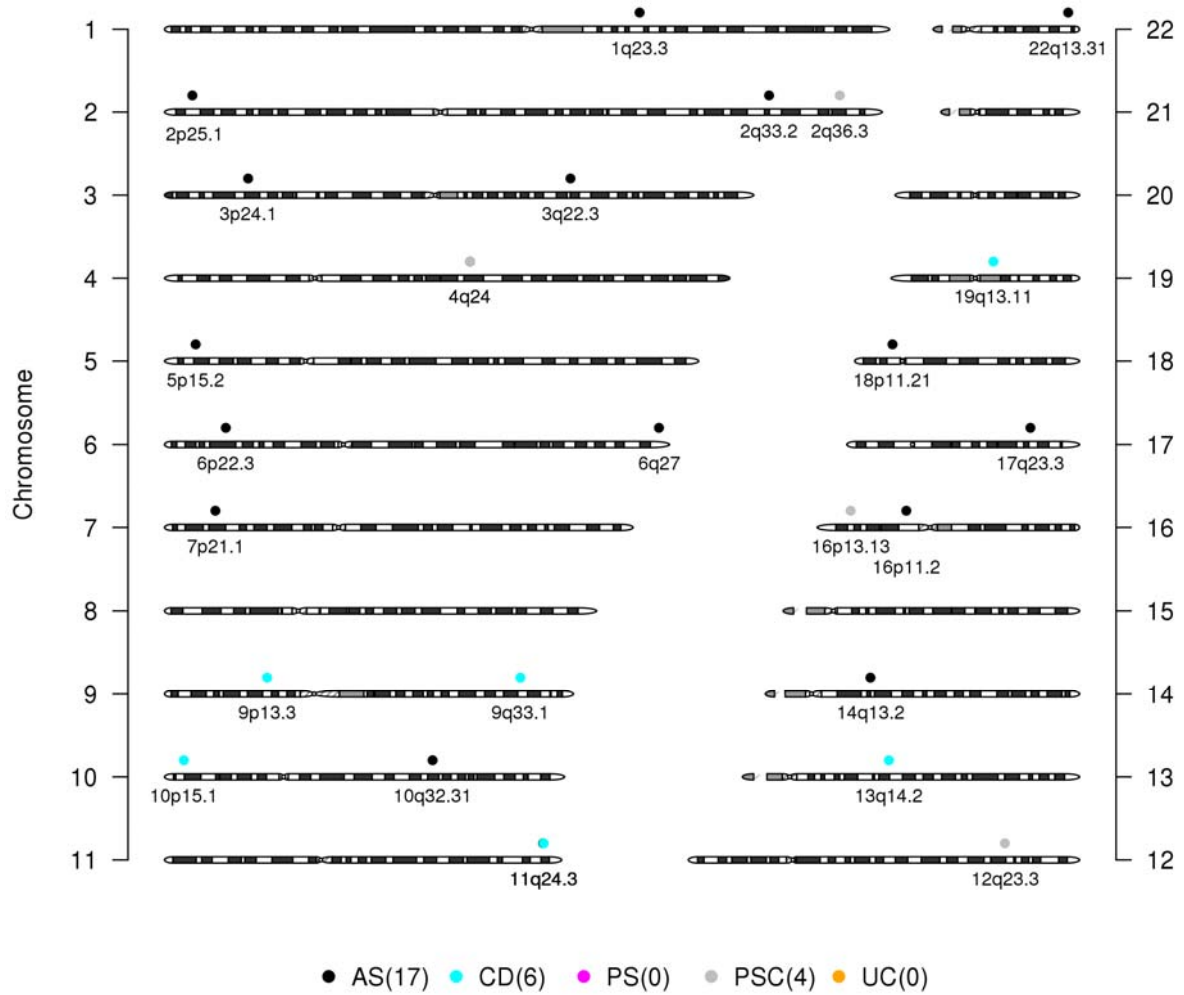

**Supplementary Figure 3. Ideogram summary plot of the 169 genome-wide significant non-MHC risk loci from cross-disease subset-based association meta-analysis (SBM) of ankylosing spondylitis (AS), Crohn's disease (CD) psoriasis (PS) and primary sclerosing cholangitis (PSC) and ulcerative colitis (UC).** By performing primary SBM analyses, we identified 166 genome-wide significant non-MHC loci ( $P_{\text{SBM}} < 5 \times 10^{-8}$ ). 3 out of 166 loci (bold type loci: rs2042011 at 8q24.21; rs2812378 at 9p13.3; rs1893592 at 21q22.3) have not been reported previously for any of the five diseases and thus are new gws shared risk loci. Further by performing single disease analyses on any SNPs that achieved  $P_{\text{SBM}} < 5 \times 10^{-7}$  in the primary SBM analysis, we identified 27 novel genome-wide significant disease associations ( $P_{\text{disease}} < 5 \times 10^{-8}$ ; see **Figure 1** and **Supplementary Fig. 2**). 24 out of these 27 associations were also genome-wide significant in the primary SBM analyses ( $P_{\text{SBM}} < 5 \times 10^{-8}$ ). The remaining three associations had  $5 \times 10^{-8} \leq P_{\text{SBM}} < 5 \times 10^{-7}$  and  $P_{\text{disease}} < 5 \times 10^{-8}$  thus leading to a total of 169 non-MHC risk loci. Using subset-based stepwise regression (see **Methods**), we identified 244 independent association signals within the 169 non-MHC risk loci (for summary statistics see **Supplementary Table 3a**), with 187 signals (not necessarily restricted to genome-wide significance in individual disease cohorts, see **Stepwise subset-based conditional logistic regression**) being shared by at least two diseases. By way of illustration, we added the major histocompatibility complex (MHC, chromosome 6 region at 25–34 Mb) which is a known susceptibility locus for AS, CD, PS, PSC and UC.

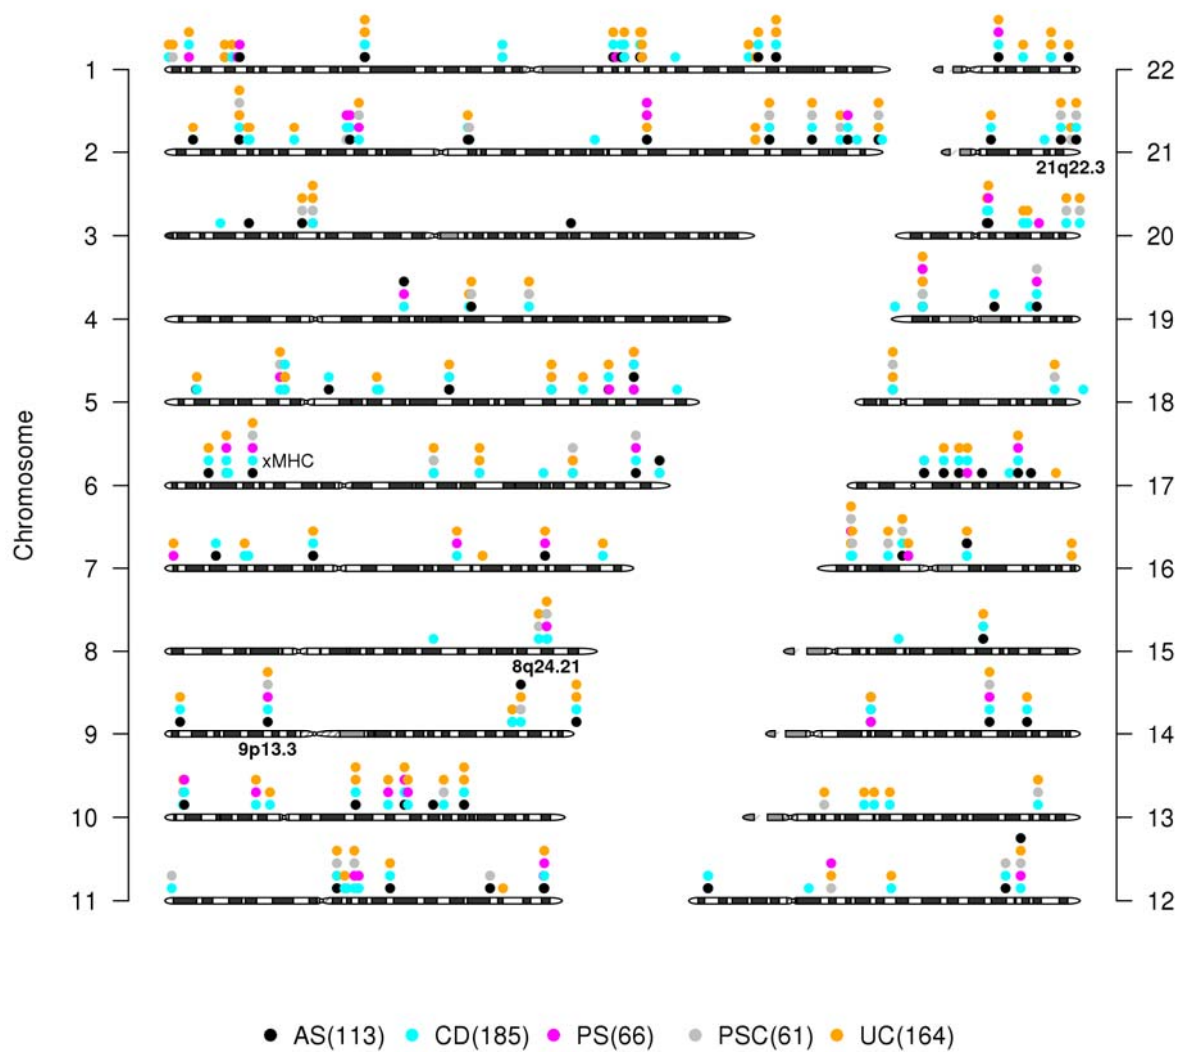

**Supplementary Figure 4. Regional association plots for 244 independent association signals within 169 gws non-MHC risk loci ( $P_{\text{SBM}} < 5 \times 10^{-8}$  or ( $P_{\text{SBM}} < 5 \times 10^{-7}$  and  $P_{\text{disease}} < 5 \times 10^{-8}$ )).**

**SEE PDF**

Blue shaded region corresponds to locus association boundaries (**Supplementary table 3a** and **Methods**). Shown are the  $-\log_{10} P$ -values from ImmunoChip analysis ( $P_{\text{SBM}}$  in **Supplementary table 3a**) with regard to the physical location of markers. **Purple circle:** lead SNP; **Other filled circles:** analyzed SNPs where the fill color corresponds to the strength of linkage disequilibrium ( $r^2$ ) with the lead SNP (for color coding see legend in the upper left corner of each plot); **line:** recombination intensity (cM/Mb). Positions and gene annotations are according to NCBI's build 37 (hg19). Plots were generate using LocusZoom<sup>15</sup>.

**Supplementary Figure 5. Synthesis-View<sup>16</sup> plots showing the multi-disease association signals for 244 independent association signals within 169 gws non-MHC risk loci ( $P_{\text{SBM}} < 5 \times 10^{-8}$  or ( $P_{\text{SBM}} < 5 \times 10^{-7}$  and  $P_{\text{disease}} < 5 \times 10^{-8}$ )).**

**SEE PDF**

**$-\log_{10} P$ -value:**  $-\log_{10} P$ -values from ImmunoChip analysis ( $P_{\text{SBM}}$  in **Supplementary table 3a**) with regard to the physical location of markers; direction of triangle denotes direction of disease-individual effect; **Beta:** effect size from the five single disease vs. control subsearches (natural logarithm of OR(disease) in **Supplementary table 3a**); **OR:** odds ratio from the five single disease vs. control subsearches (OR(disease) in **Supplementary table 3a**). Large circles denote nominal significant disease-individual  $P$ -values ( $P_{\text{disease}} < 0.05$ ); **CAF cases/controls:** case/control minor allele frequency.



**Supplementary Figure 6. Pair-wise comparisons of variance explained per risk variant between ankylosing spondylitis (AS), Crohn's disease (CD) psoriasis (PS) and primary sclerosing cholangitis (PSC) and ulcerative colitis (UC) for a maximum of 244 independent signals from 169 risk loci.** Each plot shows the comparison of variance between a pair of diseases (see **Methods**). The disease with the higher explained variance in total is shown on the left side. Each box represents an independently associated SNP for the given disease, if the locus is associated with disease. The size of each box is proportional to the amount of variance explained in disease liability for that variant. Per disease, only SNPs having the disease among the best disease set are included (see columns PHENO\_SBM\_RISK and PHENO\_SBM\_PROTECTIVE in **Supplementary Table 3a**). The colors of the boxes denote whether the difference in variance explained is due to different direction of effect (risk versus protective), significant heterogeneity of odds ratios ( $P < 0.01$ ) or both.

**SEE PDF**

**Supplementary Figure 7. Gene set enrichment analyses using precomputed gene sets reconstituted in DEPICT<sup>17</sup>.** DEPICT was run on SNP lists of each of the five diseases (**Supplementary Table 14**) separately. DEPICT performs enrichment tests for tissues and gene sets. For every tissue and every gene set we checked how many diseases were significantly enriched for that tissue or geneset. Results were separated into groups based on number of phenotype being involved, i.e. shared5, shared4, shared3, shared2 and non-shared, respectively. Shared5 shows the top 10 gene sets (pathways) or tissue/cell types that are significantly enriched (FDR adjusted  $P$ -values  $P_{FDR} < 0.05$ ) in all 5 diseases (i.e. AS, CD, PS, PSC and UC). The top 10 gene sets ordered by nominal  $P$ -value are: (1) positive regulation of immune system process, GO:0002684 (2) increased monocyte cell number, MP:0000220 (3) regulation of cytokine production, GO:0001817 (4) cytokine production, GO:0001816 (5) leukocyte activation, GO:0045321 (6) regulation of defense response, GO:0031347 (7) cytokine metabolic process, GO:0042107 (8) immune effector process, GO:0002252 (9) increased leukocyte cell number, MP:0000218 (10) regulation of immune response, GO:0050776

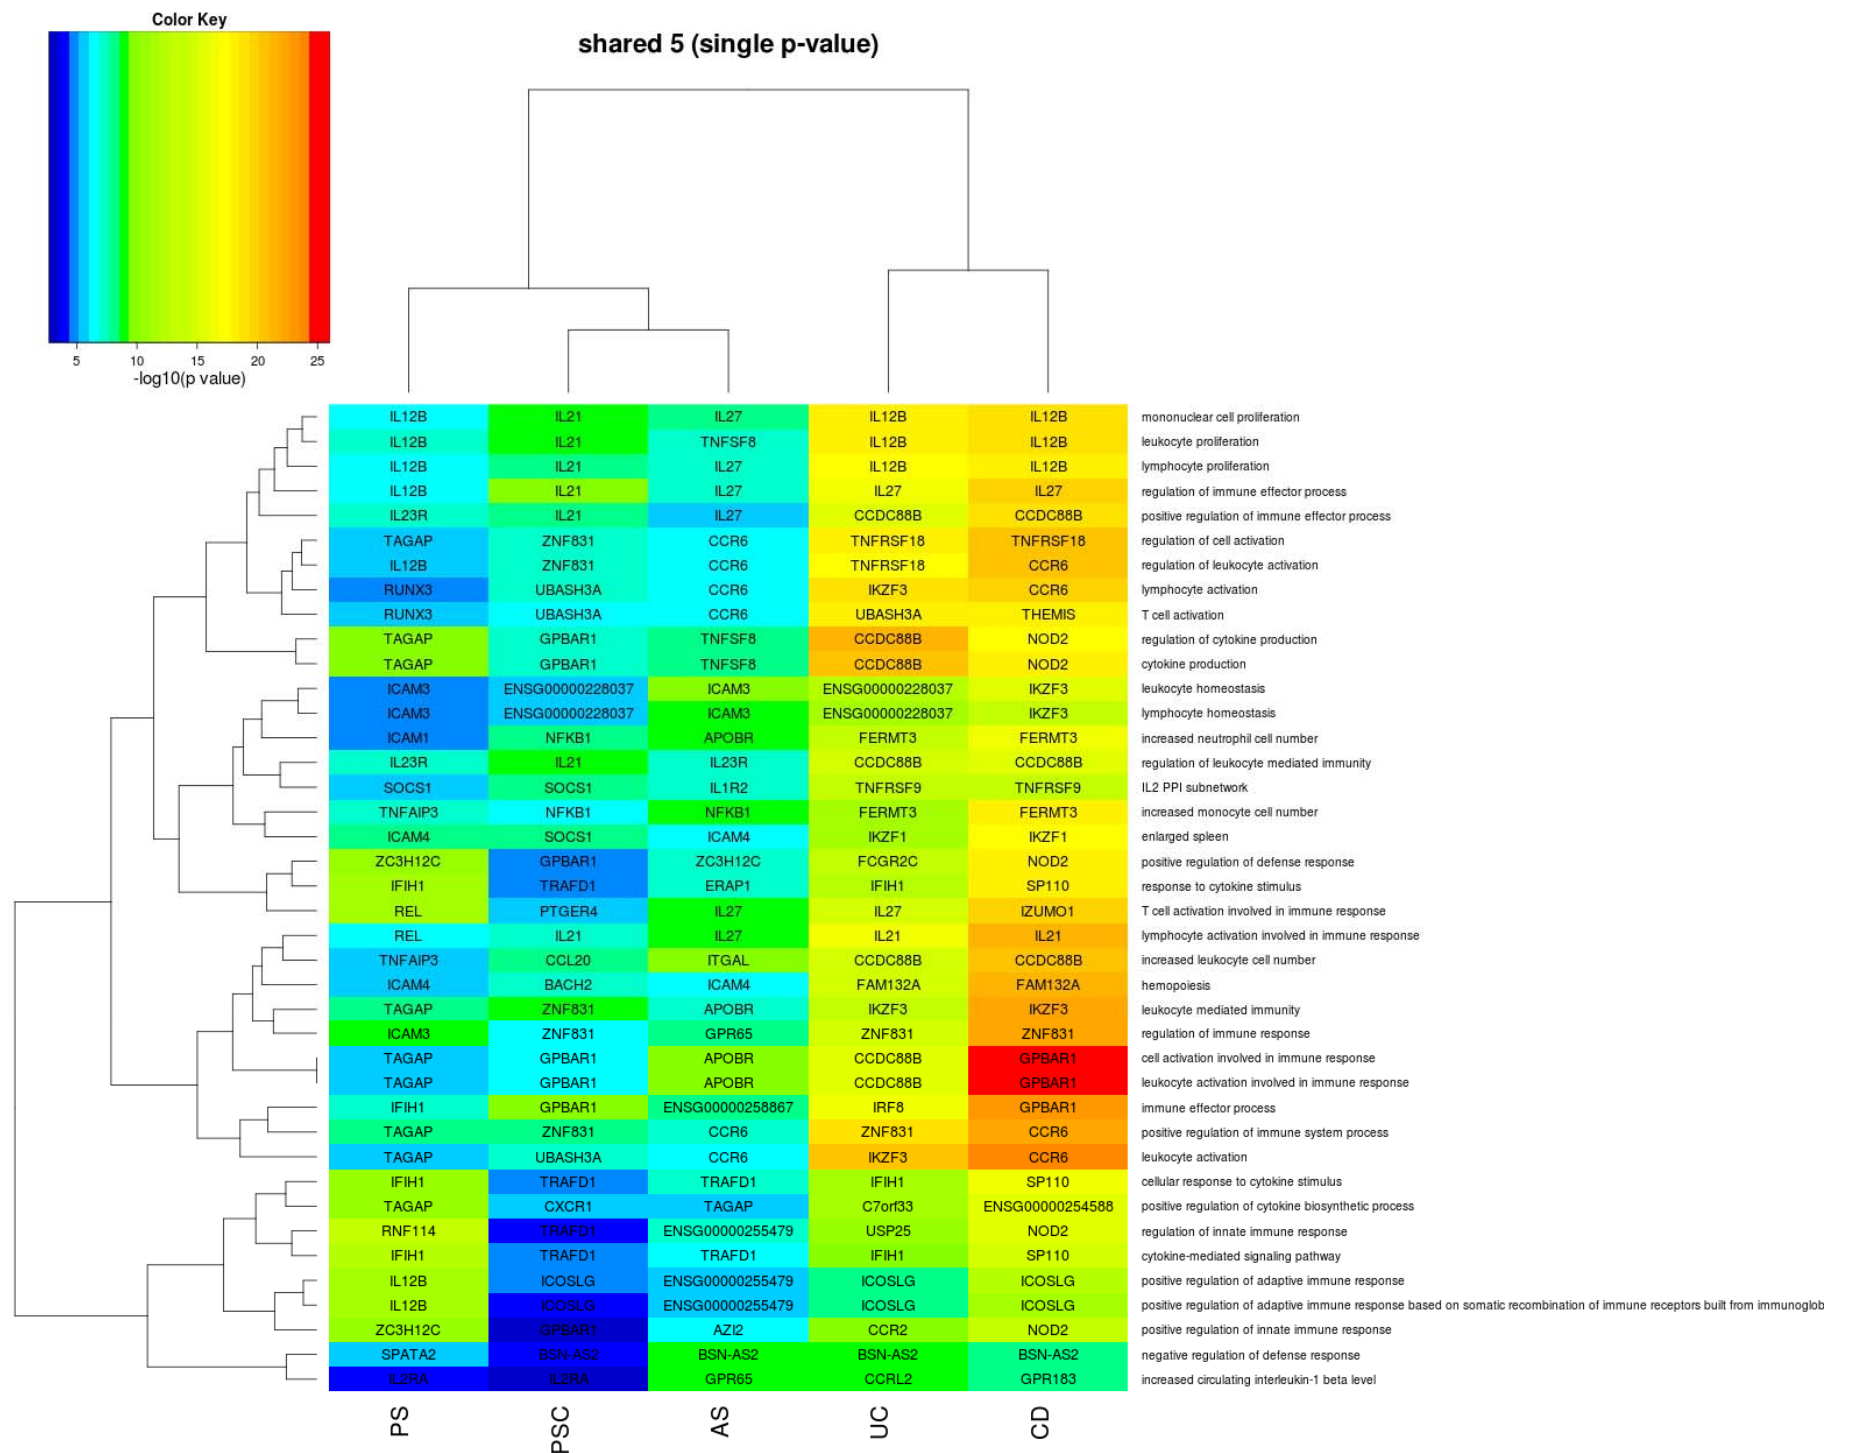

**Supplementary Figure 8. Tissue/cell type enrichment analyses using precomputed gene sets reconstituted in DEPICT<sup>17</sup>.** DEPICT was run on SNP lists of each of the five diseases (**Supplementary Table 14**) separately. Results were separated into groups based on number of phenotype being involved, i.e. shared5, shared4, shared3, shared2 and non-shared, respectively. Shared5 shows the top 10 gene sets (pathways) or tissue/cell types that are significantly enriched (FDR adjusted  $P$ -values  $P_{FDR} < 0.05$ ) in all 5 diseases (i.e. AS, CD, PS, PSC and UC). The top 10 cell types/tissues (MeSH terms) ordered by nominal  $P$ -value are: (1) Bone Marrow Cells, A15.378.316 (2) Hematopoietic System, A15.378 (3) Blood Cells, A15.145.229 (4) Leukocytes, A11.118.637 (5) Blood, A15.145 (6) Myeloid Cells, A11.627 (7) Phagocytes, A15.382.680 (8) Synovial Fluid, A02.835.583.443.800.800 (9) Monocytes, A15.378.316.580 (10) Leukocytes Mononuclear, A15.145.229.637.555

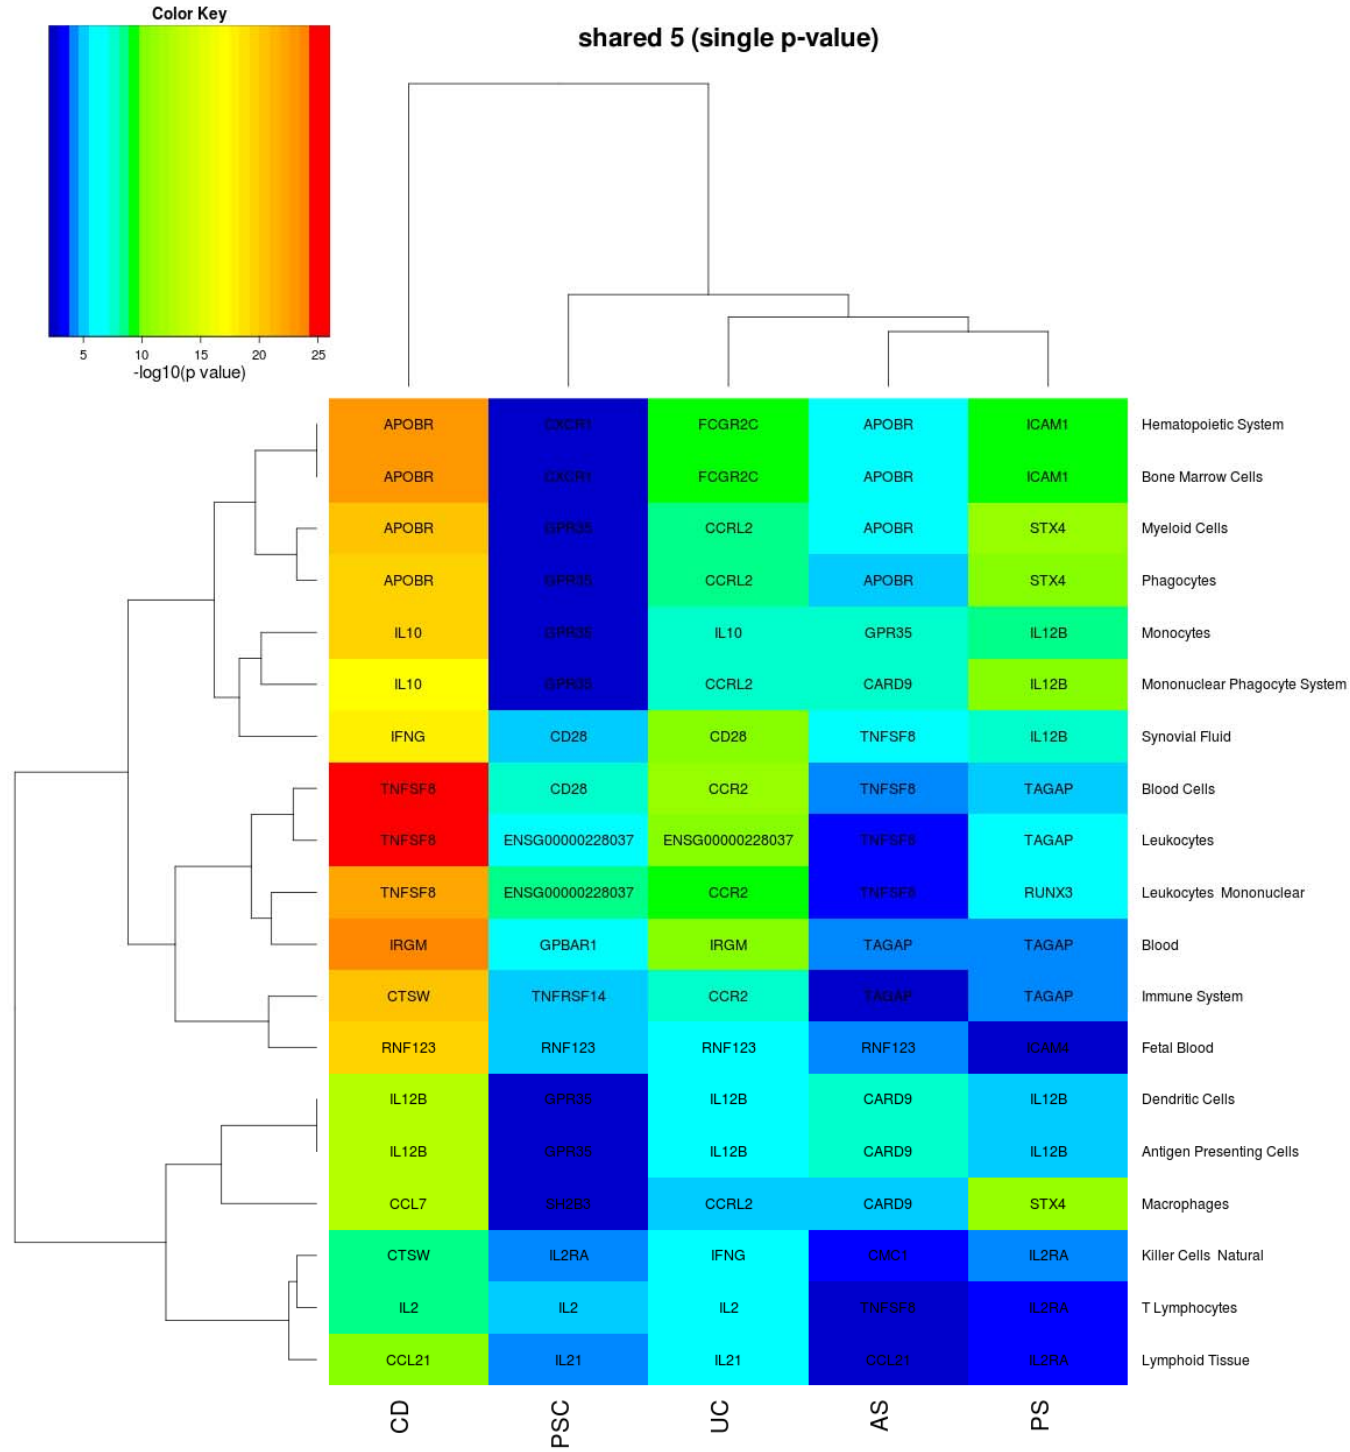

**Supplementary Figure 9. Protein-protein-interaction (PPI) network based on five prioritized gene sets from AS, CD, PS, PSC and UC SNP sets, respectively, from DEPICT analyses.** DEPICT performs gene prioritization and gene set enrichment based on these reconstituted gene sets (see **Methods**). The PPI reference database ConsensusPathDB (CPDB)<sup>18</sup> was filtered for interactions with >95% confidence and prioritized genes from DEPICT analyses on AS, CD, PS, PSC SNP sets (see **Methods**). This resulted in a network of 111 nodes and 65 edges.

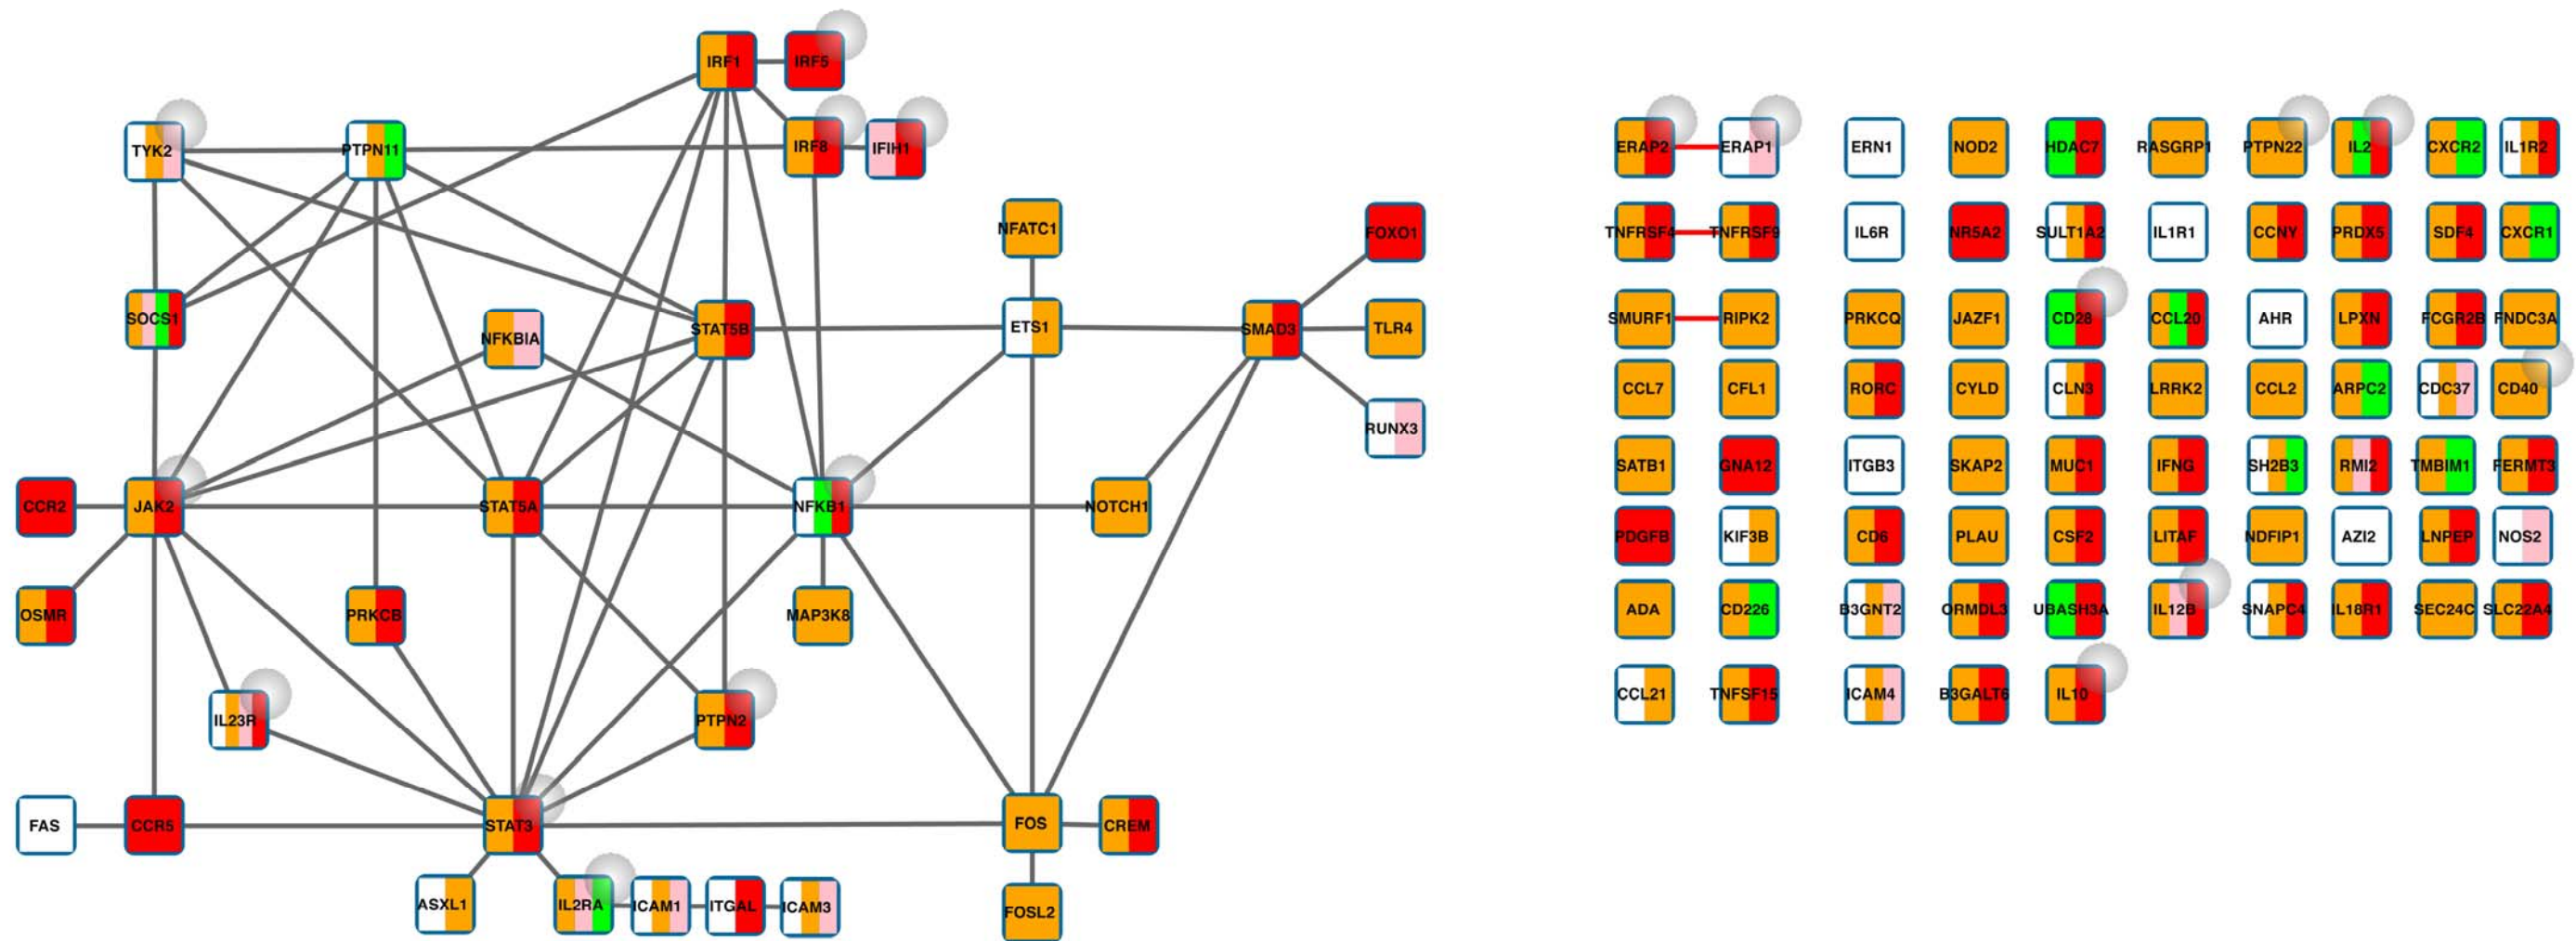

White: AS; Orange: CD; Pink: PS; Green: PSC; Red: UC; grey circles: Genes listed in Parkes *et al.*<sup>19</sup>

**Supplementary Figure 10. Statistical power analysis of BUHMBOX<sup>11</sup>.** For each power simulation 1,000 iterations were performed. To calculate power, we used the real effect sizes and allele frequencies of known loci, and simulated the same number of cases and controls as our sample size. The nominal significance threshold of 0.05 was used.  $\pi$  indicates the heterogeneity proportion (proportion of disease A cases that has genetic characteristics of disease B).

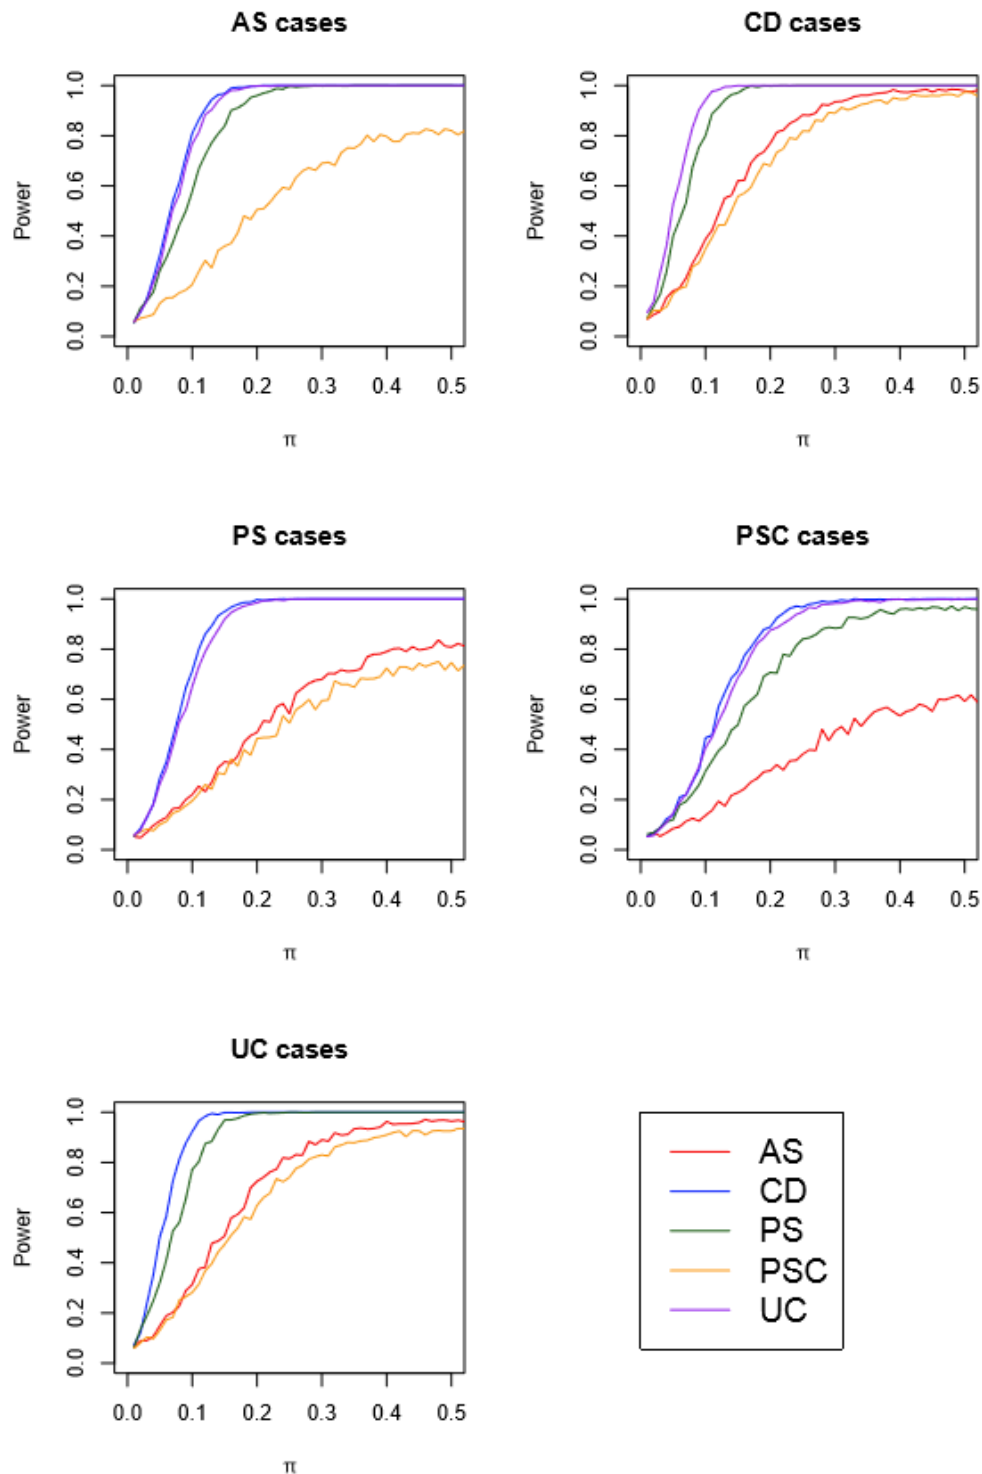

**Supplementary Figure 11. Estimates of SNP- $h^2$  in the observed scale for different control splits.** For each bivariate analysis controls were split into two groups at random.

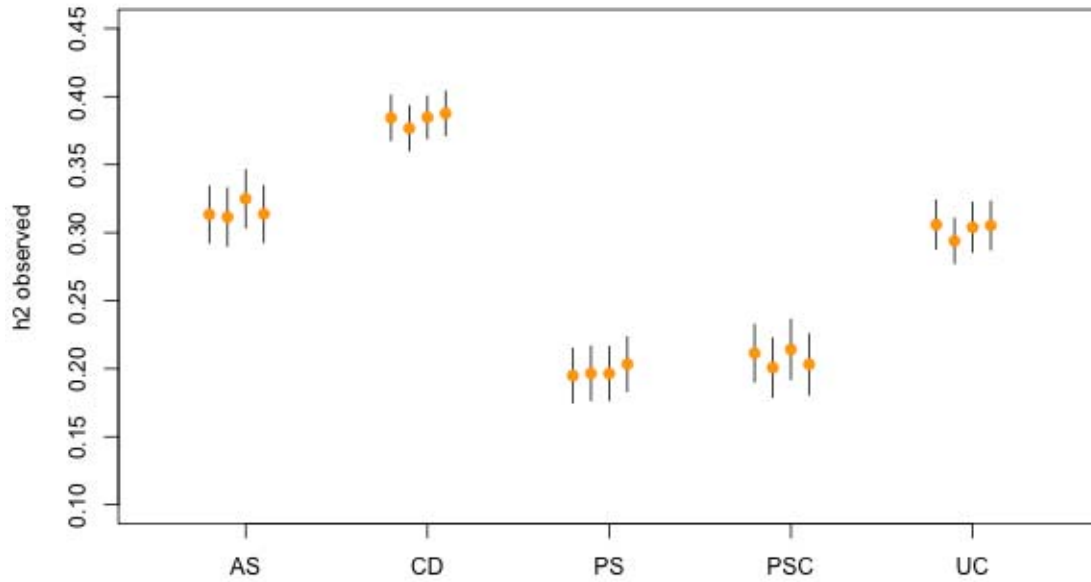

**Supplementary Figure 12. Estimation of ImmunoChip-wide pleiotropy excluding the MHC region.** Genetic and residual variances for the traits were estimated as well as the genetic covariance and the genetic correlation  $r_G$  (see **Supplementary Table 15**).

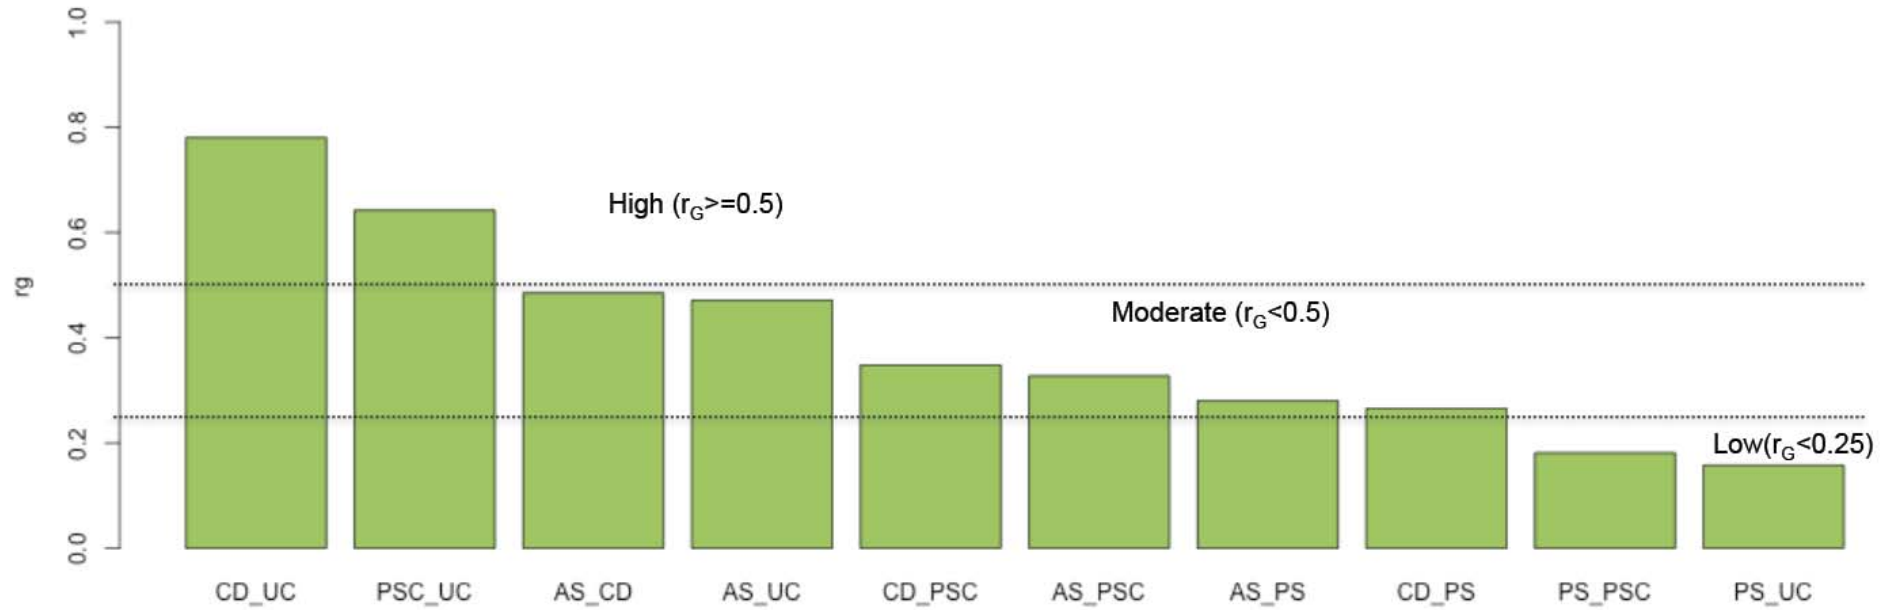

**Supplementary Figure 13. Negative control coheritability analysis (on liability scale with 95% error bars) between each disease under study and longevity, Bipolar disease, Major depressive disorder and Schizophrenia ImmunoChip studies.** For longevity (ageing), bipolar disorder (BIP), major depressive disorder (MDD) and schizophrenia (SCZ) studies we assumed prevalences of 0.01, 0.01, 0.15 and 0.01<sup>12</sup>.

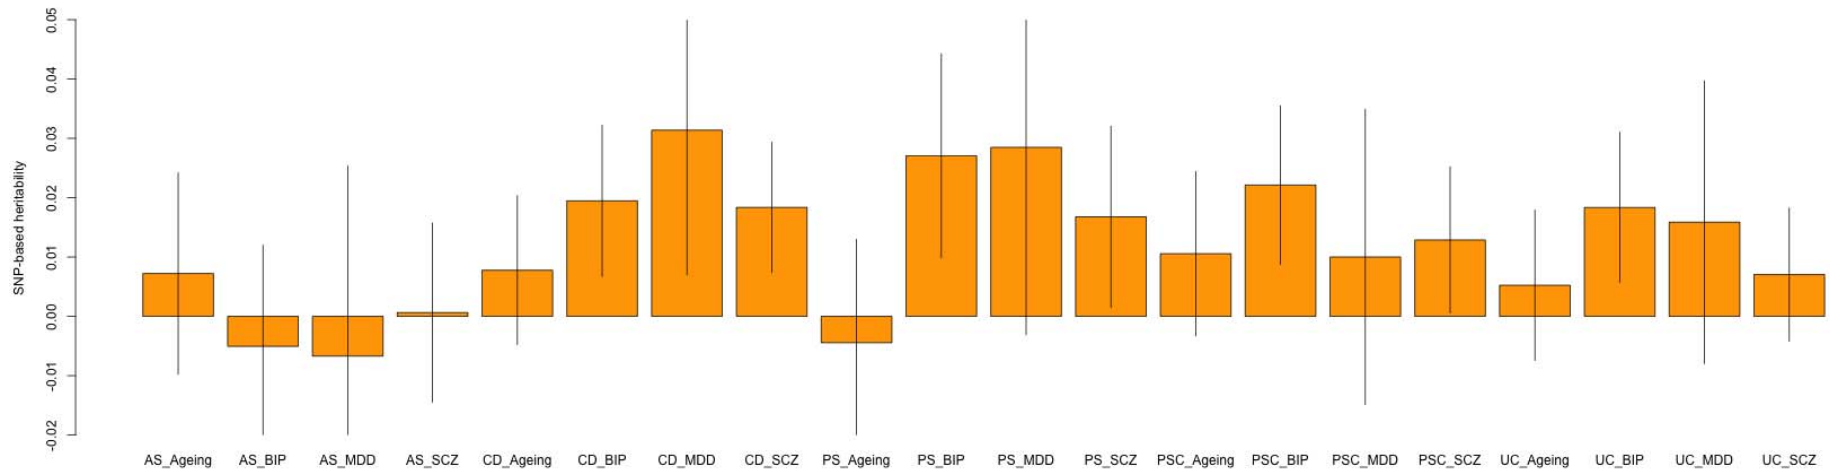



**Supplementary Figure 14. Test for difference in the mean allele frequencies (after correcting for population stratification) across different batches from a particular disease or the control group.** Allele dosages were regressed against top 7 principle components from principle component analyses (PCA) (see **Methods**) and residuals were obtained. *P* values were calculated from the ANOVA between the residuals of the genotypes and the batches. The null hypothesis is that all groups from a particular disease or from the group are simply random samples of the same population. Variants that had significantly different allele frequencies across the batches within phenotypic sets with a false discovery rate (FDR) threshold of 0.01 were removed. Variants that only failed one quality control criterion in a single batch were set to missing in the failed batch.

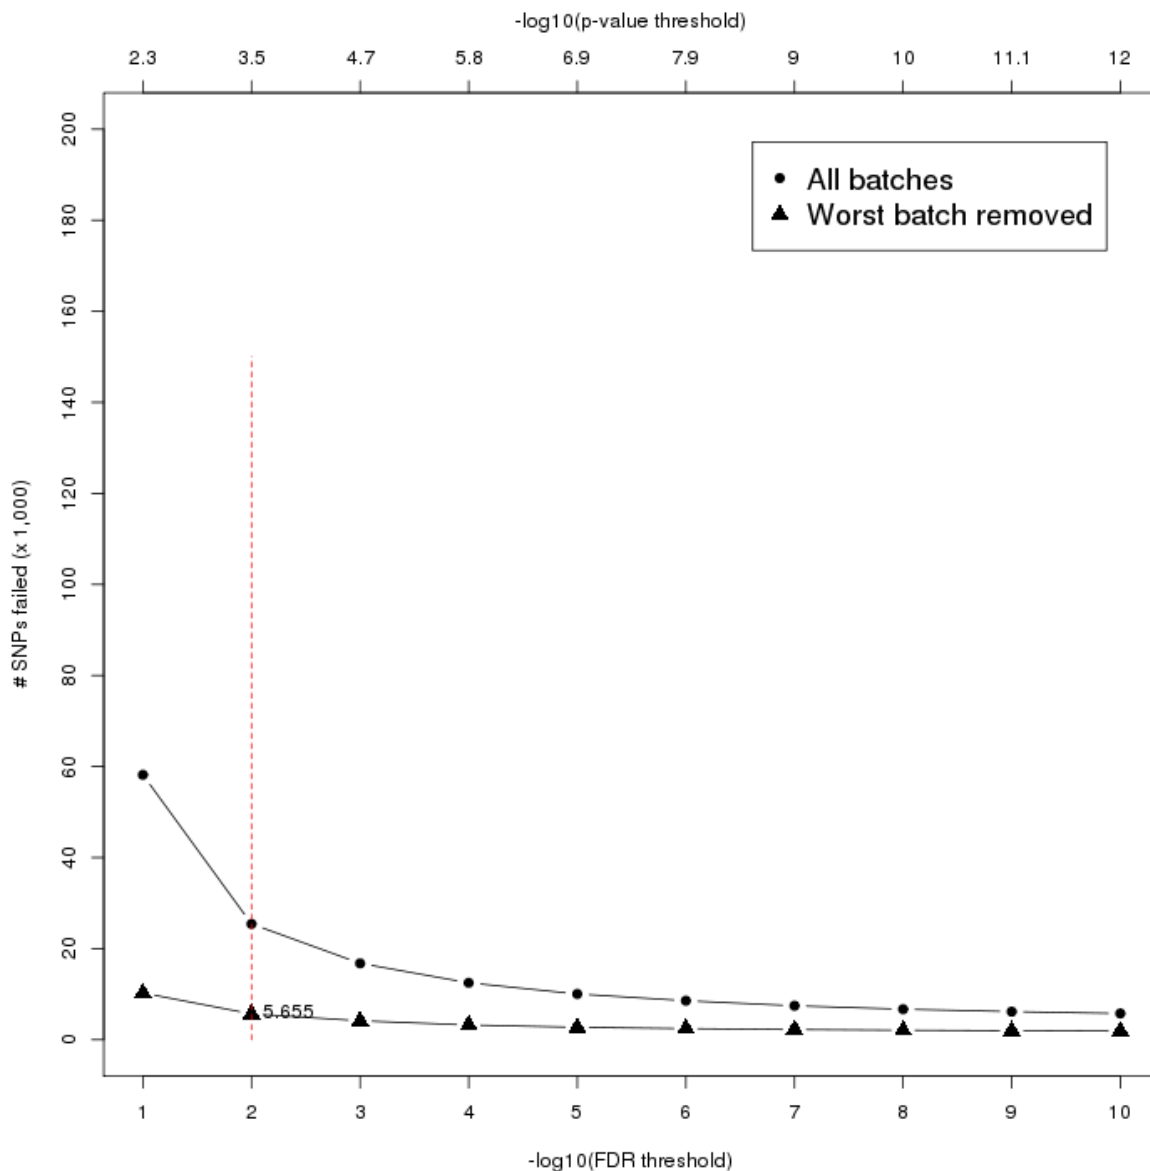

**Supplementary Figure 15. Variants that failure the Hardy-Weinberg equilibrium test in unaffected individuals at a false discovery rate (FDR) threshold of  $10^{-5}$  we removed. (a)** Number of variants that failed the Hardy-Weinberg test, for the sample of as a whole, with at most one batch being removed. **(b)** Number of variants that failed the Hardy-Weinberg test, within 40 individual batches, falling below the individual batch FDR threshold in two single batches. Variants that only failed one quality control criterion in a single batch were set to missing in the failed batch.

**(a)**

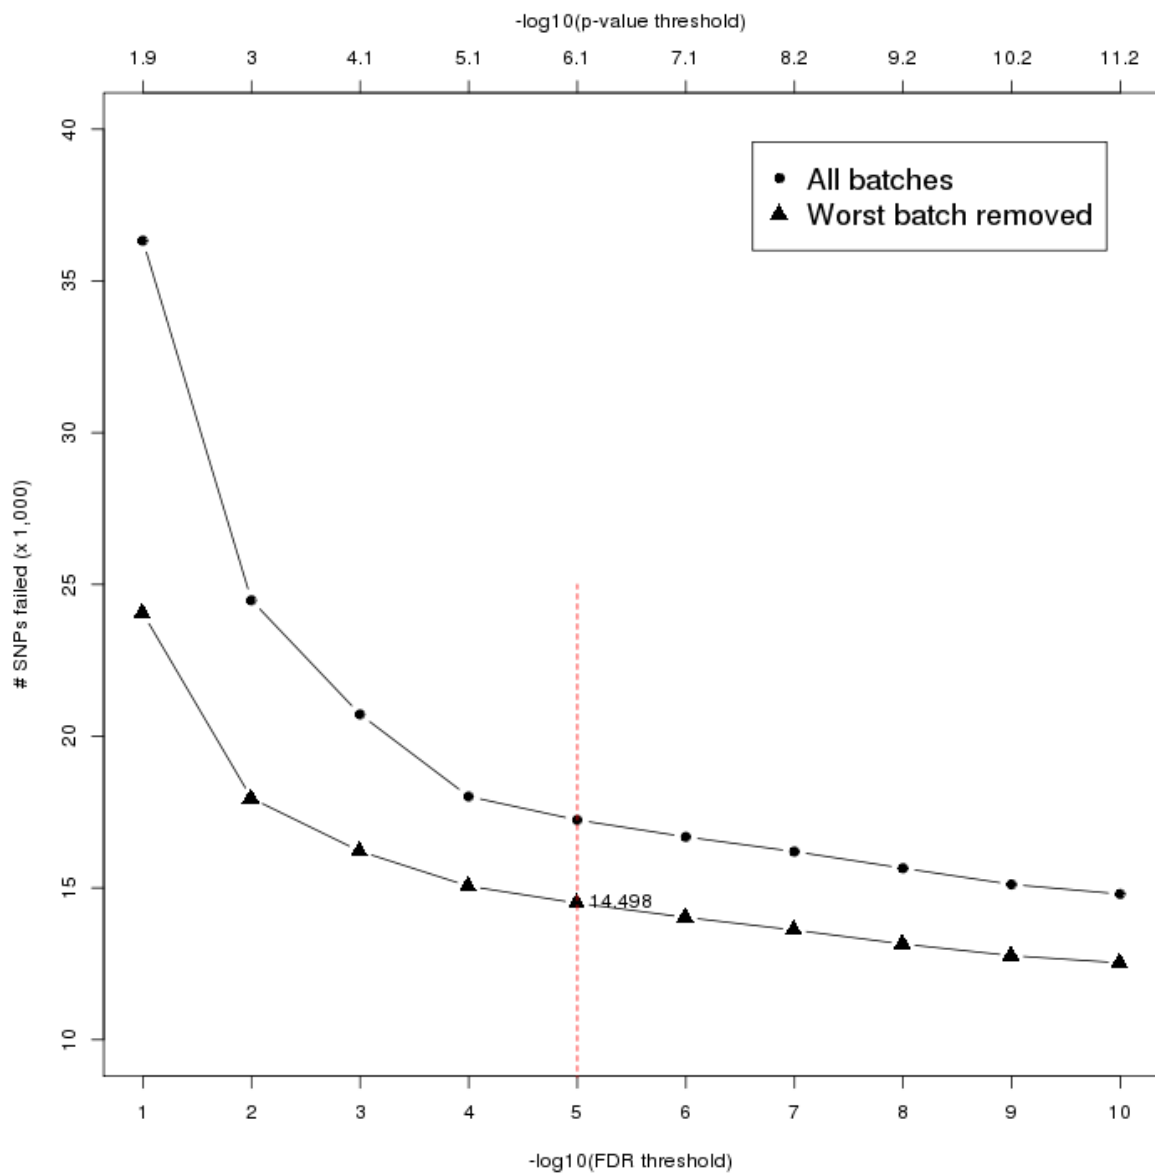

(b)

corresponding  $-\log(p\text{-values thresholds})$  different for any batch

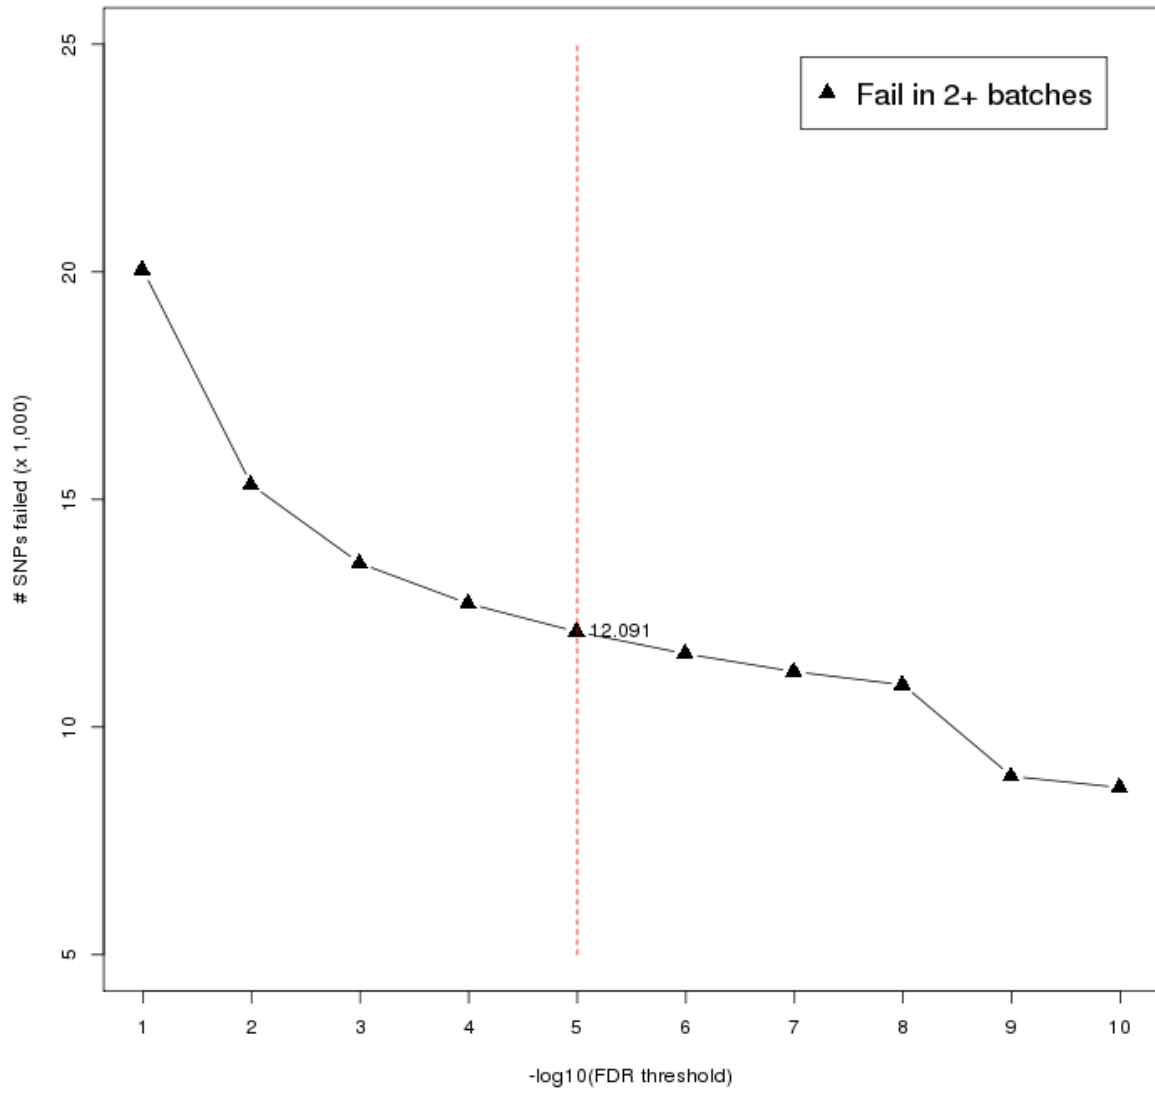

**Supplementary Figure 16. Individual missing data and heterozygosity.** Scatter plot of the proportion called missing (x-axis) against the proportion of SNPs called heterozygote (y-axis) for each individual in the study. 1,676 samples with >2% missing data and 51 outlier samples with an average marker heterozygosity of  $\pm 5$  s.d. away from the sample mean were excluded.

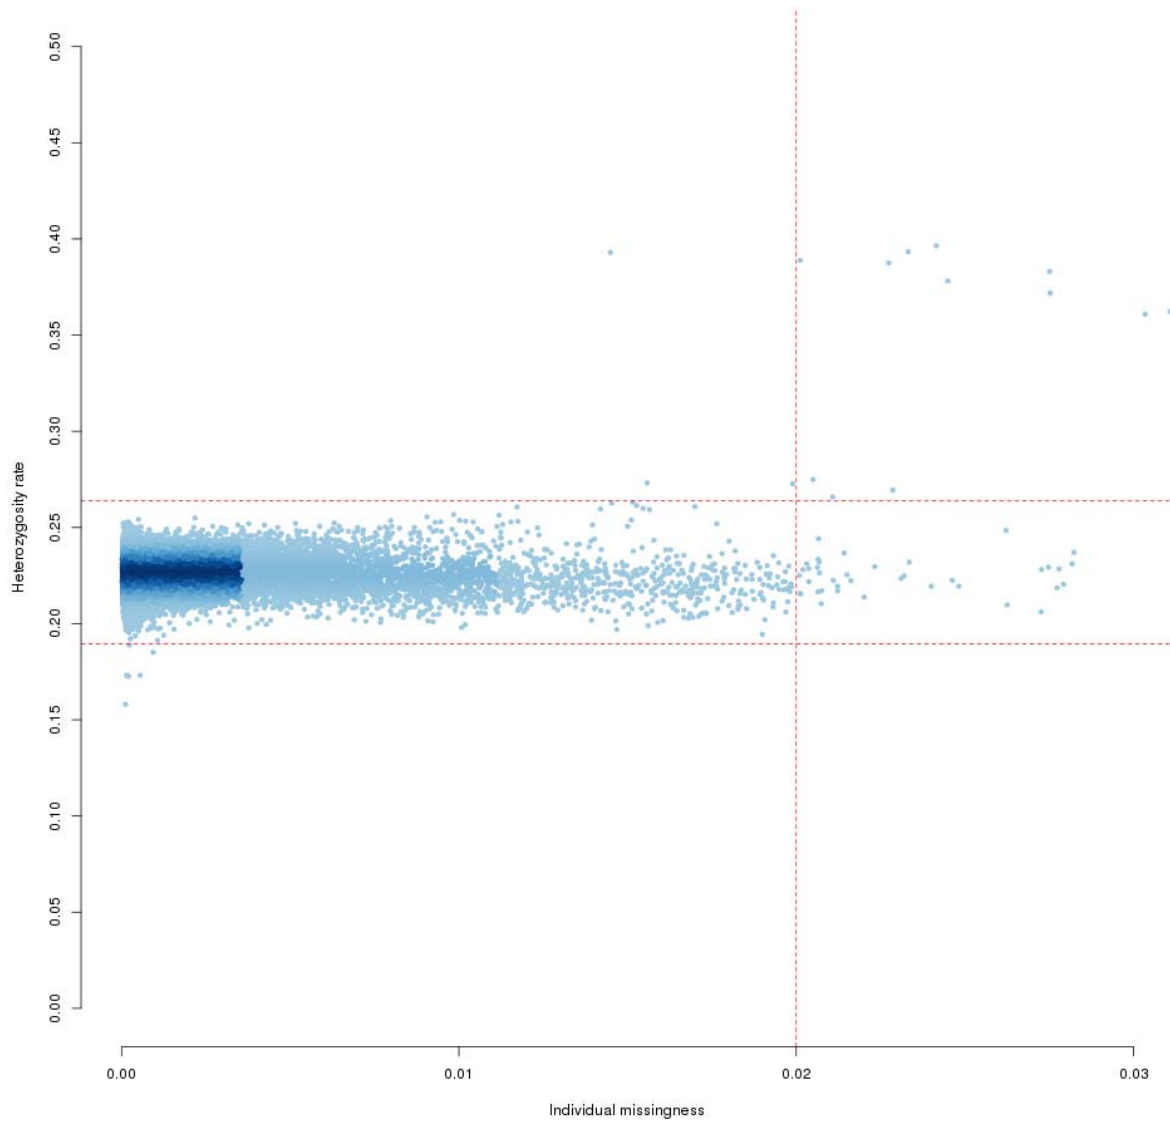

**Supplementary Figure 17. Principal component analysis of QCed ImmunoChip data.** (a) All ImmunoChip samples are plotted on the first two principal components colored by batch code. (b) Principal component pairs for the first four PCs. (c) Distribution of cases and controls along the first ten principal component stratified by phenotype. For the psoriasis data set (the blue curve), there is an overrepresentation of Estonian individuals which cluster a bit far from usual Western European individuals. Tracy-Widom statistics revealed that top seven axes of variation are significant and should be used as covariates in regression analyses (see **Supplementary table 16**). AS: ankylosing spondylitis; CD: Crohns’s disease; PS: psoriasis; PSC: primary sclerosing cholangitis; UC: ulcerative colitis

(a)

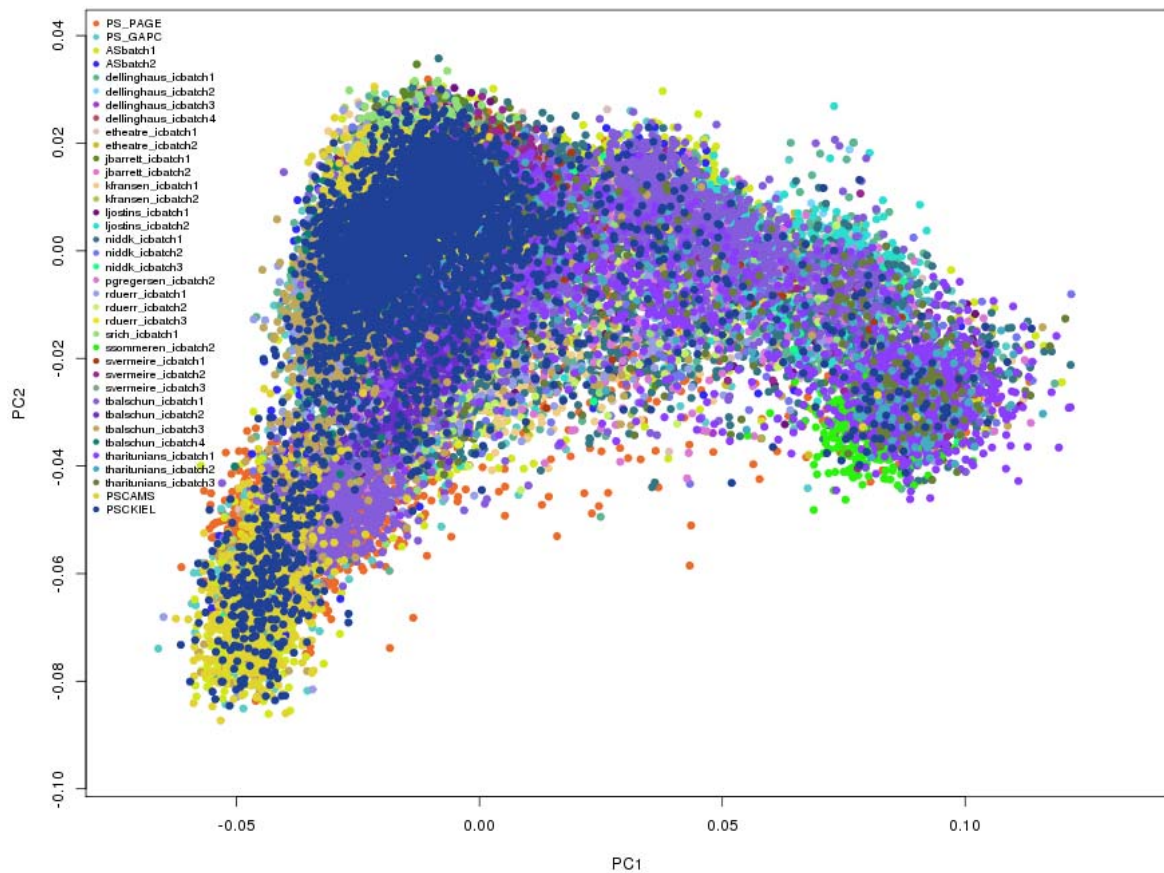

(b)

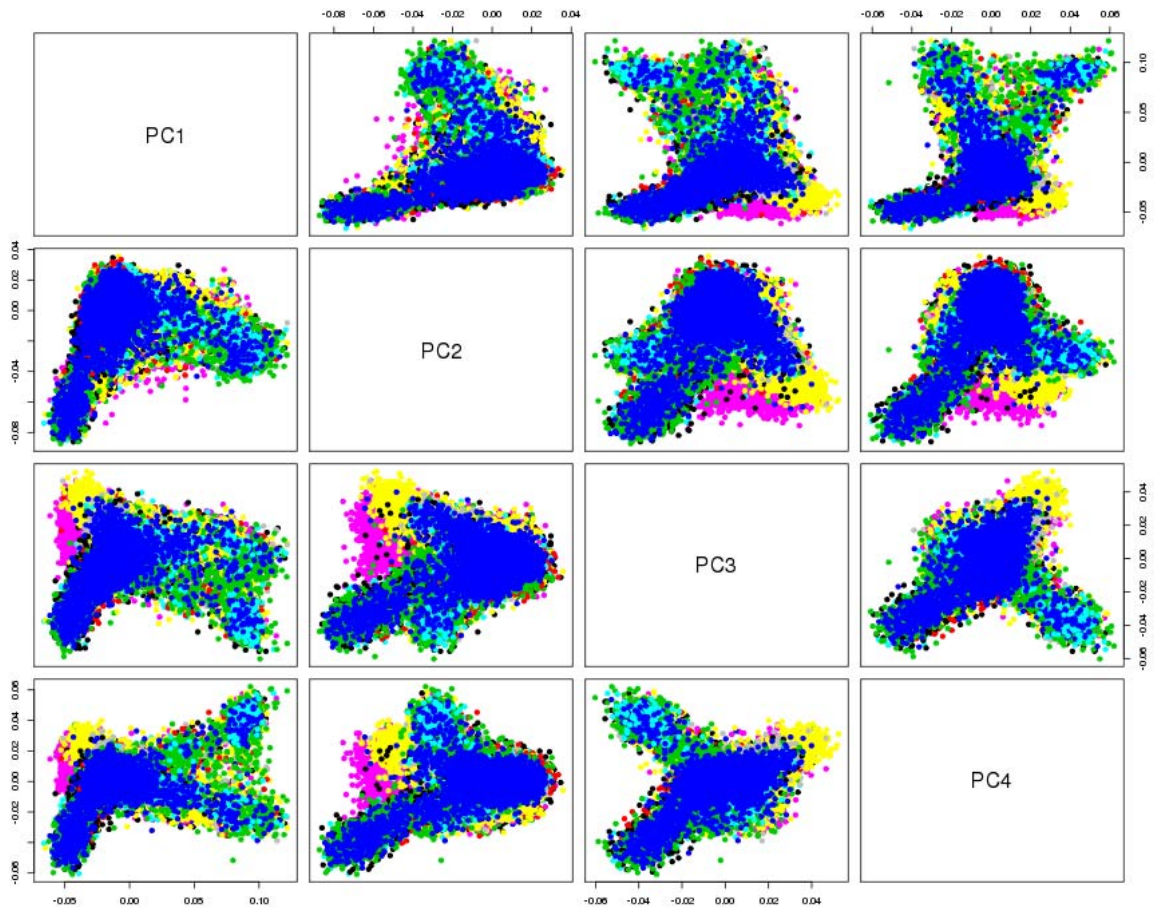

(c)

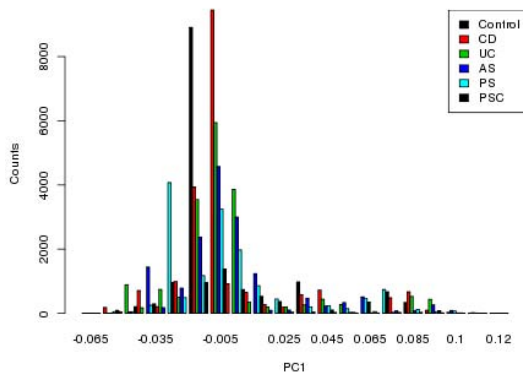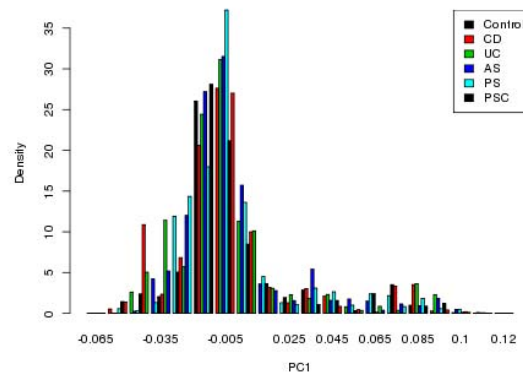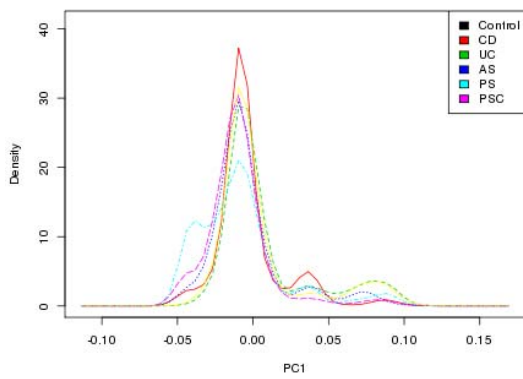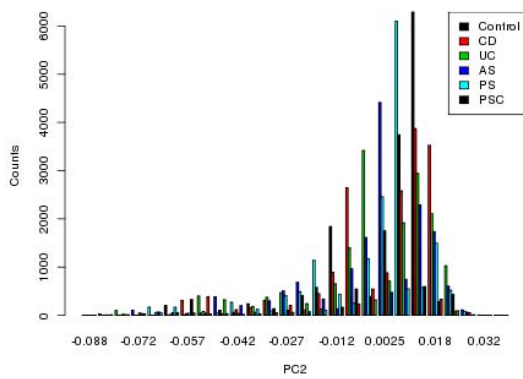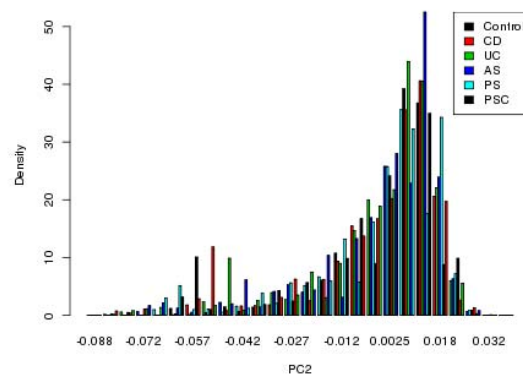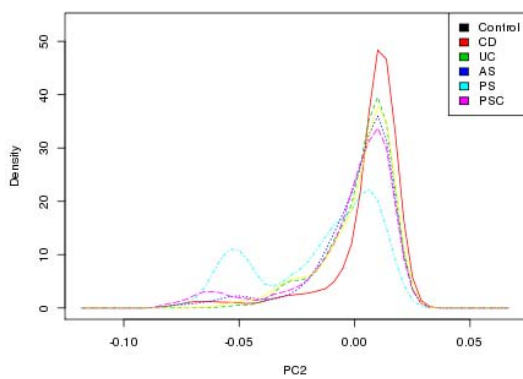

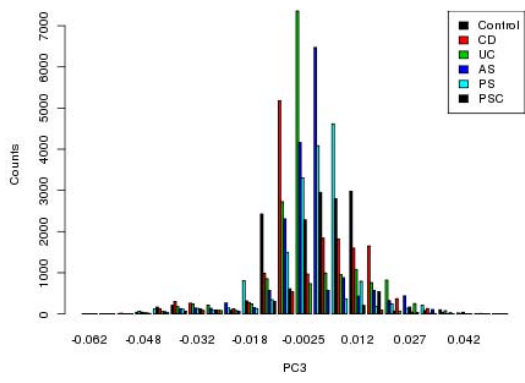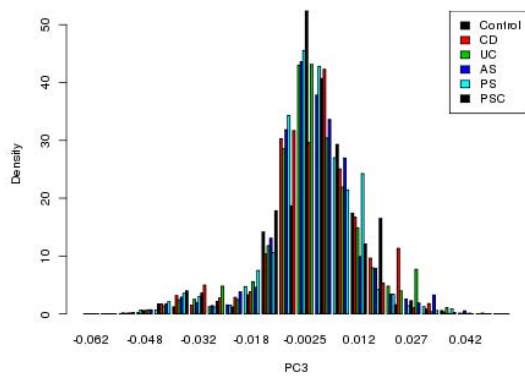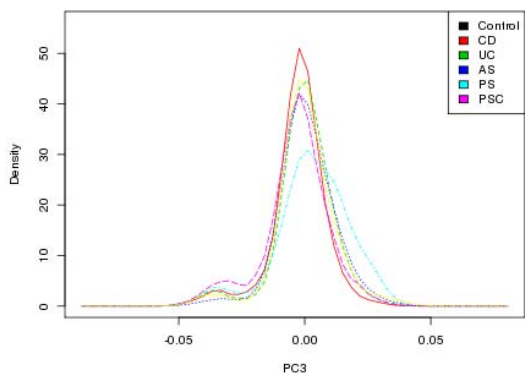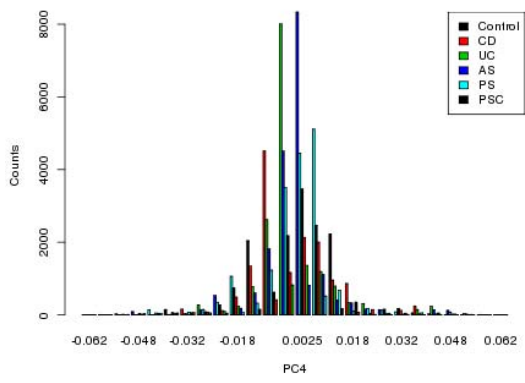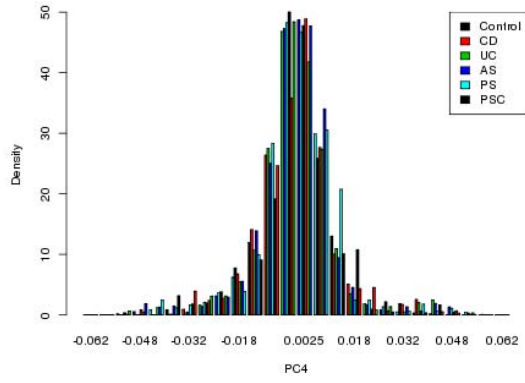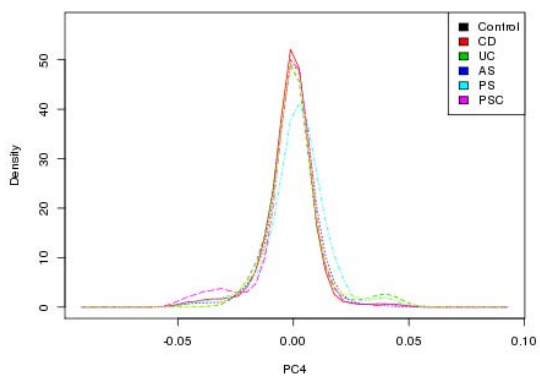



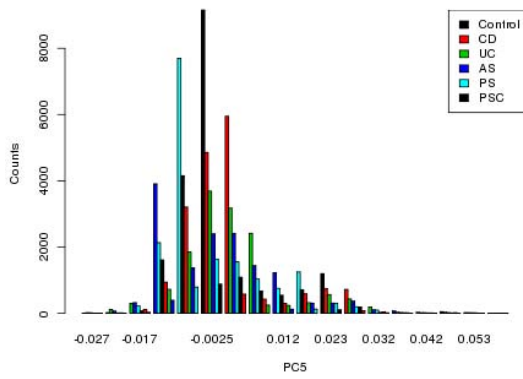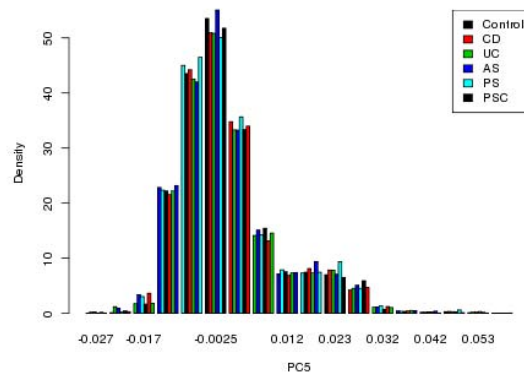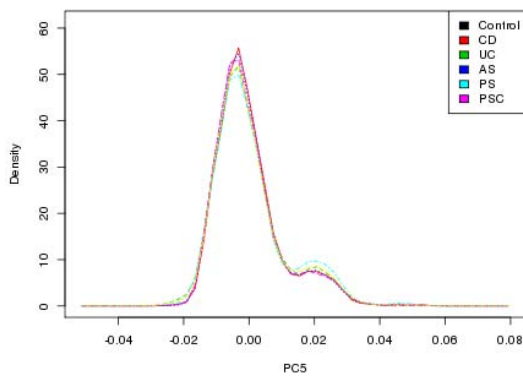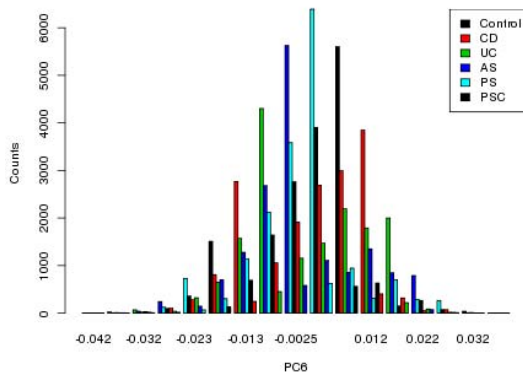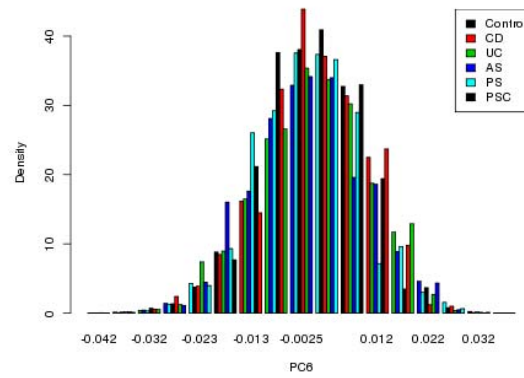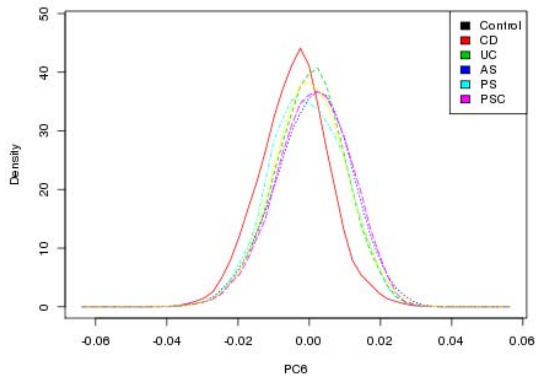

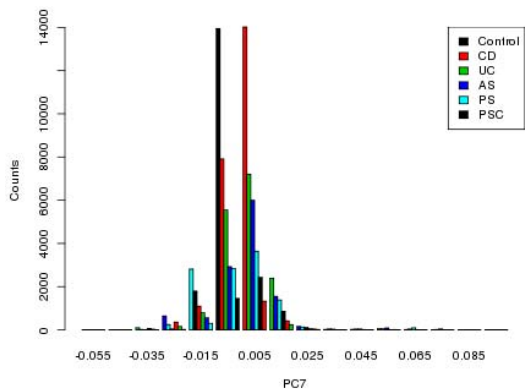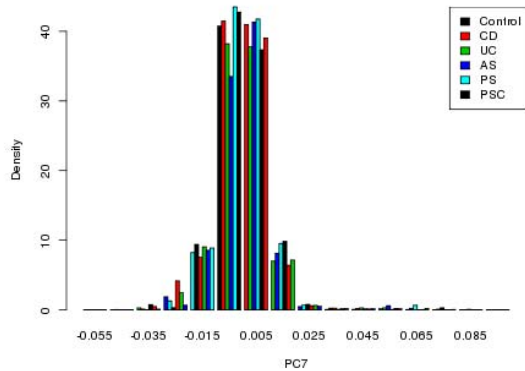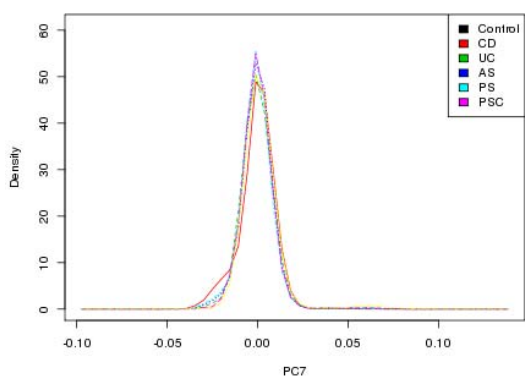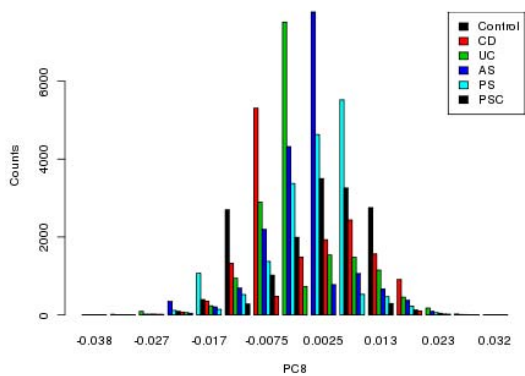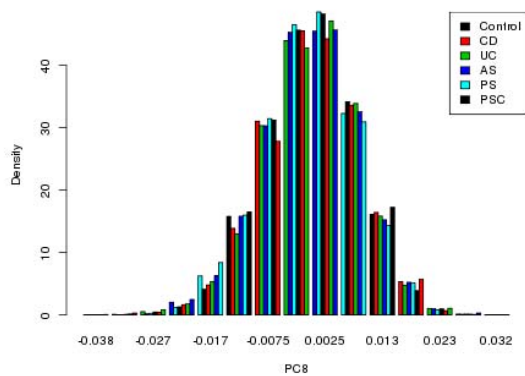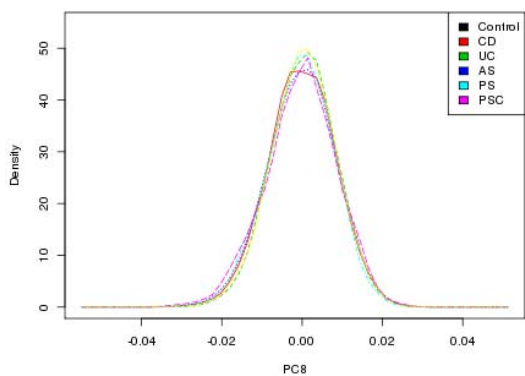

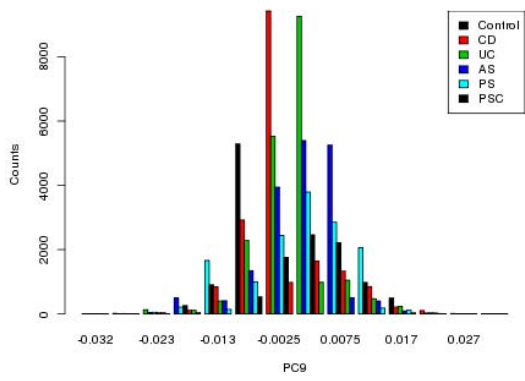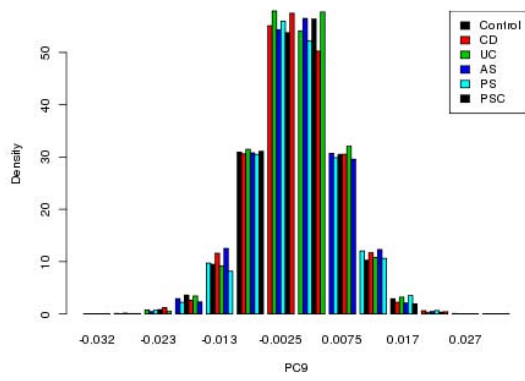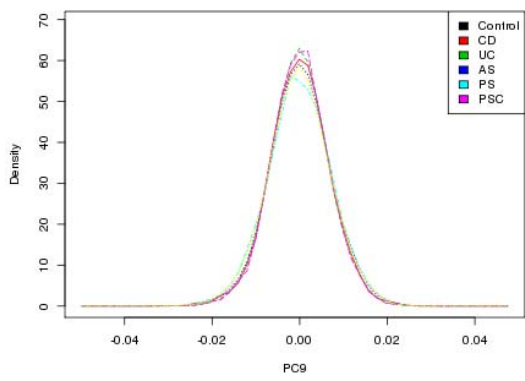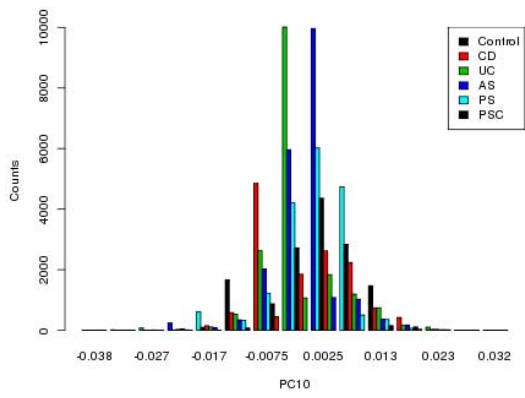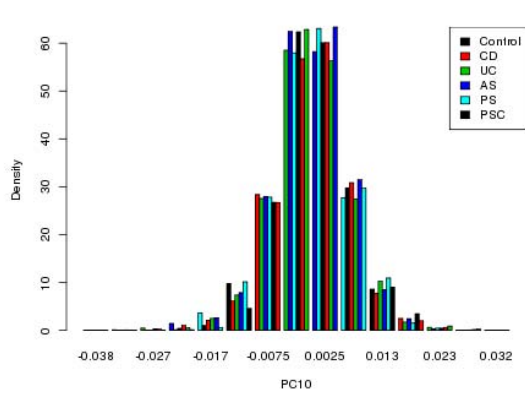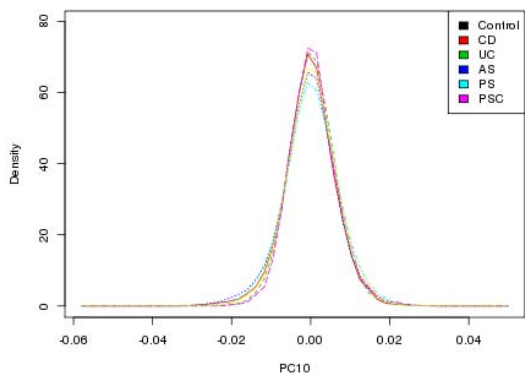

## Supplementary Note

### **eQTL analysis in peripheral blood**

We used *cis*-eQTL data from a total of 2,360 unrelated individuals obtained from three datasets with gene expression data measured from whole peripheral blood (1,240 individuals from Fehrmann-HT12v3, 229 individuals from Fehrmann-H8v2<sup>6</sup> and 891 individuals from the EGCUT study<sup>7</sup>) as described in a previous study<sup>20</sup>. In summary, quality controlled genotype data was imputed using the 1000 Genomes Phase 3 (March 2013 version) cosmopolitan reference panel<sup>21</sup> and imputation dosage values were used for analysis. A more detailed overview of the quality control has been published elsewhere<sup>20</sup>. To detect *cis*-eQTLs, we assessed only those combinations of SNPs and probes where the distance between SNP and the midpoint of the probe was smaller than 1 megabase (Mb). Individual datasets were meta-analyzed using a Z-score method, weighted for the sample size of each dataset. The sample labels were permuted (repeated 100 times) in order to obtain the *P*-value distribution used to control the FDR at 5%. Since SNPs can be highly correlated due to LD, *cis*-eQTL effects are often caused by SNPs in high LD with the disease-associated query SNP. In order to determine whether our disease-associated SNPs have independent *cis*-eQTL effects with respect to other SNPs in their locus, we performed conditional analysis. Using the procedure described above, we first determined which SNPs show the strongest *cis*-eQTL (eSNP) effect for each of the probes associated with the 244 disease-associated SNPs (gSNP). Then, we adjusted the gene expression data for these effects using linear regression, and repeated the *cis*-eQTL analysis on the disease-associated SNPs (and vice-versa). This analysis allowed us to identify disease-associated variants that were also the best *cis*-eQTL SNP.

### **Gene prioritization, pathway analysis and tissue/cell type enrichment analysis**

We used the analysis framework called Data-driven Expression Prioritized Integration for Complex Traits (DEPICT)<sup>17</sup> to determine most likely affected genes, pathways and tissue/cell types from associated loci. Based on 77,840 microarrays from two human, one rat and one mouse Affymetrix gene expression, DEPICT reconstituted 14,461 existing various pathways and gene sets<sup>22</sup>: 737 Reactome pathways<sup>23</sup>, 5,083 Gene Ontology terms<sup>24</sup>, 184 KEGG pathways<sup>25</sup>, and 2,473 phenotypic gene sets (based on 211,882 gene-phenotype pairs from the Mouse Genetics Initiative<sup>26</sup>) and 5,984 molecular pathways (based on 169,810 high-confidence experimentally-derived protein-protein interactions<sup>27</sup>). DEPICT performs gene prioritization and gene set enrichment based on these reconstituted gene sets and three major

steps: Quantification of similarity of a given gene to genes from other associated loci across all 14,461 gene sets (gene scoring step), adjustment for inflation in gene scores caused by gene length and structure in underlying expression data through 200 pre-permuted null Immunochip GWAS (bias adjustment step), and estimation of Immunochip-wide false discovery rates (FDRs) by repeating step 1 and 2 based (20 randomized runs) based on top SNPs from precomputed null Immunochip studies. Tissue/cell type enrichment analysis utilizes 37,427 human Affymetrix HGU133a2.0 platform microarrays to examine whether genes in associated loci are highly expressed in any of 209 Medical Subject Heading (MeSH) tissue and cell type annotations<sup>17,22</sup>.

DEPICT was run on each of the five diseases separately. The results were separated into groups based on number of phenotype being involved, i.e. shared5, shared4, shared3, shared2 and non-shared, respectively. For example, shared5 includes the top 10 gene sets (pathways) or tissue/cell types that are significantly enriched (FDR adjusted  $P$ -values  $P_{\text{FDR}} < 0.05$ ) in all 5 diseases (i.e. AS, CD, PS, PSC and UC) (**Supplementary Figure 7 and 8**). The “Non-shared” results depicts top 10 gene sets (pathways) or tissue/cell types significantly enriched in one disease ( $P_{\text{FDR}} < 0.05$ ) but in no other disease, thus showing disease-specific enrichments.

### **Enrichment analysis using GoShifter**

We used the Genome Annotation Shifter (GoShifter)<sup>28</sup> package to test for enrichment between SNPs in associated loci and genomic annotations. Specifically, we used annotations from the Fantom5<sup>8</sup> and NIH Roadmap Epigenomics<sup>9</sup> projects to look for enrichment of expressed enhancers and histone modifications, respectively. For the Fantom5 data, groups of samples (facets) were created based on ontology terms that were mutually exclusive and cover a broad range of functional annotations. Enhancers (regions of the genome that can be bound by transcription factors to activate transcription of a gene) were identified from cap analysis of gene expression (CAGE) across samples using single molecule sequencing<sup>8</sup>. Facet expressed annotations are robustly expressed enhancers that were significantly expressed in each contained sample within a facet. Facet differentially expressed annotations are expressed enhancers that significantly deviate in expression between facets (Bonferroni corrected  $P < 0.05$ )<sup>29</sup>. For Fantom5 data, where cell/tissue id begins 'CL' these are cell types, those beginning 'UBERON' are tissues. Cell/tissue types, enhancer types and number of facets that were tested are shown in **Supplementary Table 7**. For Roadmap annotations, we used the peak regions for the histone modifications H3K27ac, H3K4me3, H3K4me1, H3K9me3, and

H3K9ac. These marks are enriched at active promoters and enhancers or transcriptionally silent or repressed regions. Number of annotation cell types, modification type and suggested function are depicted in **Supplementary Table 8**.

The results from the association analysis were separated into groups based on phenotype (**Supplementary Table 9**). These groups were: "Shared3+" (variants that were associated with 3 or more phenotypes), variants associated with a phenotype, but not specific to that phenotype (IBD (variants associated with CD or UC), CD, UC, PSC, PS and AS) and "All variants" (all variants identified in the study regardless of phenotype). The PSC only group was not included owing to the small number of variants in this group.

GoShifter was run using default parameters, except, the number of permutations to perform was set to '10,000' and the `-no-ld` flag was set to 'False' in order to extend the analysis to variants in high LD with the lead variants. Peaks were called using MACS software (v2) with default parameters. For each annotation, the peak regions were used, which were called using  $q\text{-value} < 0.001$ . The 1000 genomes v3 project haplotypes were used to generate LD estimates between variants in the dataset and variants in 1000 genomes, therefore SNPs that were not present in the 1000 genomes dataset were removed from this analysis.

#### **Annotation of association boundaries**

Linkage disequilibrium regions (association boundaries) around independently associated SNPs were defined by extending in both directions a distance of 0.1 centimorgans (cM).

#### **Variance explained and heritability of single SNPs.**

The proportion of variance explained by each associated association signal per population was calculated using a liability threshold model<sup>30</sup> assuming a disease prevalence of 0.0055, 0.001, 0.012, 0.000039, 0.001 for ankylosing spondylitis, Crohn's disease, psoriasis, primary sclerosing cholangitis and ulcerative colitis, respectively, and log-additive disease risk.

#### **ImmunoChip-wide co-heritability analysis**

SNP-heritabilities and SNP-coheritabilities between the five immune-mediated diseases were estimated by fitting a bivariate linear mixed model<sup>31</sup> as implemented in the Genome-wide Complex Trait Analysis (GCTA) tool<sup>32</sup>. The genetic relationship between individuals was estimated using all SNPs passing quality control and excluding SNPs located within the MHC (chr6:2800000-33000000) and having  $MAF < 1\%$ . Variance components were estimated correcting for population structure by fitting the top seven principal components (PCs) as fixed effects. As the bivariate analysis requires disjoint control cohorts for each of the two

diseases, these were randomly allocated to two proportions of equal size (see **Supplementary Fig. 11**). The bivariate analysis gives a simultaneous estimate of the SNP-heritability to both diseases and an estimate of the SNP-genetic correlation (single disease SNP-heritability estimates were robust to the different control partitions **Supplementary Fig. 11**). Estimates of variance components in the observed scale, case-control risk scale, were transformed to the scale of liability as described previously<sup>32,33</sup>, for a range of assumed disease prevalence (0.0055, 0.0007, 0.012, 0.000039, 0.001 for ankylosing spondylitis, Crohn's disease, psoriasis, primary sclerosing cholangitis and ulcerative colitis, respectively).

### **Identification of drugs targeting genes within the core network**

The Drugbank ([www.drugbank.ca](http://www.drugbank.ca)) is the largest publicly available database containing 7737 drugs, their protein targets and the genes encoding these protein targets<sup>34</sup>. First genes that have been identified within the core network (**Supplementary Fig. 9**) were linked to drugs by using an R-script, which checks synonyms of gene names by using the R package “org.Hs.eg.db” and extracts the drugs that target the proteins encoded by the candidate genes. Since the nature and effect of the interaction between the drug and the encoded protein is mostly unknown (e.g some drugs we identified have effects opposite to the what we aim for) we performed a manual literature search to assess which of the identified drugs show evidence or could potentially be promising for any of the disease under study by using PubMed ([www.pubmed.gov](http://www.pubmed.gov), last search July 1st 2015) and ClinicalTrials.gov ([www.clinicaltrials.gov](http://www.clinicaltrials.gov)). All drugs were selected based on evidence from phase I/II/III randomized clinical trials (RCTs) or published animal studies. We grouped the registered drugs in three ways. 1) Known drugs for any of the diseases under study : a drug is already used or has been investigated showing evidence of effect in phase 2 or 3 randomized clinical trials in the treatment of AS, PSC, PS, CD or UC . 2) Efficacy in other immune mediated diseases then AS, PSC, PS, CD or UC: a drug was investigated or used for treatment in other immune mediated disorders. 3) No published clinical evidence for efficacy in immune mediated disease but the identified drug could potentially be suited for treating AS, PSC, PS, CD or UC.

### **Conjunctional False Discovery Rate analysis**

Conjunctional FDR: The FDR is the posterior probability of SNP association with the phenotype being null given that its *P*-value is as small or smaller than the observed one. Specifically, for a given *p*-value cutoff, the FDR is defined as

$$\text{FDR}(p) = \pi_0 F_0(p) / F(p), [1]$$

where  $\pi_0$  is the proportion of null SNPs,  $F_0$  is the null cdf, and  $F$  is the cdf of all SNPs, both null and non-null. Under the null hypothesis,  $F_0$  is the cdf of the uniform distribution on the unit interval  $[0,1]$ , so that Eq. [1] reduces to

$$\text{FDR}(p) = \pi_0 p / F(p), [2]$$

The cdf  $F$  can be estimated by the empirical cdf  $q = \pi_p / \pi$ , where  $\pi_p$  is the number of SNPs with  $p$ -values less than or equal to  $p$ , and  $\pi$  is the total number of SNPs. Replacing  $F$  by  $q$  in Eq. [2], we get

$$\text{Estimated FDR}(p) = \pi_0 p / q, [3]$$

which is biased upwards as an estimate of the FDR. Replacing  $\pi_0$  in Equation [3] with unity gives an estimated FDR that is further biased upward;

$$q^* = p/q [4]$$

If  $\pi_0$  is close to one, as is likely true for most GWAS, the increase in bias from Eq. [3] is minimal. The quantity  $1 - p/q$ , is therefore biased downward, and hence is a conservative estimate of the TDR.

Conditional FDR analysis (described in detail previously<sup>35,36</sup>) is defined as the posterior probability that a given SNP is null for the first phenotype given that the  $P$ -values for the other phenotype are as small as or smaller than the observed  $P$ -values. We assign a conditional FDR value for the first trait (Trait1) given the  $P$ -values of the second trait (Trait2) (denoted by  $\text{condFDR}_{\text{Trait1}|\text{Trait2}}$ ) to each SNP by computing conditional FDR estimates on a grid and interpolating these estimates into a two-dimensional look-up table. Vice versa, we assign a conditional FDR value for the second trait given the  $P$ -values of the first trait to each SNP (denoted by  $\text{condFDR}_{\text{Trait2}|\text{Trait1}}$ ).

To identify SNPs significantly associated with both phenotypes, we used a genetic epidemiology framework based on the conjunction false discovery rate ( $\text{conjFDR}$ ). We assigned the  $\text{conjFDR}$  values by interpolation into a bi-directional two-dimensional look-up table.  $\text{ConjFDR}$ , is defined as the posterior probability that a SNP is null for either phenotype or both simultaneously, given the  $P$ -values for both traits are as small or smaller than the observed  $P$ -value. A conservative estimate of the conjunction FDR is given by the maximum



statistic, i.e. the maximum of  $FDR_{\text{Trait1}|\text{Trait2}}$  and  $FDR_{\text{Trait2}|\text{Trait1}}$ . While the condFDR can be used to reorder association of SNPs to one trait based on the additional information provided by the co-morbid secondary traits, the conjFDR pinpoints pleiotropic loci, since a low conjFDR is only possible if there is an association with the two traits of interest jointly.

Conjunctional analysis between pairs of diseases: We randomly divided the controls into each disease in a pair 10 times, proportionally to the number of cases for the disease in the pair. The program PLINK<sup>37</sup> was used to compute the *P-values* for associations of SNPs with each disease in each iteration, including the first 10 principal components and ethnicity as covariates. We, then, computed the bi-directional look-up table of the conjFDR for each pair of diseases and for each iteration. The averaged look-up table across 10 iterations was used to assign conjFDR to each SNP. SNPs in the extended MHC region (chr6: 25652429–33368333) were removed before analysis for all pairs.

Annotation SNPs to Genes: SNPs having  $\text{conjFDR} \leq 0.05$  were considered as signals of association with both diseases (pleiotropic with two diseases). We defined the genomic loci tagged by the identified SNPs by using LD  $r^2 \leq 0.1$  (two SNPs having LD  $r^2 > 0.1$  are considered as within one loci) and by distance 1Mb (two consecutive loci with genomic distance closer than 1Mb, were merged in one). The SNP with the lowest conjFDR value in each locus was taken as the leading SNP of the locus. Genes closest to or in the each locus were identified by the online Ensembl variant effect predictor tool based on the GRCH37 build.

Pleiotropy between pair of diseases: Since the power of the conjunctional FDR method depends on the sample sizes and the similarity of genetic architecture (mainly, polygenicity) of both diseases in a pair. We didn't find pleiotropic signals outside of the MHC region between other pairs of diseases except for CD and UC. We identified 111 independent loci pleiotropic to the CD and UC with  $\text{conjFDR} \leq 0.05$ , which include 179 unique genes (**Supplementary Table 17**). Among the 111 independent loci, 44 overlap with the loci identified by the primary subset-based meta-analysis. There are 29 loci above the estimated expected FDR (0.025) using the recently described method<sup>14</sup> of which 6 overlaps with the loci identified by the primary subset-based meta-analysis.

## Members of the International Inflammatory Bowel Disease Genetics Consortium (IBDGC)

Clara Abraham<sup>34</sup>, Jean-Paul Achkar<sup>35,36</sup>, Tariq Ahmad<sup>37</sup>, Leila Amininejad<sup>38,39</sup>, Ashwin N Ananthakrishnan<sup>28,40</sup>, Vibeke Andersen<sup>9,10</sup>, Carl A Anderson<sup>7</sup>, Jane M Andrews<sup>41</sup>, Vito Annese<sup>42,43</sup>, Guy Aumais<sup>32,44</sup>, Leonard Baidoo<sup>29</sup>, Robert N Baldassano<sup>45</sup>, Peter A Bampton<sup>46</sup>, Murray Barclay<sup>47</sup>, Jeffrey C Barrett<sup>7</sup>, Theodore M Bayless<sup>48</sup>, Johannes Bethge<sup>49</sup>, Alain Bitton<sup>50</sup>, Gabrielle Boucher<sup>8</sup>, Stephan Brand<sup>51</sup>, Berenice Brandt<sup>49</sup>, Steven R Brant<sup>48</sup>, Carsten Büning<sup>52</sup>, Angela Chew<sup>19,53</sup>, Judy H Cho<sup>33</sup>, Isabelle Cleynen<sup>11</sup>, Ariella Cohain<sup>54</sup>, Anthony Croft<sup>55</sup>, Mark J Daly<sup>1,2</sup>, Mauro D'Amato<sup>12,13</sup>, Silvio Danese<sup>56</sup>, Dirk De Jong<sup>57</sup>, Martine De Vos<sup>58</sup>, Goda Denapiene<sup>59</sup>, Lee A Denson<sup>60</sup>, Kathy L Devaney<sup>28</sup>, Olivier Dewit<sup>61</sup>, Renata D'Inca<sup>62</sup>, Marla Dubinsky<sup>63</sup>, Richard H Duerr<sup>29,30</sup>, Cathryn Edwards<sup>64</sup>, David Ellinghaus<sup>15</sup>, Jonah Essers<sup>65,66</sup>, Lynnette R Ferguson<sup>67</sup>, Eleonora A Festen<sup>26</sup>, Philip Fleshner<sup>17</sup>, Tim Florin<sup>68</sup>, Denis Franchimont<sup>38,39</sup>, Andre Franke<sup>15</sup>, Karin Fransen<sup>69</sup>, Richard Gearry<sup>47,70</sup>, Michel Georges<sup>3,4</sup>, Christian Gieger<sup>71</sup>, Jürgen Glas<sup>51,72</sup>, Philippe Goyette<sup>8</sup>, Todd Green<sup>2,65</sup>, Anne M Griffiths<sup>73</sup>, Stephen L Guthery<sup>74</sup>, Hakon Hakonarson<sup>45</sup>, Jonas Halfvarson<sup>16</sup>, Katherine Hanigan<sup>55</sup>, Talin Haritunians<sup>17</sup>, Ailsa Hart<sup>75</sup>, Chris Hawkey<sup>76</sup>, Nicholas K Hayward<sup>77</sup>, Matija Hedl<sup>34</sup>, Paul Henderson<sup>78,79</sup>, Xinli Hu<sup>80</sup>, Hailiang Huang<sup>1,2</sup>, Ken Y Hui<sup>33</sup>, Marcin Imielinski<sup>45</sup>, Andrew Ippoliti<sup>17</sup>, Laimas Jonaitis<sup>81</sup>, Luke Jostins<sup>5,6</sup>, Tom H Karlsen<sup>82,83,84</sup>, Nicholas A Kennedy<sup>20</sup>, Mohammed Azam Khan<sup>85,86</sup>, Gediminas Kiudelis<sup>81</sup>, Krupa Krishnaprasad<sup>87</sup>, Subra Kugathasan<sup>88</sup>, Limas Kupcinskis<sup>89</sup>, Anna Latiano<sup>42</sup>, Debby Laukens<sup>58</sup>, Ian C Lawrance<sup>90,91</sup>, James C Lee<sup>23</sup>, Charlie W Lees<sup>20</sup>, Marcis Leja<sup>92</sup>, Johan Van Limbergen<sup>73</sup>, Paolo Lionetti<sup>93</sup>, Jimmy Z Liu<sup>7</sup>, Edouard Louis<sup>21</sup>, Gillian Mahy<sup>94</sup>, John Mansfield<sup>95</sup>, Dunecan Massey<sup>23</sup>, Christopher G Mathew<sup>24,31</sup>, Dermot PB McGovern<sup>17</sup>, Raquel Milgrom<sup>96</sup>, Mitja Mitrovic<sup>69,97</sup>, Grant W Montgomery<sup>77</sup>, Craig Mowat<sup>98</sup>, William Newman<sup>85,86</sup>, Aylwin Ng<sup>28,99</sup>, Siew C Ng<sup>100</sup>, Sok Meng Evelyn Ng<sup>34</sup>, Susanna Nikolaus<sup>49</sup>, Kaida Ning<sup>34</sup>, Markus Nöthen<sup>101</sup>, Ioannis Oikonomou<sup>34</sup>, Orazio Palmieri<sup>42</sup>, Miles Parkes<sup>23</sup>, Anne Phillips<sup>98</sup>, Cyriel Y Ponsioen<sup>102</sup>, Urõs Potocnik<sup>97,103</sup>, Natalie J Prescott<sup>24,31</sup>, Deborah D Proctor<sup>34</sup>, Graham Radford-Smith<sup>55,104</sup>, Jean-Francois Rahier<sup>105</sup>, Soumya Raychaudhuri<sup>80</sup>, Miguel Regueiro<sup>29</sup>, Florian Rieder<sup>35</sup>, John D Rioux<sup>8,32</sup>, Stephan Ripke<sup>1,2</sup>, Rebecca Roberts<sup>47</sup>, Richard K Russell<sup>78</sup>, Jeremy D Sanderson<sup>106</sup>, Miquel Sans<sup>107</sup>, Jack Satsangi<sup>20</sup>, Eric E Schadt<sup>54</sup>, Stefan Schreiber<sup>15,49</sup>, Dominik Schulte<sup>49</sup>, L Philip Schumm<sup>108</sup>, Regan Scott<sup>29</sup>, Mark Seielstad<sup>109,110</sup>, Yashoda Sharma<sup>34</sup>, Mark S Silverberg<sup>96</sup>, Lisa A Simms<sup>55</sup>, Jurgita Skieceviciene<sup>81</sup>, Sarah L Spain<sup>24,25</sup>, A. Hillary Steinhart<sup>96</sup>, Joanne M Stempak<sup>96</sup>, Laura Stronati<sup>111</sup>, Jurgita Sventoraityte<sup>89</sup>, Stephan R Targan<sup>17</sup>, Kirstin M Taylor<sup>106</sup>, Anje ter Velde<sup>102</sup>, Emilie Theatre<sup>3,4</sup>, Leif Torkvist<sup>112</sup>, Mark Tremelling<sup>113</sup>, Andrea van der Meulen<sup>114</sup>, Suzanne van Sommeren<sup>26</sup>, Eric Vasiliauskas<sup>17</sup>, Severine Vermeire<sup>11,27</sup>, Hein W Verspaget<sup>114</sup>, Thomas Walters<sup>73,115</sup>, Kai Wang<sup>45</sup>, Ming-Hsi Wang<sup>35,48</sup>, Rinse K Weersma<sup>26</sup>, Zhi Wei<sup>116</sup>, David Whiteman<sup>77</sup>, Cisca Wijmenga<sup>69</sup>, David C Wilson<sup>78,79</sup>, Juliane Winkelmann<sup>117,118</sup>, Ramnik J Xavier<sup>2,28</sup>, Bin Zhang<sup>54</sup>, Clarence K Zhang<sup>119</sup>, Hu Zhang<sup>120,121</sup>, Wei Zhang<sup>34</sup>, Hongyu Zhao<sup>119</sup>, Zhen Z Zhao<sup>77</sup>

<sup>1</sup>Analytic and Translational Genetics Unit, Massachusetts General Hospital, Harvard Medical School, Boston, Massachusetts, USA. <sup>2</sup>Broad Institute of MIT and Harvard, Cambridge, Massachusetts, USA. <sup>3</sup>Unit of Animal Genomics, Groupe Interdisciplinaire de Génoprotéomique Appliquée (GIGA-R) Research Center, University of Liège, Liège, Belgium. <sup>4</sup>Faculty of Veterinary Medicine, University of Liège, Liège, Belgium. <sup>5</sup>Wellcome Trust Centre for Human Genetics, University of Oxford, Headington, UK. <sup>6</sup>Christ Church, University of Oxford, St Aldates, UK. <sup>7</sup>Wellcome Trust Sanger Institute, Hinxton (Cambridge), UK. <sup>8</sup>Research Center, Montreal Heart Institute, Montréal, Québec, Canada. <sup>9</sup>Medical Department, Viborg Regional Hospital, Viborg, Denmark. <sup>10</sup>Organ Center, Hospital of Southern Jutland Aabenraa, Aabenraa, Denmark. <sup>11</sup>Department of Clinical and experimental medicine, Translational Research in GastroIntestinal Disorders (TARGID), Katholieke Universiteit (KU) Leuven, Leuven, Belgium. <sup>12</sup>Department of Biosciences and Nutrition, Karolinska Institutet,

Stockholm, Sweden. <sup>13</sup>BioCruces Health Research Institute and IKERBASQUE, Basque Foundation for Science, Bilbao, Spain. <sup>14</sup>llumina, San Diego, California, USA. <sup>15</sup>Institute of Clinical Molecular Biology, Christian-Albrechts-University of Kiel, Kiel, Germany. <sup>16</sup>Department of Gastroenterology, Faculty of Medicine and Health, Örebro University, Örebro, Sweden. <sup>17</sup>F. Widjaja Foundation Inflammatory Bowel and Immunobiology Research Institute, Cedars-Sinai Medical Center, Los Angeles, California, USA. <sup>18</sup>Department of psychiatry, University of Toronto, Toronto, Ontario, Canada. <sup>19</sup>School of Medicine and Pharmacology, University of Western Australia, Fremantle, Australia. <sup>20</sup>Gastrointestinal Unit, Wester General Hospital University of Edinburgh, Edinburgh, UK. <sup>21</sup>Division of Gastroenterology, Centre Hospitalier Universitaire (CHU) de Liège, Liège, Belgium. <sup>22</sup>Laboratory for Genotyping Development, Center for Integrative Medical Sciences, RIKEN, Yokohama, Japan. <sup>23</sup>Inflammatory Bowel Disease Research Group, Addenbrooke's Hospital, Cambridge, UK. <sup>24</sup>Department of Medical and Molecular Genetics, King's College London School of Medicine, Guy's Hospital, London, UK. <sup>25</sup>Centre for Therapeutic Target Validation, Wellcome Trust Genome Campus, Hinxton (Cambridge), UK. <sup>26</sup>Department of Gastroenterology and Hepatology, University Medical Center Groningen, Groningen, The Netherlands. <sup>27</sup>Division of Gastroenterology, University Hospital Gasthuisberg, Leuven, Belgium. <sup>28</sup>Gastroenterology Unit, Massachusetts General Hospital, Harvard Medical School, Boston, Massachusetts, USA. <sup>29</sup>Division of Gastroenterology, Hepatology and Nutrition, Department of Medicine, University of Pittsburgh School of Medicine, Pittsburgh, Pennsylvania, USA. <sup>30</sup>Department of Human Genetics, University of Pittsburgh Graduate School of Public Health, Pittsburgh, Pennsylvania, USA. <sup>31</sup>Department of Medical and Molecular Genetics, Guy's Hospital, London, UK. <sup>32</sup>Faculté de Médecine, Université de Montréal, Montréal, Québec, Canada. <sup>33</sup>Department of Genetics, Yale School of Medicine, New Haven, Connecticut, USA. <sup>34</sup>Section of Digestive Diseases, Department of Internal Medicine, Yale School of Medicine, New Haven, Connecticut, USA. <sup>35</sup>Department of Gastroenterology and Hepatology, Digestive Disease Institute, Cleveland Clinic, Cleveland, Ohio, USA. <sup>36</sup>Department of Pathobiology, Lerner Research Institute, Cleveland Clinic, Cleveland, Ohio, USA. <sup>37</sup>Peninsula College of Medicine and Dentistry, Exeter, UK. <sup>38</sup>Department of Gastroenterology, Erasmus Hospital, Brussels, Belgium. <sup>39</sup>Department of Gastroenterology, Free University of Brussels, Brussels, Belgium. <sup>40</sup>Division of Medical Sciences, Harvard Medical School, Boston, Massachusetts, USA. <sup>41</sup>Inflammatory Bowel Disease Service, Department of Gastroenterology and Hepatology, Royal Adelaide Hospital, Adelaide, Australia. <sup>42</sup>Unit of Gastroenterology, Istituto di Ricovero e Cura a Carattere Scientifico-Casa Sollievo della Sofferenza (IRCCS-CSS) Hospital, San Giovanni Rotondo, Italy. <sup>43</sup>Strutture Organizzative Dipartimentali (SOD) Gastroenterologia 2, Azienda Ospedaliero Universitaria (AOU) Careggi, Florence, Italy. <sup>44</sup>Department of Gastroenterology, Hôpital Maisonneuve-Rosemont, Montréal, Québec, Canada. <sup>45</sup>Center for Applied Genomics, The Children's Hospital of Philadelphia, Philadelphia, Pennsylvania, USA. <sup>46</sup>Department of Gastroenterology and Hepatology, Flinders Medical Centre and School of Medicine, Flinders University, Adelaide, Australia. <sup>47</sup>Department of Medicine, University of Otago, Christchurch, New Zealand. <sup>48</sup>Meyerhoff Inflammatory Bowel Disease Center, Department of medicine, Johns Hopkins University School of Medicine, Baltimore, Maryland, USA. <sup>49</sup>Department for General Internal Medicine, Christian-Albrechts-University, Kiel, Germany. <sup>50</sup>Division of Gastroenterology, Royal Victoria Hospital, Montréal, Québec, Canada. <sup>51</sup>Department of Medicine II, Ludwig-Maximilians-University Hospital Munich-Grosshadern, Munich, Germany. <sup>52</sup>Department of Gastroenterology, Campus Charité Mitte, Universitätsmedizin Berlin, Berlin, Germany. <sup>53</sup>IBD unit, Fremantle Hospital, Fremantle, Australia. <sup>54</sup>Department of Genetics and Genomic Sciences, Mount Sinai School of Medicine, New York, New York, USA. <sup>55</sup>Inflammatory Bowel Diseases, Genetics and Computational Biology, Queensland Institute of Medical Research, Brisbane, Australia. <sup>56</sup>IBD Center, Department of Gastroenterology, Istituto Clinico Humanitas, Milan, Italy. <sup>57</sup>Department of Gastroenterology and Hepatology, Radboud University Nijmegen Medical Centre, Nijmegen, The Netherlands. <sup>58</sup>Department of Hepatology and Gastroenterology, Ghent University Hospital, Ghent, Belgium. <sup>59</sup>Center of hepatology, Gastroenterology and Dietetics, Vilnius University, Vilnius, Lithuania. <sup>60</sup>Pediatric Gastroenterology, Cincinnati Children's Hospital Medical Center, Cincinnati, Ohio, USA. <sup>61</sup>Department of Gastroenterology, Université Catholique de Louvain (UCL) Cliniques Universitaires Saint-Luc, Brussels, Belgium. <sup>62</sup>Division of Gastroenterology, University Hospital Padua, Padua, Italy. <sup>63</sup>Department of Pediatrics, Cedars Sinai Medical Center, Los Angeles, California, USA. <sup>64</sup>Department of Gastroenterology, Torbay Hospital, Torbay, Devon, UK. <sup>65</sup>Center for Human Genetic Research, Massachusetts General Hospital, Harvard Medical School, Boston, Massachusetts, USA. <sup>66</sup>Pediatrics, Harvard Medical School, Boston, Massachusetts, USA. <sup>67</sup>Faculty of Medical & Health Sciences, School of

Medical Sciences, The University of Auckland, Auckland, New Zealand. <sup>68</sup>Department of Gastroenterology, Mater Health Services, Brisbane, Australia. <sup>69</sup>Department of Genetics, University Medical Center Groningen, Groningen, The Netherlands. <sup>70</sup>Department of Gastroenterology, Christchurch Hospital, Christchurch, New Zealand. <sup>71</sup>Institute of Genetic Epidemiology, Helmholtz Zentrum München - German Research Center for Environmental Health, Neuherberg, Germany. <sup>72</sup>Department of Preventive Dentistry and Periodontology, Ludwig-Maximilians-University Hospital Munich-Grosshadern, Munich, Germany. <sup>73</sup>Division of Pediatric Gastroenterology, Hepatology and Nutrition, Hospital for Sick Children, Toronto, Ontario, Canada. <sup>74</sup>Department of Pediatrics, University of Utah School of Medicine, Salt Lake City, Utah, USA. <sup>75</sup>Department of Medicine, St Mark's Hospital, Harrow, Middlesex, UK. <sup>76</sup>Nottingham Digestive Diseases Centre, Queens Medical Centre, Nottingham, UK. <sup>77</sup>Molecular Epidemiology, Genetics and Computational Biology, Queensland Institute of Medical Research, Brisbane, Australia. <sup>78</sup>Paediatric Gastroenterology and Nutrition, Royal Hospital for Sick Children, Edinburgh, UK. <sup>79</sup>Child Life and Health, University of Edinburgh, Edinburgh, Scotland, UK. <sup>80</sup>Division of Rheumatology Immunology and Allergy, Brigham and Women's Hospital, Boston, Massachusetts, USA. <sup>81</sup>Academy of Medicine, Lithuanian University of Health Sciences, Kaunas, Lithuania. <sup>82</sup>Research Institute of Internal Medicine, Department of Transplantation Medicine, Division of Cancer, Surgery and Transplantation, Oslo University Hospital Rikshospitalet, Oslo, Norway. <sup>83</sup>Norwegian PSC Research Center, Department of Transplantation Medicine, Division of Cancer, Surgery and Transplantation, Oslo University Hospital Rikshospitalet, Oslo, Norway. <sup>84</sup>K.G. Jebsen Inflammation Research Centre, Institute of Clinical Medicine, University of Oslo, Oslo, Norway. <sup>85</sup>Genetic Medicine, Manchester Academic Health Science Centre, Manchester, UK. <sup>86</sup>The Manchester Centre for Genomic Medicine, University of Manchester, Manchester, UK. <sup>87</sup>QIMR Berghofer Medical Research Institute, Royal Brisbane Hospital, Brisbane, Australia. <sup>88</sup>Department of Pediatrics, Emory University School of Medicine, Atlanta, Georgia, USA. <sup>89</sup>Department of Gastroenterology, Kaunas University of Medicine, Kaunas, Lithuania. <sup>90</sup>Centre for inflammatory Bowel Diseases, Saint John of God Hospital, Subiaco, Australia. <sup>91</sup>School of Medicine and Pharmacology, University of Western Australia, Harry Perkins Institute for Medical Research, Murdoch, Australia. <sup>92</sup>Faculty of medicine, University of Latvia, Riga, Latvia. <sup>93</sup>Dipartimento di Neuroscienze, Psicologia, Area del Farmaco e Salute del Bambino (NEUROFARBA), Università di Firenze Strutture Organizzative Dipartimentali (SOD) Gastroenterologia e Nutrizione Ospedale pediatrico Meyer, Firenze, Italy. <sup>94</sup>Department of Gastroenterology, The Townsville Hospital, Townsville, Australia. <sup>95</sup>Institute of Human Genetics, Newcastle University, Newcastle upon Tyne, UK. <sup>96</sup>Inflammatory Bowel Disease Centre, Mount Sinai Hospital, Toronto, Ontario, Canada. <sup>97</sup>Center for Human Molecular Genetics and Pharmacogenomics, Faculty of Medicine, University of Maribor, Maribor, Slovenia. <sup>98</sup>Department of Medicine, Ninewells Hospital and Medical School, Dundee, UK. <sup>99</sup>Center for Computational and Integrative Biology, Massachusetts General Hospital, Harvard Medical School, Boston, Massachusetts, USA. <sup>100</sup>Department of Medicine and Therapeutics, Institute of Digestive Disease, Chinese University of Hong Kong, Hong Kong. <sup>101</sup>Department of Genomics Life & Brain Center, University Hospital Bonn, Bonn, Germany. <sup>102</sup>Department of Gastroenterology, Academic Medical Center, Amsterdam, The Netherlands. <sup>103</sup>Faculty for Chemistry and Chemical Engineering, University of Maribor, Maribor, Slovenia. <sup>104</sup>Department of Gastroenterology, Royal Brisbane and Womens Hospital, Brisbane, Australia. <sup>105</sup>Department of Gastroenterology, Université Catholique de Louvain (UCL) Centre Hospitalier Universitaire (CHU) Mont-Godinne, Mont-Godinne, Belgium. <sup>106</sup>Department of Gastroenterology, Guy's & St Thomas' NHS Foundation Trust, St-Thomas Hospital, London, UK. <sup>107</sup>Department of Digestive Diseases, Hospital Quiron Teknon, Barcelona, Spain. <sup>108</sup>Department of Public Health Sciences, University of Chicago, Chicago, Illinois, USA. <sup>109</sup>Human Genetics, Genome Institute of Singapore, Singapore. <sup>110</sup>Institute for Human Genetics, University of California, San Francisco, San Francisco, California, USA. <sup>111</sup>Department of Biology of Radiations and Human Health, Agenzia nazionale per le nuove tecnologie l'energia e lo sviluppo economico sostenibile (ENEA), Rome, Italy. <sup>112</sup>Department of Clinical Science Intervention and Technology, Karolinska Institutet, Stockholm, Sweden. <sup>113</sup>Gastroenterology & General Medicine, Norfolk and Norwich University Hospital, Norwich, UK. <sup>114</sup>Department of Gastroenterology, Leiden University Medical Center, Leiden, The Netherlands. <sup>115</sup>Faculty of medicine, University of Toronto, Toronto, Ontario, Canada. <sup>116</sup>Department of Computer Science, New Jersey Institute of Technology, Newark, New Jersey, USA. <sup>117</sup>Institute of Human Genetics, Technische Universität München, Munich, Germany. <sup>118</sup>Department of Neurology, Technische Universität München, Munich, Germany. <sup>119</sup>Department of Biostatistics, School of Public Health, Yale

University, New Haven, Connecticut, USA. <sup>120</sup>Department of Gastroenterology, West China Hospital, Chengdu, Sichuan, China. <sup>121</sup>State Key Laboratory of Biotherapy, Sichuan University West China University of Medical Sciences (WCUMS), Chengdu, Sichuan, China

## **Members of the International Genetics of Ankylosing Spondylitis Consortium (IGAS)**

Adrian Cortes<sup>1</sup>, Johanna Hadler<sup>1</sup>, Jenny P Pointon<sup>2</sup>, Philip C Robinson<sup>1</sup>, Tugce Karaderi<sup>2</sup>, Paul Leo<sup>1</sup>, Katie Cremin<sup>1</sup>, Karena Pryce<sup>1</sup>, Jessica Harris<sup>1</sup>, Seunghun Lee<sup>3</sup>, Kyung Bin Joo<sup>3</sup>, Seung-Cheol Shim<sup>4</sup>, Michael Weisman<sup>5</sup>, Michael Ward<sup>6</sup>, Xiaodong Zhou<sup>7</sup>, Henri-Jean Garchon<sup>8,9</sup>, Gilles Chiochia<sup>8</sup>, Johannes Nossent<sup>10,11</sup>, Benedicte A Lie<sup>12,13</sup>, Øystein Førre<sup>14</sup>, Jaakko Tuomilehto<sup>15–17</sup>, Kari Laiho<sup>18</sup>, Lei Jiang<sup>19</sup>, Yu Liu<sup>19</sup>, Xin Wu<sup>19</sup>, Linda A Bradbury<sup>1</sup>, Zhixiu Li<sup>1</sup>, Dirk Elewaut<sup>20</sup>, Ruben Burgos-Vargas<sup>21</sup>, Simon Stebbings<sup>22</sup>, Louise Appleton<sup>2</sup>, Claire Farrah<sup>2</sup>, Jonathan Lau<sup>2</sup>, Tony J Kenna<sup>1</sup>, Nigil Haroon<sup>23</sup>, Manuel A Ferreira<sup>24</sup>, Jian Yang<sup>1</sup>, Juan Mulero<sup>25</sup>, Jose Luis Fernandez-Sueiro<sup>26</sup>, Miguel A Gonzalez-Gay<sup>27</sup>, Carlos Lopez-Larrea<sup>28,29</sup>, Panos Deloukas<sup>30</sup>, Peter Donnelly<sup>31</sup>, **Australo-Anglo-American Spondyloarthritis Consortium (TASC), Groupe Française d'Etude Génétique des Spondylarthrites (GFEGS), Nord-røndelag Health Study (HUNT), Spondyloarthritis Research Consortium of Canada (SPARCC)**, Paul Bowness<sup>2</sup>, Karl Gafney<sup>33</sup>, Hill Gaston<sup>34</sup>, Dafna D Gladman<sup>35–37</sup>, Proton Rahman<sup>38</sup>, Walter P Maksymowych<sup>39</sup>, Huji Xu<sup>19</sup>, J Bart A Crusius<sup>40</sup>, Irene E van der Horst-Bruinsma<sup>41</sup>, Chung-Tei Chou<sup>42,43</sup>, Raphael Valle-Oñate<sup>44</sup>, Consuelo Romero-Sánchez<sup>44</sup>, Inger Myrnes Hansen<sup>45</sup>, Fernando M Pimentel-Santos<sup>46</sup>, Robert D Inman<sup>23</sup>, Vibeke Videm<sup>47,48</sup>, Javier Martin<sup>49</sup>, Maxime Breban<sup>8,9</sup>, John D Reveille<sup>7</sup>, David M Evans<sup>1,50,51</sup>, Tae-Hwan Kim<sup>3</sup>, Bryan Paul Wordsworth<sup>2</sup> & Matthew A Brown<sup>1</sup>.

<sup>1</sup>University of Queensland Diamantina Institute, Translational Research Institute, Brisbane, Queensland, Australia. <sup>2</sup>National Institute for Health Research (NIHR) Oxford Musculoskeletal Biomedical Research Unit, Nuffield Orthopaedic Centre, Headington, Oxford, UK. <sup>3</sup>Department of Rheumatology, Hanyang University Hospital for Rheumatic Diseases, Seoul, Republic of Korea. <sup>4</sup>Department of Medicine, Division of Rheumatology, Eulji University Hospital, Daejeon, Republic of Korea. <sup>5</sup>Department of Medicine/Rheumatology, Cedars-Sinai Medical Center, Los Angeles, California, USA. <sup>6</sup>National Institute of Arthritis and Musculoskeletal and Skin Diseases, US National Institutes of Health, Bethesda, Maryland, USA. <sup>7</sup>Rheumatology and Clinical Immunogenetics, University of Texas Health Science Center at Houston, Houston, Texas, USA. <sup>8</sup>Institut Cochin, Université Paris–Descartes, Centre National de Recherche Scientifique (CNRS) Unite Mixte de Recherche (UMR) 8104, Institut National de la Santé et de la Recherche Médicale (INSERM) U1016, Paris, France. <sup>9</sup>Division of Rheumatology, Ambroise Pare Hospital, Assistance Publique–Hôpital de Paris, Versailles-Saint-Quentin en Yvelines University, Boulogne-Billancourt, France. <sup>10</sup>University Hospital North Norway, Tromsø, Norway. <sup>11</sup>Division of Medicine, Royal Darwin Hospital, Darwin, Northern Territory, Australia. <sup>12</sup>Department of Medical Genetics, University of Oslo and Oslo University Hospital, Oslo, Norway. <sup>13</sup>Department of Immunology, Oslo University Hospital, Oslo, Norway. <sup>14</sup>Department of Rheumatology, University Hospital Oslo, Oslo, Norway. <sup>15</sup>Centre for Vascular Prevention, Danube-University Krems, Krems, Austria. <sup>16</sup>Diabetes Prevention Unit, National Institute for Health and Welfare, Helsinki, Finland. <sup>17</sup>King Abdulaziz University, Jeddah, Saudi Arabia. <sup>18</sup>Paijat-Hame Central Hospital, Lahti, Finland. <sup>19</sup>Department of Rheumatology and Immunology, Shanghai Changzheng Hospital, Second Military Medical University, Shanghai, China. <sup>20</sup>VIB Inflammation Research Center, Ghent University, Ghent, Belgium and Department of Rheumatology, Ghent University Hospital, Ghent, Belgium. <sup>21</sup>Department of Rheumatology, Hospital General de Mexico, Faculty of Medicine, Universidad Nacional Autónoma de México, Mexico City, Mexico. <sup>22</sup>Department of Medicine, Dunedin School of Medicine, University of Otago, Dunedin, New Zealand. <sup>23</sup>Division of Rheumatology, Toronto Western Hospital, Toronto, Ontario, Canada. <sup>24</sup>Queensland Institute of Medical Research, Royal Brisbane Hospital, Herston, Queensland, Australia. <sup>25</sup>Rheumatology Department,

Hospital Puerta de Hierro, Madrid, Spain. 26Rheumatology Department, Complejo Hospitalario La Coruna, Instituto de Investigacion Biomedica A Coruna (INIBIC), La Coruna, Spain. 27Rheumatology Department, Hospital Marques de Valceçilla, Instituto de Formacion e Investigacion Marques de Valceçillas (IFIMAV), Santander, Spain. 28Department of Immunology, Asturias Central University Hospital, Oviedo, Spain. 29Fundación Renal “Iñigo Alvarez de Toledo”, Madrid, Spain. 30Wellcome Trust Sanger Institute, Cambridge, UK. 31Wellcome Trust Centre for Human Genetics, University of Oxford, Oxford, UK. 33Department of Rheumatology, Norfolk and Norwich University Hospital, Norwich, UK. 34Department of Medicine, University of Cambridge, Addenbrooke’s Hospital, Cambridge, UK. 35Division of Rheumatology, University of Toronto, Toronto, Ontario, Canada. 36Toronto Western Research Institute, Toronto, Ontario, Canada. 37Psoriatic Arthritis Program, University Health Network, Toronto, Ontario, Canada. 38Memorial University of Newfoundland, St. John’s, Newfoundland, Canada. 39Department of Medicine, University of Alberta, Edmonton, Alberta, Canada. 40Laboratory of Immunogenetics, Department of Medical Microbiology and Infection Control, VU University Medical Center, Amsterdam, The Netherlands. 41Department of Rheumatology, VU University Medical Center, Amsterdam, The Netherlands. 42Department of Medicine, Division of Allergy, Immunology, Rheumatology, Taipei Veterans General Hospital, Taipei, Taiwan. 43School of Medicine, National Yang-Ming University, Taipei, Taiwan. 44Spondyloarthropathies Group, Hospital Militar – School of Medicine, Universidad *Militar* Nueva Granada, Bogota, Colombia. 45Helgelandssykehuset, Mo i Rana, Norway. 46Chronic Diseases Research Centre (CEDOC), Faculdade de Ciências Médicas, Universidade Nova de Lisboa, Lisbon, Portugal. 47Department of Laboratory Medicine, Children’s and Women’s Health, Norwegian University of Science and Technology, Trondheim, Norway. 48Department of Immunology and Transfusion Medicine, Trondheim University Hospital, Trondheim, Norway. 49Instituto de Parasitología y Biomedicina Lopez-Neyra, Consejo Superior de Investigaciones Científicas, Granada, Spain. 50Medical Research Council (MRC) Integrative Epidemiology Unit, University of Bristol, UK. 51School of Social and Community Medicine, University of Bristol, Bristol, UK.

### **Membership of Australo-Anglo-American Spondyloarthritis Consortium (TASC)**

John D. Reveille<sup>1</sup>, Bryan Paul Wordsworth<sup>2</sup>, Matthew A. Brown<sup>3,4</sup>, Adrian Cortes<sup>3</sup>, Paul Leo<sup>3</sup>, Tony J. Kenna<sup>3</sup>, Johanna Hadler<sup>3</sup>, Katie Cremin<sup>3</sup>, Karena Pryce<sup>3</sup>, Jessica Harris<sup>3,4</sup>, Jenny P. Pointon<sup>2</sup>, Tugce Karaderi<sup>2</sup>, Michael H Weisman<sup>5</sup>, Michael Ward<sup>6</sup>, Linda A. Bradbury<sup>3,4</sup>, Robert D. Inman<sup>7</sup>

<sup>1</sup> Rheumatology and Clinical Immunogenetics, University of Texas Health Science Center at Houston, Houston, Texas, USA; <sup>2</sup> National Institute for Health Research (NIHR) Oxford Musculoskeletal Biomedical Research Unit, Nuffield Orthopaedic Centre, Headington, Oxford, United Kingdom; <sup>3</sup> University of Queensland Diamantina Institute, Translational Research Institute, Brisbane, Australia; <sup>4</sup> Institute of Health & Biomedical Innovation (IHBI), Faculty of Health, Queensland University of Technology (QUT), Translational Research Institute, Brisbane, Queensland, Australia. <sup>5</sup> Department of Medicine/Rheumatology, Cedars---Sinai Medical Center, Los Angeles, California, USA; <sup>6</sup> National Institute of Arthritis and Musculoskeletal and Skin Diseases, National Institutes of Health, Bethesda, Maryland, USA; <sup>7</sup> Division of Rheumatology, Toronto Western Hospital, Toronto, Canada.

### **Membership of Groupe Francaise d’Etude Genetique des Spondylarthrites (GFEGS)**

Maxime Breban<sup>1,2</sup>, Gilles Chioçchia<sup>1,2</sup>, Henri-Jean Garchon<sup>1,2</sup>, Roula Said-Nahal<sup>2</sup>, Felicie Costantino<sup>2</sup>, Ariane Leboime<sup>2</sup>

<sup>1</sup> INSERM U1173, Faculty of Health Sciences Simone Veil, Versailles-St-Quentin University, Montigny-le-Bretonneux, France; <sup>2</sup> Rheumatology Division, Ambroise Pare Hospital, Assistance Publique-Hopitaux de Paris, Boulogne-Billancourt, France.

## **Membership of Nord-Trøndelag health study (HUNT)**

Vibeke Videm<sup>1,2</sup>

1 Department of Laboratory Medicine, Children's and Women's Health, Norwegian University of Science and Technology, Trondheim, Norway; 2 Department of Immunology and Transfusion Medicine, Trondheim University Hospital, Norway.

## **Membership of Spondyloarthritis Research Consortium of Canada (SPARCC)**

Dafna Gladman<sup>1,2,3</sup>, Nigil Haroon<sup>4</sup>, Robert Inman<sup>4</sup>, Walter Maksymowych<sup>5</sup>, and Proton Rahman<sup>6</sup>.

1 Division of Rheumatology, University of Toronto, Toronto, Canada; 2 Toronto Western Research Institute, Toronto, Canada; 3 Psoriatic Arthritis Program, University Health Network; 4 Division of Rheumatology, Toronto Western Hospital, Toronto, Canada; 5 Department of Medicine, University of Alberta, Canada; 6 Memorial University of Newfoundland, Newfoundland, Canada.

## **Members of International PSC Study Group (IPSCSG)**

Jimmy Z. Liu<sup>1</sup>, Johannes Roksdund Hov<sup>2,3,4,5</sup>, Simon M. Rushbrook<sup>6</sup>, Tobias J. Weismüller<sup>7,8</sup>, Bertus Eksteen<sup>9</sup>, Pietro Invernizzi<sup>10</sup>, Gideon M. Hirschfield<sup>11,12</sup>, Daniel Nils Gotthardt<sup>13</sup>, Albert Pares<sup>14</sup>, Piotr Milkiewicz<sup>15</sup>, Christian Rust<sup>16</sup>, Ulrich H. Beuers<sup>17</sup>, Christoph Schramm<sup>18</sup>, Tobias Müller<sup>19</sup>, Brijesh Srivastava<sup>20</sup>, Georgios Dalekos<sup>21,22</sup>, Cyriel Y. Ponsioen<sup>23</sup>, Martina Sterneck<sup>24</sup>, Andreas Teufel<sup>25</sup>, Andrew L. Mason<sup>26</sup>, Domenico Alvaro<sup>27</sup>, Tim Lankisch<sup>28</sup>, Einar Björnsson<sup>29</sup>, Marco Marzioni<sup>30</sup>, Niklas Björkström<sup>31</sup>, Mette Vesterhus<sup>2,32</sup>, Marco Carbone<sup>33</sup>, Ana Lleo<sup>34</sup>, Fredrik Rorsman<sup>35</sup>, Maria Benito de Valle Villalba<sup>36</sup>, Hanns-Ulrich Marschall<sup>37</sup>, Annarosa Floreani<sup>38</sup>, Kristian Hveem<sup>39</sup>, Richard N. Sandford<sup>40</sup>, Ansgar W. Lohse<sup>41</sup>, Peter R. Durie<sup>42</sup>, Espen Melum<sup>2,3,4,5</sup>, Leonid Padyukov<sup>43</sup>, Kirsten Muri Boberg<sup>2,4,5</sup>, Olivier Chazouillères<sup>44</sup>, Christopher L. Bowlus<sup>45</sup>, Erik Schrumpf<sup>2,4,5</sup>, Severine Vermeire<sup>46,47</sup>, Graeme Alexander<sup>48</sup>, Annika Bergquist<sup>49</sup>, Michael P. Manns<sup>50,51</sup>, Martti Färkkilä<sup>52</sup>, Roger W. Chapman<sup>53</sup>, Carl A. Anderson<sup>1</sup>.

1. Department of Human Genetics, Wellcome Trust Sanger Institute, Wellcome Trust Genome Campus, Hinxton, CB10 1SA, England, UK.
2. Norwegian PSC Research Center, Oslo University Hospital, Oslo, Norway Department of Transplantation Medicine, Oslo University Hospital, Oslo, Norway.
3. Institute of Clinical Medicine, University of Oslo, Oslo, Norway.
4. Section of Gastroenterology, Department of Transplantation Medicine, Oslo University Hospital, Oslo, Norway.
5. Research Institute of Internal Medicine, Oslo University Hospital Rikshospitalet, Oslo, Norway.
6. Norfolk and Norwich University Hospital, Colney Lane, Norwich NR4 7UY, UK.
7. Department of Gastroenterology, Hepatology and Endocrinology, Hannover Medical School, Hannover, Germany.
8. Integrated Research and Treatment Center-Transplantation (IFB-tx), Hannover Medical School, Hannover, Germany.
9. Snyder Institute of Chronic Diseases, Department of Medicine, University of Calgary, Calgary, Canada.
10. International Center for Digestive Health, Department of Medicine and Surgery, University of Milan-Bicocca, Milan, Italy.

11. Division of Gastroenterology, Department of Medicine, University of Toronto, Toronto, Canada.
12. Centre for Liver Research, NIHR Biomedical Research Unit, Birmingham, UK.
13. Department of Medicine, University Hospital of Heidelberg, Heidelberg, Germany.
14. Liver Unit, Hospital Clínic, IDIBAPS, CIBERehd, University of Barcelona, Barcelona, Spain.
15. Liver Unit and Liver Research Laboratories, Pomeranian Medical University, Szczecin, Poland.
16. Department of Medicine 2, Grosshadern, University of Munich, Munich, Germany.
17. Department of Gastroenterology & Hepatology, Tytgat Institute for Liver and Intestinal Research, Academic Medical Center, University of Amsterdam, The Netherlands.
18. 1st Department of Medicine, University Medical Center Hamburg-Eppendorf, Hamburg, Germany.
19. Department of Internal Medicine, Hepatology and Gastroenterology, Charité Universitätsmedizin Berlin, Berlin, Germany.
20. Academic Department of Medical Genetics, University of Cambridge, Cambridge, UK.
21. Department of Medicine, Medical School, University of Thessaly, Larissa, Greece.
22. Research Laboratory of Internal Medicine, Medical School, University of Thessaly, Larissa, Greece.
23. Department of Gastroenterology and Hepatology, Academic Medical Center Amsterdam, the Netherlands.
24. Department of Hepatobiliary Surgery and Transplantation, University Medical Center Hamburg-Eppendorf, Hamburg, Germany.
25. 1st Department of Medicine, University of Mainz, Mainz, Germany.
26. Division of Gastroenterology and Hepatology, University of Alberta, Edmonton, Alberta, Canada.
27. Department of Clinical Medicine, Division of Gastroenterology, Sapienza University of Rome, Rome, Italy.
28. Department of Gastroenterology Hepatology and Endocrinology, Hannover Medical School, Hannover, Germany.
29. Department of Internal Medicine, Division of Gastroenterology and Hepatology, Landspítali University Hospital, Reykjavik, Iceland.
30. Riuniti University Hospital, Ancona, Italy.
31. Center for Infectious Medicine, Department of Medicine Huddinge, Karolinska Institutet, Stockholm, Sweden.
32. National Centre for Ultrasound in Gastroenterology, Haukeland University Hospital, Bergen, Norway.
33. Humanitas Clinical and Research Center, Rozzano, Milan, Italy.
34. Center for Autoimmune Liver Diseases, Department of Medicine, IRCCS Istituto Clinico Humanitas, Milan, Italy.
35. Dept of Gastroenterology and Hepatology, Uppsala University Hospital, Uppsala, Sweden.
36. Sahlgrenska University Hospital, Per Dubbsgatan 15, 41345 Gothenburg, Sweden.
37. Department of Internal Medicine, Institute of Medicine, Sahlgrenska Academy and University Hospital, Gothenburg, Sweden.
38. Dept. of Surgical, Oncological and Gastroenterological Sciences, University of Padova, Padova, Italy.
39. Department of Public Health, Faculty of Medicine, Norwegian University of Science and Technology, Trondheim, Norway.
40. Academic Department of Medical Genetics, University of Cambridge, Cambridge, UK.
41. 1st Department of Medicine, University Medical Center Hamburg-Eppendorf, Hamburg, Germany.
42. Physiology and Experimental Medicine, Research Institute, Hospital for Sick Children, Toronto, Ontario, Canada.
43. Rheumatology Unit, Department of Medicine, Karolinska Institutet and Karolinska University Hospital Solna, Stockholm, Sweden.
44. AP-HP, Hôpital Saint Antoine, Department of Hepatology, UPMC Univ Paris 06, Paris, France.
45. Division of Gastroenterology and Hepatology, University of California Davis, Davis, CA, USA.
46. Department of Clinical and Experimental Medicine, KU Leuven, Leuven, Belgium.
47. Department of Gastroenterology, University Hospitals Leuven, Leuven, Belgium.
48. Department of Medicine, Division of Hepatology, University of Cambridge, Cambridge, UK.
49. Gastrocentrum Medicin, Karolinska Univ, Stockholm, Sweden.
50. Department of Gastroenterology Hepatology and Endocrinology, Hannover Medical School, Hannover, Germany.
51. Integrated Research and Treatment Center-Transplantation (IFB-tx), Hannover Medical School, Hannover, Germany.



52. Division of Gastroenterology, Department of Medicine, Helsinki University Hospital, Finland.  
53. Department of Hepatology, John Radcliffe University Hospitals NHS Trust, Oxford, UK.

## **Genetic Analysis of Psoriasis Consortium (GAPC)**

### Management Committee

Richard C Trembath (Chair)<sup>1,2</sup>, Jonathan N Barker<sup>1</sup>, A David Burden<sup>3</sup>, Michael J Cork<sup>4</sup>, Xavier Estivill<sup>5</sup>, Christopher EM Griffiths<sup>6</sup>, Juha Kere<sup>7</sup>, Ross McManus<sup>8,9</sup>, Giuseppe Novelli<sup>10,11</sup>, André Reis<sup>12</sup>, Lena Samuelsson<sup>13</sup>, Joost Schalkwijk<sup>14</sup>, Mona Stähle<sup>15</sup>, Rachid Tazi-Ahnini<sup>4</sup>, Wolfgang Weger<sup>16</sup>, Jane Worthington<sup>17</sup>

### KCL group

Michael H Allen<sup>1</sup>, Jonathan N Barker<sup>1</sup>, Francesca Capon<sup>1</sup>, Adrian Hayday<sup>18</sup>, Jo Knight<sup>1,2</sup>, Frank O Nestle<sup>1</sup>, Alexandros Onoufriadis<sup>1</sup>, Catherine H Smith<sup>19</sup>, Richard C Trembath<sup>1,2</sup>, Michael E Weale<sup>1</sup>

### AU-Graz group:

Angelika Hofer<sup>16</sup>, Wolfgang Salmhofer<sup>16</sup>, Wolfgang Weger<sup>16</sup>, Peter Wolf<sup>16</sup>

### FIN-Helsinki group:

Kati Kainu<sup>20</sup>, Juha Kere<sup>7</sup>, Ulpu Saarialho-Kere<sup>20</sup>, Sari Suomela<sup>20</sup>

### GER-Erlangen group:

Petra Badorf<sup>12</sup>, Ulrike Hüffmeier<sup>12</sup>, Werner Kurrat<sup>21</sup>, Wolfgang Küster<sup>22</sup>, Jesús Lascorz<sup>23</sup>, Rotraut Mössner<sup>24</sup>, André Reis<sup>12</sup>, Funda Schürmeier-Horst<sup>25</sup>, Markward Ständer<sup>26</sup>, Heiko Traupe<sup>25</sup>

### HOL-Nijmegen group:

Judith G M Bergboer<sup>14</sup>, Martin den Heijer<sup>27</sup>, Joost Schalkwijk<sup>14</sup>, Peter C. van de Kerkhof<sup>14</sup>, Patrick L J M Zeeuwen<sup>14</sup>

### IRE-Dublin group (GRIPPsA members are denoted by \*):

Louise Barnes<sup>8,9</sup>, Linda E Campbell<sup>28</sup>, Catriona Cusack<sup>29</sup>, Ciara Coleman<sup>8,9</sup>, Judith Conroy<sup>8,9</sup>, Sean Ennis<sup>8,9</sup>, Oliver Fitzgerald<sup>30\*</sup>, Phil Gallagher<sup>30</sup>, Alan D Irvine<sup>31\*</sup>, Brian Kirby<sup>30\*</sup>, Trevor Markham<sup>29</sup>, WH Irwin McLean<sup>28</sup>, Ross McManus<sup>8,9\*</sup>, Joe McPartlin<sup>8,9</sup>, Sarah F Rogers<sup>30</sup>, Anthony W Ryan<sup>8,9</sup>, Agnieszka Zawirska<sup>30</sup>

### ITA-Rome group:

Emiliano Giardina<sup>10</sup>, Tiziana Lepre<sup>10</sup>, Giuseppe Novelli<sup>10,11</sup>, Carlo Perricone<sup>10</sup>

### SPA-Barcelona group:

Xavier Estivill<sup>5</sup>, Gemma Martín-Ezquerro<sup>32</sup>, Ramon M Pujol<sup>32</sup>, Eva Riveira-Munoz<sup>5</sup>

### SWE-Gothenburg group:

Annica Inerot<sup>33</sup>, Åsa T Naluai<sup>13</sup>, Lena Samuelsson<sup>13</sup>,

### SWE-Stockholm group:

Lotus Mallbris<sup>15</sup>, Mona Stähle<sup>15</sup>, Katarina Wolk<sup>15</sup>

### UK-Glasgow group:

A David Burden<sup>3</sup>, Joyce Leman<sup>3</sup>

### UK-Manchester group:

Anne Barton<sup>17</sup>, Christopher EM Griffiths<sup>6</sup>, Richard B Warren<sup>6</sup>, Jane Worthington<sup>17</sup>, Helen S Young<sup>6</sup>

### UK-Sheffield group:

Michael J Cork<sup>4</sup>, Rachid Tazi-Ahnini<sup>4</sup>

### Groningen group (Italian and Dutch controls):

Isis Ricano-Ponce<sup>34</sup>, Gosia Trynka<sup>34</sup>, Cisca Wijmenga<sup>34</sup>

<sup>1</sup>Division of Genetics and Molecular Medicine, King's College London, London, UK; <sup>2</sup>National Institute for Health Research (NIHR), Biomedical Research Centre, Guy's and St. Thomas' NHS Foundation Trust and King's College London, London, UK; <sup>3</sup>Department of Dermatology, Western Infirmary, Glasgow, UK; <sup>4</sup>Academic Unit of Dermatology Research, Department of Infection and Immunity, The University of Sheffield, Sheffield, UK; <sup>5</sup>Genes and Disease Programme, Centre for Genomic Regulation (CRG) and UPF, Hospital del Mar Research Institute (CRG), and Public Health and Epidemiology Network Biomedical Research Centre (CIBERESP), Barcelona, Spain; <sup>6</sup>Dermatological Sciences, Salford Royal NHS Foundation Trust, University of

Manchester, Manchester Academic Health Science Centre, Manchester, UK; 7Department of Biosciences and Nutrition, Karolinska Institutet, Stockholm, Sweden, and Folkhälsan Institute of Genetics, Helsinki, Finland, and Department of Medical Genetics, University of Helsinki, Finland; 8Department of Clinical Medicine, Trinity College Dublin, Ireland; 9Institute of Molecular Medicine, Trinity College Dublin, Ireland 10National Agency for Evaluation of Universities and Research Institutes (ANVUR); 11Research Center San Pietro Hospital, Rome, Italy; 12Institute of Human Genetics, University of Erlangen-Nuremberg, Erlangen, Germany; 13Department of Medical and Clinical Genetics, Institute of Biomedicine, Sahlgrenska Academy, University of Gothenburg, Gothenburg, Sweden; 14Department of Dermatology, Radboud University Nijmegen Medical Centre, Nijmegen, The Netherlands; 15Dermatology Unit, Department of Medicine, Karolinska Institutet, Stockholm, Sweden; 16Department of Dermatology, Medical University of Graz, Graz, Austria; 17Arthritis Research UK Epidemiology Unit, University of Manchester, Manchester Academic Health Science Centre, Manchester, UK; 18Division of Immunology, Infection and Inflammatory Disease; King's College London, London, UK; 19St John's Institute of Dermatology, King's College London, London, UK; 20Department of Dermatology and Venerology, University of Helsinki, Helsinki, Finland; 21Asklepios Nordseeklinik, Westerland/Sylt, Germany; 22TOMESA Clinics, Bad Salschlirf, Germany; 23Division of Molecular Genetic Epidemiology, German Cancer Research Center (DKFZ), Heidelberg, Germany; 24Department of Dermatology, University of Göttingen, Göttingen, Germany; 25Department of Dermatology, University of Münster, Münster, Germany; 26Psoriasis Rehabilitation Hospital, Bad Bentheim, Germany; 27Department of Endocrinology and Department of Epidemiology and Biostatistics, Radboud University Nijmegen Medical Centre, Nijmegen, The Netherlands; 28University of Dundee, Dundee, UK; 29University College Hospital Galway, Galway, Ireland; 30St Vincent's University Hospital, Dublin, Ireland; 31Department of Clinical Medicine, Trinity College Dublin, Our Lady's Children's Hospital Crumlin, Dublin, Ireland; 32Dermatology Service, Hospital del Mar-IMAS, Barcelona, Spain; 33Department of Dermatology and Venereology, Sahlgrenska University Hospital, Gothenburg, Sweden; 34Genetics Department, University Medical Center Groningen and the University of Groningen, the Netherlands.

## **Psoriasis Association Genetics Extension (PAGE)**

### University of Michigan (UMich)

James T Elder<sup>1,2</sup>, Philip E Stuart<sup>1</sup>, Rajan P Nair<sup>1</sup>, Trilokraj Tejasvi<sup>1</sup>, Johann E. Gudjonsson<sup>1</sup>, John J Voorhees<sup>1</sup>

Lam C Tsoi<sup>3</sup>, Jun Ding<sup>3</sup>, Yanming Li<sup>3</sup>, Hyun M Kang<sup>3</sup>, Goncalo R Abecasis<sup>3</sup>

### Christian-Albrechts-University (CAU) of Kiel

Andre Franke<sup>4</sup>, Eva Ellinghaus<sup>4</sup>, Stefan Schreiber<sup>4</sup>, Ulrich Mrowietz<sup>5</sup>, Stephan Weidinger<sup>5</sup>, Michael Weichenthal<sup>5</sup>

### University of Toronto (UToronto)

Dafna D Gladman<sup>6</sup>, Fawnda J Pellett<sup>6</sup>, Vinod Chandran<sup>6</sup>, Cheryl F Rosen<sup>7</sup>

### Memorial University (MU)

Proton Rahman<sup>8</sup>

### University of Tartu (UTartu) and Estonian Genome Center Univeristy of Tartu (EGCUT)

Sulev Koks<sup>9</sup>, Külli Kingo<sup>10</sup> Tonu Esko<sup>11</sup>, Andres Metspalu<sup>11</sup>

### The Feinstein Institute for Medical Research (FIMR)

Peter Gregersen<sup>12</sup>

### National Psoriasis Victor Henschel BioBank (NPF)

Andrew Henschel<sup>13</sup>, Marin Aurand<sup>13</sup>, Bruce Bebo<sup>13</sup>

### Henry Ford Hospital (HFH)

Henry W Lim<sup>14</sup>

### Collaborative Research in the Region of Augsburg (KORA)

H. Erich Wichmann<sup>15,16,17</sup>, Christian Gieger<sup>18</sup>, Thomas Illig<sup>19</sup>, Juliane Winkelmann<sup>20,21,22</sup>

<sup>1</sup>Department of Dermatology, University of Michigan Ann Arbor, MI 48109, USA; <sup>2</sup>Ann Arbor Veterans Affairs Hospital, Ann Arbor, MI 48105 USA; <sup>3</sup>Department of Biostatistics, Center for Statistical Genetics,

University of Michigan Ann Arbor, MI 48109, USA; 4Institute of Clinical Molecular Biology, Christian-Albrechts-University of Kiel, 24105 Kiel, Germany; 5Department of Dermatology, University Hospital, Schleswig-Holstein, Christian-Albrechts-University of Kiel, 24105 Kiel, Germany; 6Department of Medicine, Division of Rheumatology, University of Toronto, Toronto Western Hospital, Toronto, Ontario M5T 2S8, Canada; 7Department of Medicine, Division of Dermatology, University of Toronto, Toronto Western Hospital, Toronto, Ontario M5T2S8; 8Department of Medicine, Memorial University, St. John's, Newfoundland A1C 5B8, Canada; 9Department of Physiology, Centre of Translational Medicine and Centre for Translational Genomics, University of Tartu, 50409 Tartu, Estonia; 10Department of Dermatology and Venerology, University of Tartu, 50409 Tartu, Estonia; 11Estonian Genome Center and Center of Translational Genomics; Estonian Biocenter; Institute of Molecular and Cell Biology, University of Tartu, 50409 Tartu, Estonia; 12Robert S. Boas Center for Genomics and Human Genetics, The Feinstein Institute for Medical Research, Manhasset, NY 11030; 13National Psoriasis Foundation, Portland, OR 97223 USA; 14Henry Ford Hospital, Detroit, Michigan, 48202, USA. 15Institute of Epidemiology I, Helmholtz Centre Munich, German Research Center for Environmental Health, 85764 Neuherberg, Germany; 16Institute of Medical Informatics, Biometry and Epidemiology, Ludwig-Maximilians-University, 81377 Munich, Germany; 17Klinikum Grosshadern, 81377 Munich, Germany; 18Institute of Genetic Epidemiology, Helmholtz Centre Munich, German Research Center for Environmental Health, 85764 Neuherberg, Germany, 19Research Unit Molecular Epidemiology, Helmholtz Centre Munich, German Research Center for Environmental Health, 85764 Neuherberg, Germany; 20Department of Neurology, Technische Universität München, Munich, Germany; 21Institute of Human Genetics, Technische Universität München, Munich, Germany; 22Institute of Human Genetics, Helmholtz Zentrum Munich, German Research Center for Environmental Health, Munich, Germany.

## References

1. International Genetics of Ankylosing Spondylitis Consortium *et al.* Identification of multiple risk variants for ankylosing spondylitis through high-density genotyping of immune-related loci. *Nat Genet* **45**, 730-8 (2013).
2. Jostins, L. *et al.* Host-microbe interactions have shaped the genetic architecture of inflammatory bowel disease. *Nature* **491**, 119-24 (2012).
3. Tsoi, L.C. *et al.* Identification of 15 new psoriasis susceptibility loci highlights the role of innate immunity. *Nat Genet* **44**, 1341-8 (2012).
4. Liu, J.Z. *et al.* Dense genotyping of immune-related disease regions identifies nine new risk loci for primary sclerosing cholangitis. *Nat Genet* **45**, 670-5 (2013).
5. Gusev, A. *et al.* Partitioning heritability of regulatory and cell-type-specific variants across 11 common diseases. *Am J Hum Genet* **95**, 535-52 (2014).
6. Fehrmann, R.S. *et al.* Trans-eQTLs reveal that independent genetic variants associated with a complex phenotype converge on intermediate genes, with a major role for the HLA. *PLoS Genet* **7**, e1002197 (2011).
7. Nelis, M. *et al.* Genetic structure of Europeans: a view from the North-East. *PLoS One* **4**, e5472 (2009).
8. Fantom Consortium *et al.* A promoter-level mammalian expression atlas. *Nature* **507**, 462-70 (2014).
9. Roadmap Epigenomics Consortium *et al.* Integrative analysis of 111 reference human epigenomes. *Nature* **518**, 317-30 (2015).
10. Jensen, A.B. *et al.* Temporal disease trajectories condensed from population-wide registry data covering 6.2 million patients. *Nat Commun* **5**, 4022 (2014).
11. Han, B., Pouget, J.G.; Slowikowski, K.; Stahl, E.; Lee, C.H.; Diogo, D.; Hu, X.; Park, Y.R.; Kim, E.; Gregersen, P.K.; Dahqvist, S.R.; Worthington, J.; Eyre, S.; Klareskog, L.; Huizinga, T.; Chen, W.-M.; Onengut-Gumuscu, S.; Rich, S.S.; Major Depressive Disorder Working Group of the PGC; Wray, N.; Raychaudhuri, S. Using genotype data to distinguish pleiotropy from heterogeneity: deciphering coheritability in autoimmune and neuropsychiatric diseases. *bioRxiv* (2015).
12. Cross-Disorder Group of the Psychiatric Genomics, C. *et al.* Genetic relationship between five psychiatric disorders estimated from genome-wide SNPs. *Nat Genet* **45**, 984-94 (2013).
13. Patterson, N., Price, A.L. & Reich, D. Population structure and eigenanalysis. *PLoS Genet* **2**, e190 (2006).
14. Liley, J. & Wallace, C. A pleiotropy-informed Bayesian false discovery rate adapted to a shared control design finds new disease associations from GWAS summary statistics. *PLoS Genet* **11**, e1004926 (2015).
15. Pruim, R.J. *et al.* LocusZoom: regional visualization of genome-wide association scan results. *Bioinformatics* **26**, 2336-7 (2010).
16. Pendergrass, S.A., Dudek, S.M., Crawford, D.C. & Ritchie, M.D. Synthesis-View: visualization and interpretation of SNP association results for multi-cohort, multi-phenotype data and meta-analysis. *BioData Min* **3**, 10 (2010).
17. Pers, T.H. *et al.* Biological interpretation of genome-wide association studies using predicted gene functions. *Nat Commun* **6**, 5890 (2015).
18. Kamburov, A. *et al.* ConsensusPathDB: toward a more complete picture of cell biology. *Nucleic Acids Res* **39**, D712-7 (2011).
19. Parkes, M., Cortes, A., van Heel, D.A. & Brown, M.A. Genetic insights into common pathways and complex relationships among immune-mediated diseases. *Nat Rev Genet* **14**, 661-73 (2013).
20. Wood, A.R. *et al.* Defining the role of common variation in the genomic and biological architecture of adult human height. *Nat Genet* **46**, 1173-86 (2014).
21. Genomes Project, C. *et al.* An integrated map of genetic variation from 1,092 human genomes. *Nature* **491**, 56-65 (2012).
22. Fehrmann, R.S. *et al.* Gene expression analysis identifies global gene dosage sensitivity in cancer. *Nat Genet* **47**, 115-25 (2015).
23. Croft, D. *et al.* Reactome: a database of reactions, pathways and biological processes. *Nucleic Acids Res* **39**, D691-7 (2011).
24. Raychaudhuri, S. *et al.* Identifying relationships among genomic disease regions: predicting genes at pathogenic SNP associations and rare deletions. *PLoS Genet* **5**, e1000534 (2009).
25. Kanehisa, M., Goto, S., Sato, Y., Furumichi, M. & Tanabe, M. KEGG for integration and interpretation of large-scale molecular data sets. *Nucleic Acids Res* **40**, D109-14 (2012).
26. Bult, C.J. *et al.* Mouse genome informatics in a new age of biological inquiry. in *Proceedings of the IEEE International Symposium on Bio-Informatics and Biomedical Engineering* 29-32 (2000).
27. Lage, K. *et al.* A human phenome-interactome network of protein complexes implicated in genetic disorders. *Nat Biotechnol* **25**, 309-16 (2007).
28. Trynka, G. *et al.* Disentangling the Effects of Colocalizing Genomic Annotations to Functionally Prioritize Non-coding Variants within Complex-Trait Loci. *Am J Hum Genet* **97**, 139-52 (2015).
29. Andersson, R. *et al.* An atlas of active enhancers across human cell types and tissues. *Nature* **507**, 455-61 (2014).
30. So, H.C., Gui, A.H., Cherny, S.S. & Sham, P.C. Evaluating the heritability explained by known susceptibility variants: a survey of ten complex diseases. *Genet Epidemiol* **35**, 310-7 (2011).
31. Lee, S.H., Yang, J., Goddard, M.E., Visscher, P.M. & Wray, N.R. Estimation of pleiotropy between complex diseases using single-nucleotide polymorphism-derived genomic relationships and restricted maximum likelihood. *Bioinformatics* **28**, 2540-2 (2012).

32. Yang, J., Lee, S.H., Goddard, M.E. & Visscher, P.M. GCTA: a tool for genome-wide complex trait analysis. *Am J Hum Genet* **88**, 76-82 (2011).
33. Lee, S.H. *et al.* Estimating the proportion of variation in susceptibility to schizophrenia captured by common SNPs. *Nat Genet* (2012).
34. Law, V. *et al.* DrugBank 4.0: shedding new light on drug metabolism. *Nucleic Acids Res* **42**, D1091-7 (2014).
35. Andreassen, O.A., Thompson, W.K. & Dale, A.M. Boosting the power of schizophrenia genetics by leveraging new statistical tools. *Schizophr Bull* **40**, 13-7 (2014).
36. Andreassen, O.A. *et al.* Improved detection of common variants associated with schizophrenia and bipolar disorder using pleiotropy-informed conditional false discovery rate. *PLoS Genet* **9**, e1003455 (2013).
37. Purcell, S. *et al.* PLINK: a tool set for whole-genome association and population-based linkage analyses. *Am J Hum Genet* **81**, 559-75 (2007).
